# Supplementary material
Source: PubMed Central journal article supplement (PMC9320120)
Supplement: NIHMS1823052-supplement-Supporting_info.pdf [file NIHMS1823052-supplement-Supporting_info.pdf]

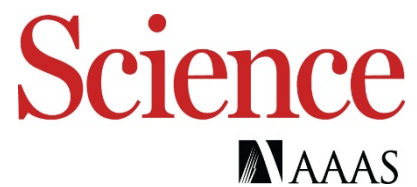

## Supplementary Materials for

### **Arylsulfonylacetamides as bifunctional reagents for alkene aminoarylation**

Timothy M. Monos<sup>†</sup>, Rory C. McAtee<sup>†</sup>, Corey R. J. Stephenson\*

<sup>†</sup>These authors contributed equally.

\*Correspondence to: [crjsteph@umich.edu](mailto:crjsteph@umich.edu)

#### **This PDF file includes:**

Materials and Methods  
Figures S1 to S11  
Tables S1 to S5  
References (44-54)

## Table of Contents

|                                                                                                                                     |           |
|-------------------------------------------------------------------------------------------------------------------------------------|-----------|
| <b>General Information</b> .....                                                                                                    | <b>5</b>  |
| <b>Figure S1: General Reaction Set-up</b> .....                                                                                     | <b>6</b>  |
| <b>Figure S2: General Procedure A: Radical Aminoarylation of Alkenes (0.3 mmol scale):</b>                                          | <b>7</b>  |
| <b>Step-by-step Reaction Set-up Pictures</b> .....                                                                                  | <b>8</b>  |
| <b>Reaction Optimization Experiments</b> .....                                                                                      | <b>9</b>  |
| Table S1: Reaction Optimization Results.....                                                                                        | 9         |
| Table S2: Photocatalyst Redox Potentials.....                                                                                       | 10        |
| Table S3: Unreactive Substrates for Aminoarylation Reaction.....                                                                    | 11        |
| Figure S3: Strong base interaction with Ir(dF(CF <sub>3</sub> )ppy) <sub>2</sub> (5,5'-d(CF <sub>3</sub> )bpy)PF <sub>6</sub> ..... | 12        |
| <b>Kinetic Profiling and Mechanism Elucidation Experiments</b> .....                                                                | <b>16</b> |
| <b>Figure S4: Stern-Volmer Quenching Experiment</b> .....                                                                           | <b>16</b> |
| Constant [Ir]-1, variable <i>E</i> -anethole .....                                                                                  | 16        |
| Constant [Ir]-1, variable <i>Z</i> -anethole .....                                                                                  | 17        |
| Constant [Ir]-1, variable sulfonylacetamide 2.....                                                                                  | 18        |
| <b>Figure S5: Reaction Profile and Initial Rates for Aminoarylation with vinyl-Anisole</b> .....                                    | <b>20</b> |
| Aminoarylation Reaction Profile with vinyl-anisole.....                                                                             | 21        |
| Plotted Aminoarylation Reaction Profile with vinyl-anisole .....                                                                    | 21        |
| Plotted Aminoarylation Reaction Profile with vinyl-anisole .....                                                                    | 22        |
| Plotted Initial Rates for Aminoarylation with vinyl-anisole .....                                                                   | 23        |
| <b>Figure S6: Reaction Profile and Initial Rates for Aminoarylation with <i>trans</i>-Anethole</b> ...                              | <b>24</b> |
| Aminoarylation Reaction Profile with <i>trans</i> -Anethole .....                                                                   | 25        |
| Plotted Aminoarylation Reaction Profile with <i>trans</i> -Anethole .....                                                           | 25        |
| Plotted Aminoarylation Reaction Profile with <i>trans</i> -Anethole .....                                                           | 26        |
| Plotted Initial Rates for Aminoarylation with <i>trans</i> -Anethole.....                                                           | 26        |
| <b>Figure S7: Reaction Profile and Initial Rates for Aminoarylation with <i>cis</i>-Anethole</b> .....                              | <b>28</b> |
| Aminoarylation Reaction Profile with <i>cis</i> -Anethole.....                                                                      | 29        |
| Plotted Aminoarylation Reaction Profile with <i>cis</i> -Anethole.....                                                              | 29        |
| Plotted Aminoarylation Reaction Profile with <i>cis</i> -Anethole.....                                                              | 30        |
| Plotted Initial Rates for Aminoarylation with <i>cis</i> -Anethole .....                                                            | 30        |
| <b>Figure S8: Reaction Profile and Initial Rates for Alkene Isomerization with <i>trans</i>-Anethole</b> .....                      | <b>32</b> |
| Plotted Isomerization Reaction Profile with <i>cis</i> -Anethole .....                                                              | 33        |
| Plotted Initial Rates for Isomerization with <i>cis</i> -Anethole.....                                                              | 33        |
| <b>Figure S9: Reaction Profile for Alkene Isomerization with <i>cis</i>-Anethole</b> .....                                          | <b>35</b> |
| Plotted Isomerization Reaction Profile with <i>trans</i> -Anethole.....                                                             | 36        |

|                                                                                                                      |           |
|----------------------------------------------------------------------------------------------------------------------|-----------|
| Plotted Isomerization Reaction Profile for 10 min with <i>trans</i> -Anethole .....                                  | 37        |
| <b>Figure S10: Determination of Photostationary State Between <i>cis</i>-Anethole and <i>trans</i>-Anethole.....</b> | <b>38</b> |
| <b>Figure S11: Aminoarylation Product Stability Assay .....</b>                                                      | <b>39</b> |
| <b>Preparation of Reagents: .....</b>                                                                                | <b>41</b> |
| Preparation of Ir(dF(CF <sub>3</sub> )ppy) <sub>2</sub> (5,5'-d(CF <sub>3</sub> )bpy)PF <sub>6</sub> (3)/[Ir]-1..... | 41        |
| <b>Acyl Sulfonamides:.....</b>                                                                                       | <b>44</b> |
| <i>N</i> -(naphthalen-1-ylsulfonyl)acetamide (2) .....                                                               | 44        |
| ethyl (naphthalen-1-ylsulfonyl)carbamate (S1) .....                                                                  | 47        |
| tert-butyl (naphthalen-1-ylsulfonyl)carbamate (S2) .....                                                             | 49        |
| 2,2,2-trifluoro- <i>N</i> -(naphthalen-1-ylsulfonyl)acetamide (S3).....                                              | 51        |
| <i>N</i> -(thiophen-2-ylsulfonyl)acetamide (S4) .....                                                                | 54        |
| methyl 3-( <i>N</i> -acetylsulfamoyl)thiophene-2-carboxylate (S5).....                                               | 56        |
| <i>N</i> -(quinolin-8-ylsulfonyl)acetamide (S6).....                                                                 | 58        |
| <i>N</i> -(naphthalen-2-ylsulfonyl)acetamide (S7).....                                                               | 60        |
| methyl 5-( <i>N</i> -acetylsulfamoyl)furan-2-carboxylate (S8) .....                                                  | 62        |
| <i>N</i> -(thiophen-3-ylsulfonyl)acetamide (S9) .....                                                                | 64        |
| <i>N</i> -((5-chlorothiophen-2-yl)sulfonyl)acetamide (S10) .....                                                     | 66        |
| <i>N</i> -((5-bromothiophen-2-yl)sulfonyl)acetamide (S11) .....                                                      | 68        |
| <i>N</i> -(benzo[d]thiazol-2-ylsulfonyl)acetamide (S12) .....                                                        | 70        |
| ( <i>E</i> )- <i>N</i> -(styrylsulfonyl)acetamide (S13).....                                                         | 72        |
| <i>N</i> -(naphthalen-1-ylsulfonyl)hexanamide (S14).....                                                             | 74        |
| <b><i>p</i>-methoxybenzene alkenes:.....</b>                                                                         | <b>76</b> |
| 1-methoxy-4-vinylbenzene (1) .....                                                                                   | 76        |
| ( <i>E</i> )-1-methoxy-4-(prop-1-en-1-yl)benzene (S15) .....                                                         | 76        |
| ( <i>Z</i> )-1-methoxy-4-(prop-1-en-1-yl)benzene (28) .....                                                          | 76        |
| 1-(cyclopent-1-en-1-yl)-4-methoxybenzene (S16).....                                                                  | 77        |
| 1-(4-methoxyphenyl)cyclohept-1-ene (S17).....                                                                        | 80        |
| <i>N</i> -[( <i>E</i> )-3-(4-methoxyphenyl)allyl]-4-methyl- <i>N</i> -phenacyl-benzenesulfonamide (S18).....         | 82        |
| ( <i>E</i> )-3-(4-methoxyphenyl)allyl acetate (S19) .....                                                            | 85        |
| 7-methoxy-1,2-dihydronaphthalene (S20) .....                                                                         | 87        |
| <b>Aminoarylation Products: .....</b>                                                                                | <b>88</b> |
| <i>N</i> -(2-(4-methoxyphenyl)-2-(naphthalen-1-yl)ethyl)acetamide (4) .....                                          | 88        |
| ethyl-(2-(4-methoxyphenyl)-2-(naphthalen-1-yl)ethyl)carbamate (5) .....                                              | 90        |
| tert-butyl-(2-(4-methoxyphenyl)-2-(naphthalen-1-yl)ethyl)carbamate (6).....                                          | 92        |
| tert-butyl-1-(4-methoxyphenyl)-1-(naphthalen-1-yl)propan-2-yl)carbamate (8).....                                     | 94        |
| <i>N</i> -1-(4-methoxyphenyl)-1-(naphthalen-1-yl)propan-2-yl)acetamide (9) .....                                     | 96        |

|                                                                                                                                                    |            |
|----------------------------------------------------------------------------------------------------------------------------------------------------|------------|
| <i>N</i> -1-(4-methoxyphenyl)-1-(naphthalen-2-yl)propan-2-yl)- <i>n</i> -pentamide (10).....                                                       | 98         |
| <i>N</i> -1-(4-methoxyphenyl)-1-(naphthalen-2-yl)propan-2-yl)acetamide (11) .....                                                                  | 100        |
| <i>N</i> -1-(4-methoxyphenyl)-1-(thiophen-3-yl)propan-2-yl)acetamide (12) .....                                                                    | 102        |
| methyl-2-acetamido-1-(4-methoxyphenyl)propyl)thiophene-2-carboxylate (13) .....                                                                    | 104        |
| <i>N</i> -1-(4-methoxyphenyl)-1-(thiophen-2-yl)propan-2-yl)acetamide (14) .....                                                                    | 106        |
| <i>N</i> -1-(5-bromothiophen-2-yl)-1-(4-methoxyphenyl)propan-2-yl)acetamide (15) .....                                                             | 108        |
| Methyl-2-acetamido-1-(4-methoxyphenyl)propyl)furan-2-carboxylate (16) .....                                                                        | 110        |
| <i>N</i> -1-(4-methoxyphenyl)-1-(quinolin-8-yl)propan-2-yl)acetamide (17).....                                                                     | 112        |
| <i>N</i> -1-(5-chlorothiophen-2-yl)-1-(4-methoxyphenyl)propan-2-yl)acetamide (18) .....                                                            | 114        |
| <i>N</i> -1-(benzothiazol-2-yl)-1-(4-methoxyphenyl)propan-2-yl)acetamide (19) .....                                                                | 116        |
| <i>N</i> -(3-(4-methoxyphenyl)-5-phenylpent-4-en-2-yl)acetamide (20) .....                                                                         | 118        |
| <i>N</i> -(1-(4-methoxyphenyl)-3-((4-methyl- <i>N</i> -(2-oxo-2-phenylethyl)phenyl)sulfonamido)-1-(naphthalen-1-yl)propan-2-yl)acetamide (21)..... | 120        |
| 2-acetamido-3-(4-methoxyphenyl)-3-(naphthalen-1-yl)propyl acetate (22) .....                                                                       | 122        |
| <i>N</i> -(2-(4-methoxyphenyl)-2-(naphthalen-1-yl)cyclopentyl)acetamide (23) .....                                                                 | 124        |
| <i>N</i> -(2-(4-methoxyphenyl)-2-(thiophen-2-yl)cyclopentyl)acetamide (24) .....                                                                   | 126        |
| Methyl-2-acetamido-1-(4-methoxyphenyl)cyclopentyl)thiophene-2-carboxylate (25).....                                                                | 128        |
| <i>N</i> -(4-methoxyphenyl)-2-(naphthalen-1-yl)cycloheptyl)acetamide (26).....                                                                     | 130        |
| <i>N</i> -6-methoxy-1,2,3,4-tetrahydro-[1,1'-binaphthalen]-2-yl)acetamide (27) .....                                                               | 132        |
| <b>Crystallographic data for:</b> .....                                                                                                            | <b>134</b> |
| <i>N</i> -1-(5-bromothiophen-2-yl)-1-(4-methoxyphenyl)propan-2-yl)acetamide (15) .....                                                             | 134        |
| <i>N</i> -(2-(4-methoxyphenyl)-2-(naphthalen-1 yl)cyclopentyl)acetamide (23).....                                                                  | 136        |
| <b>References</b> .....                                                                                                                            | <b>138</b> |

## General Information

All chemicals were used as received and stored as recommended by the supplier. Reactions were monitored by thin layer chromatography (TLC) using glass-backed plates pre-coated with 230–400 mesh silica gel (250 mm thickness) with fluorescent indicator F254, available from EMD Millipore (cat. #: 1.05715.0001). Plates were visualized with a dual short wave/long wave UV lamp. Column flash chromatography was performed using 230-400 mesh silica (SiliCycle cat. #: R12030B) gel or via automated column chromatography. NMR spectra were recorded on Varian MR400, Varian Inova 500, Varian Vnmrs 500, or Varian Vnmrs 700 spectrometers. Chemical shifts for  $^1\text{H}$  NMR were reported as  $\delta$ , parts per million, relative to the signal of  $\text{CHCl}_3$  at 7.26 ppm and for DMSO 2.50. Chemical shifts for  $^{13}\text{C}$  NMR were reported as  $\delta$ , parts per million, relative to the center line signal of the  $\text{CDCl}_3$  triplet at 77.0 ppm and for DMSO 39.52 for center of septet.  $^{19}\text{F}$  NMR chemical shifts were reported as  $\delta$ , parts per million, relative to  $\text{CFCl}_3$  at 0.0 ppm. The abbreviations s, br. s, d, dd, br. d, ddd, t, q, br. q, qi, m, and br. m stand for the resonance multiplicity singlet, broad singlet, doublet, doublet of doublets, broad doublet, doublet of doublet of doublets, triplet, quartet, broad quartet, quintet, multiplet and broad multiplet, respectively. IR spectra were recorded on a Perkin-Elmer Spectrum BX FT-IR spectrometer fitted with an ATR accessory. Melting points were obtained using a Mel-Temp 3.0 (model no. 1401). Mass Spectra were recorded at the Mass Spectrometry Facility at the Department of Chemistry of the University of Michigan in Ann Arbor, MI on an Agilent Q-TOF HPCL-MS with ESI high resolution mass spectrometer using electrospray ionization (ESI), positive ion mode, or electron impact ionization (EI). Fluorescence quenching was recorded using a Horiba Scientific Fluoromax 2 using DataMax software. We thank Dr. James Windak and Dr. Paul Lennon at the University of Michigan Department of Chemistry instrumentation facility for conducting these experiments. X-Ray Crystallography work was done by Dr. Jeff. W. Kampf. UV-Vis measurements were obtained on a Shimadzu UV-1601 UV-Vis Spectrometer. Electrochemical data was collected on a CHI600E potentiostat with the accompanying CH Instruments software. H150 Blue grow lights from Kessil were used as the visible light irradiation source.

### Figure S1: General Reaction Set-up

Unless stated otherwise, all reactions were run on a 0.3 mmol scale in a 2-dram vial equipped with an oval shaped stir bar. 1 x H150 Blue Kessil lamp sufficiently irradiated 1-3 reaction vials at one time, about 5 cm away (Fig. S1A, side view). At this distance, with a fan dissipating the standing atmosphere (Fig. S1B, top view), the air temperature surrounding the reactions did not exceed 25 °C.

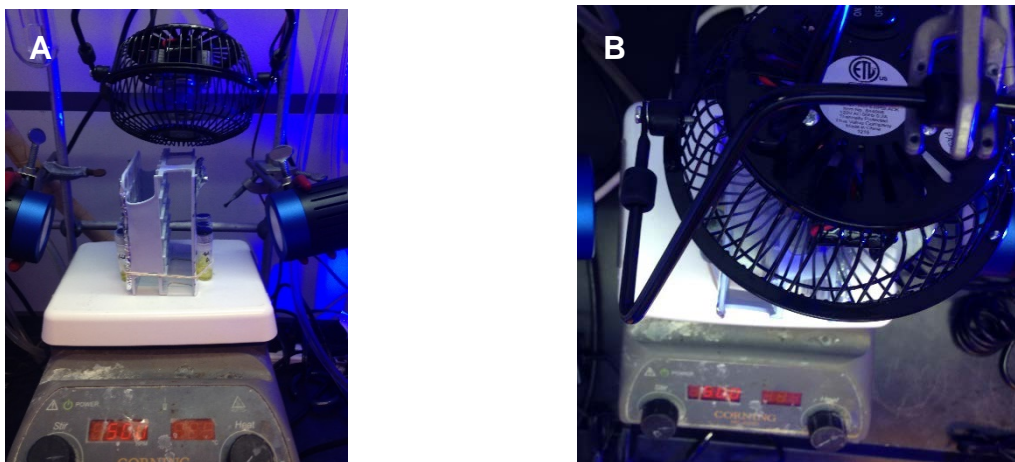

*General reaction set-up for radical aminoarylation*

**Figure S2: General Procedure A: Radical Aminoarylation of Alkenes (0.3 mmol scale):**

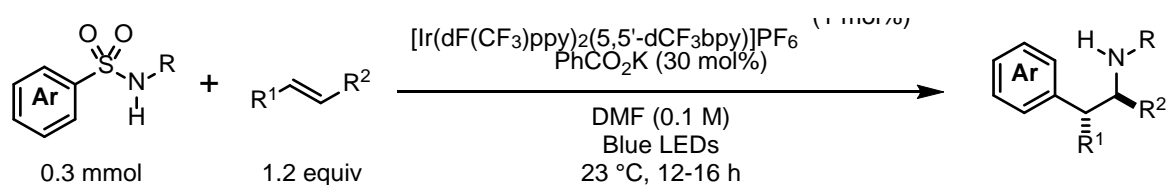

Unless otherwise noted, to a flame dried 2-dram vial, equipped with a teflon coated oval shaped stir bar, was added (aryl-sulfonyl)acetamide (1 equiv, 0.3 mmol), potassium benzoate (14.4 mg, 30 mol%), and  $\text{Ir}(\text{dF}(\text{CF}_3)\text{ppy})_2(5,5'\text{-d}(\text{CF}_3)\text{bpy})\text{PF}_6$  (3 mg, 1 mol%). The vial contents were then dissolved in anhydrous DMF (3 mL, 0.1 M). Finally, the alkene (1.2 equiv) was added to the reaction vial. The reaction was sparged under argon for 15 min, quickly capped and sealed with parafilm. Reactions were irradiated with 1 x blue H150 Kessil LED light and stirred (500 to 550 rpm) for 12 to 16 h at room temperature.

Reaction workup was performed by diluting the reaction with 15 mL  $\text{dH}_2\text{O}$  and extracting the aqueous layer with EtOAc (3 x 10 mL). The organic layers were combined, washed with 5 wt% LiCl (3 x 10 mL), brine (15 mL), dried over sodium sulfate, filtered and concentrated to provide the crude residue, which was purified by flash column chromatography.

## Step-by-step Reaction Set-up Pictures

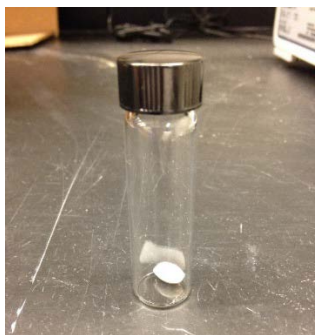

**Step 1:** Flame dried 2-dram vial and stir bar

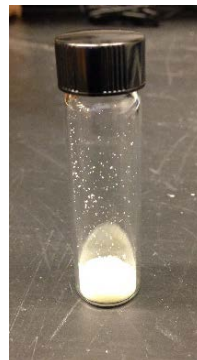

**Step 2:** Solid reagents loaded

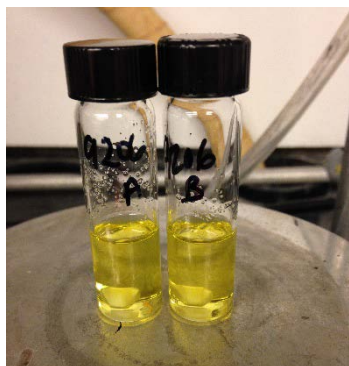

**Step 3:** Solid reagents diluted in DMF (0.1 M)

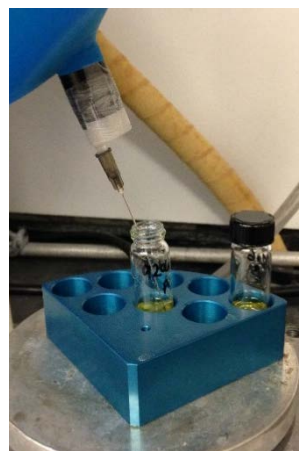

**Step 4:** Sparge degassing technique with argon balloon and 4" hypodermic needle

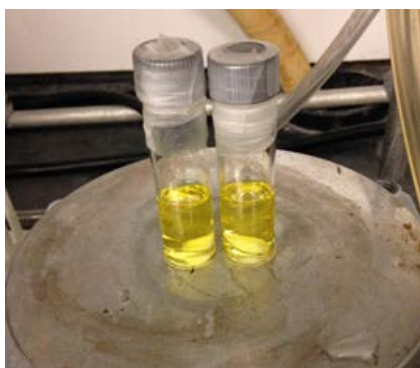

**Step 5:** Vial-cap juncture wrapped in parafilm immediately after argon sparging

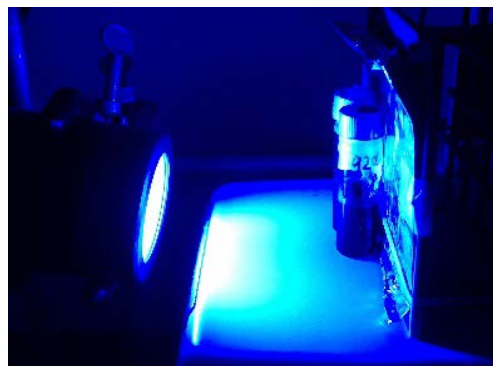

**Step 6:** Blue light irradiation with 1 x H150 blue Kessil grow lamp, 500 rpm, and fan for cooling



## Reaction Optimization Experiments

Optimization reactions were conducted on 0.3 mmol scale according to **General Procedure A**. Yields reported are from isolation.

**Table S1: Reaction Optimization Results**

| Entry | B equiv | Base                                           | Base equiv. | Catalyst          | Solvent [M]     | C (% yield) |
|-------|---------|------------------------------------------------|-------------|-------------------|-----------------|-------------|
| 1     | 3       | KOAc                                           | 3           | None              | DMF [0.1] M     | 0           |
| 2     | 3       | KOAc                                           | 3           | [Ir-1] (no light) | DMF [0.1] M     | 0           |
| 3     | 3       | KOAc                                           | 3           | [Ir-1]            | DMF [0.1] M     | 46          |
| 4     | 3       | NaOAc                                          | 3           | [Ir-1]            | DMF [0.1] M     | 42          |
| 5     | 3       | K <sub>2</sub> HPO <sub>4</sub>                | 3           | [Ir-1]            | DMF [0.1] M     | 23          |
| 6     | 3       | K <sub>2</sub> CO <sub>3</sub>                 | 3           | [Ir-1]            | DMF [0.1] M     | 11          |
| 7     | 3       | K <sub>3</sub> PO <sub>4</sub>                 | 3           | [Ir-1]            | DMF [0.1] M     | 41          |
| 8     | 3       | Pyridine                                       | 3           | [Ir-1]            | DMF [0.1] M     | 9           |
| 9     | 1       | KOAc                                           | 0.3         | [Ir-1]            | DMF [0.1] M     | 32          |
| 10    | 1       | PhCO <sub>2</sub> K                            | 0.3         | [Ir-1]            | DMF [0.1] M     | 41          |
| 11    | 1       | CF <sub>3</sub> CO <sub>2</sub> K              | 0.3         | [Ir-1]            | DMF [0.1] M     | 10          |
| 12    | 1       | K <sub>3</sub> PO <sub>4</sub>                 | 0.3         | [Ir-1]            | DMF [0.1] M     | 30          |
| 13    | 1       | Pyridine                                       | 0.3         | [Ir-1]            | DMF [0.1] M     | 0           |
| 14    | 1       | PhCO <sub>2</sub> K                            | 0.3         | [Ir-1]            | DMF [0.2] M     | 7           |
| 15    | 1       | PhCO <sub>2</sub> K                            | 0.3         | [Ir-1]            | DMF [0.4] M     | <5          |
| 16    | 1       | K <sub>3</sub> PO <sub>4</sub>                 | 0.3         | [Ir-1]            | DMSO [0.1] M    | 10          |
| 17    | 1       | K <sub>3</sub> PO <sub>4</sub>                 | 0.3         | [Ir-1]            | MeCN [0.1] M    | 11          |
| 18    | 1       | K <sub>3</sub> PO <sub>4</sub>                 | 0.3         | [Ir-1]            | THF [0.1] M     | 0           |
| 19    | 1       | PhCO <sub>2</sub> K                            | 0.3         | [Ir-1]            | THF:DMF [0.1] M | 30          |
| 20    | 1       | K <sub>3</sub> PO <sub>4</sub>                 | 0.3         | [Ir]-2            | DMF [0.1] M     | 0           |
| 21    | 1       | K <sub>3</sub> PO <sub>4</sub>                 | 0.3         | [Ir]-2            | DMF [0.1] M     | 0           |
| 22    | 1       | K <sub>3</sub> PO <sub>4</sub>                 | 0.3         | [Ru]-1            | DMF [0.1] M     | 0           |
| 23    | 1       | K <sub>3</sub> PO <sub>4</sub>                 | 0.3         | [Ru]-2            | DMF [0.1] M     | 0           |
| 24    | 1       | Pyridine                                       | 0.3         | AcrMe             | DMF [0.1] M     | 13          |
| 25    | 1       | K <sub>3</sub> PO <sub>4</sub> + <i>i</i> PrOH | 0.3 + 10    | [Ir-1]            | DMF [0.1] M     | 34          |
| 26    | 1       | DABCO                                          | 0.3         | [Ir-1]            | DMF [0.1] M     | <10         |
| 27    | 1       | Et <sub>3</sub> N                              | 0.3         | [Ir-1]            | DMF [0.1] M     | <10         |
| 28    | 1       | PhMe <sub>2</sub> SiH                          | 1           | [Ir-1]            | DMF [0.1] M     | <10         |
| 29    | 1       | (EtO) <sub>3</sub> SiH                         | 1           | [Ir-1]            | DMF [0.1] M     | <10         |
| 30    | 1       | 1,4-cyclohexadiene                             | 0.6         | [Ir-1]            | DMF [0.1] M     | 30          |

**Table S2: Photocatalyst Redox Potentials**

**Photocatalysts**

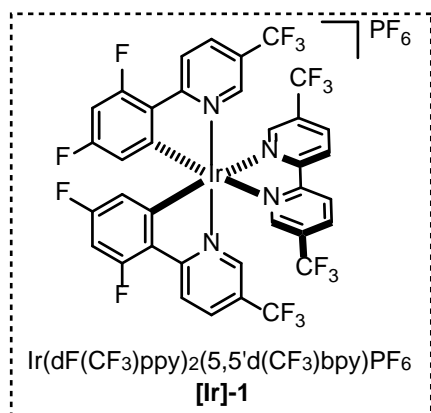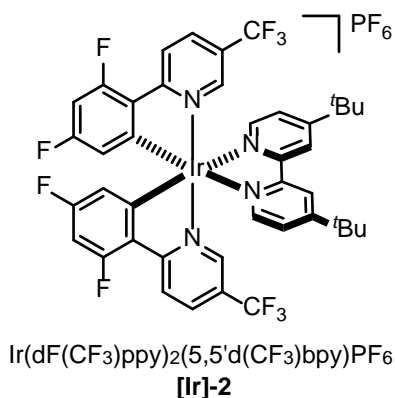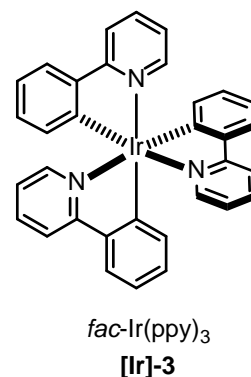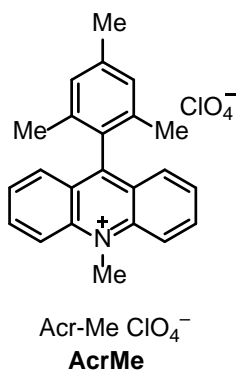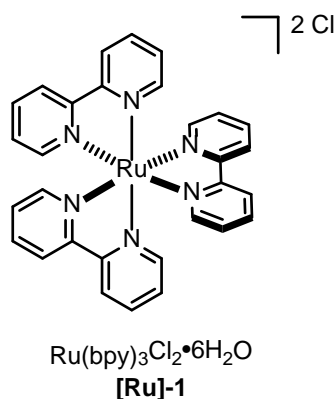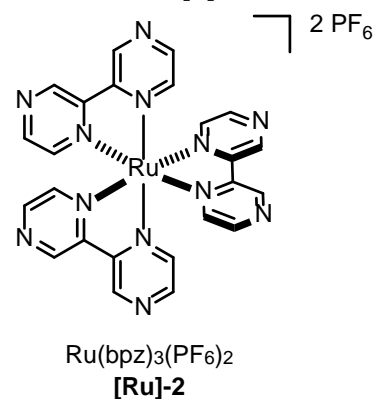

| Photocatalyst                                     | Reference | $\text{M}^+/\text{M}^*$ | $\text{M}^*/\text{M}^-$ | $\text{M}^+/\text{M}$ | $\text{M}/\text{M}^-$ |
|---------------------------------------------------|-----------|-------------------------|-------------------------|-----------------------|-----------------------|
| [Ir]-1                                            | (40)      | +1.68 V                 | -0.43 V                 | +1.94 V               | -0.69 V               |
| [Ir]-2                                            | (44)      | -1.21 V                 | +0.89 V                 | +1.69 V               | -1.37 V               |
| [Ir]-3                                            | (41)      | -1.73 V                 | +0.31 V                 | +0.77 V               | -2.19 V               |
| Acr-Me <sup>+</sup> ClO <sub>4</sub> <sup>-</sup> | (45)      | --                      | +1.88 V                 | --                    | -0.49 V               |
| [Ru]-1                                            | (41)      | -0.81 V                 | +0.77 V                 | +1.29 V               | -1.33 V               |
| [Ru]-2                                            | (41)      | -0.26 V                 | +1.45 V                 | +1.86 V               | -0.80 V               |

Electrochemical potentials reported vs. SCE reference electrode in MeCN Solvent.

**Table S3: Unreactive Substrates for Aminoarylation Reaction**

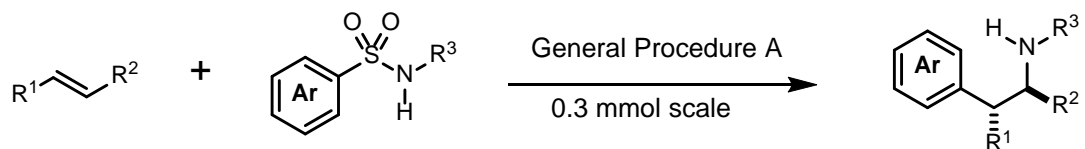

Alkenes Surveyed (39):

|                                          |      |      |      |      |      |
|------------------------------------------|------|------|------|------|------|
|                                          |      |      |      |      |      |
| $E_{p/2}$ =<br>(vs SCE in MeCN)          | 1.74 | 1.91 | 1.97 | 1.54 | 1.94 |
|                                          |      |      |      |      |      |
| $E_{p/2}$ (vs SCE) =<br>(vs SCE in MeCN) | 1.64 | 1.66 | 1.75 | 1.74 | 0.32 |

Attempted Sulfonamides:

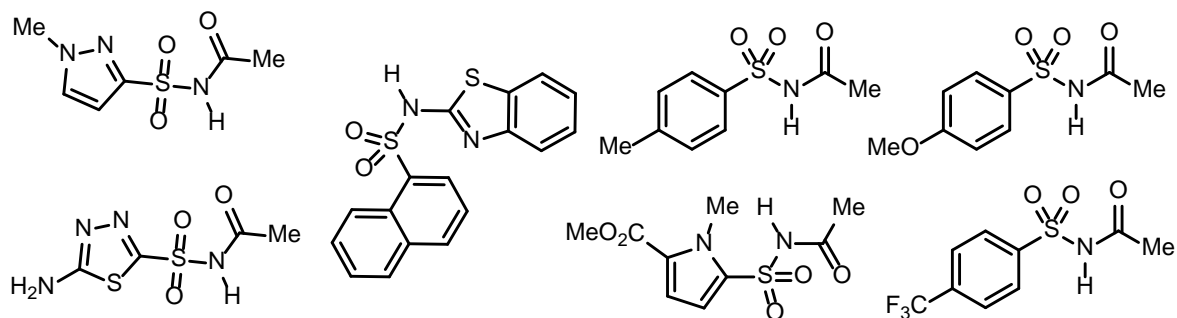

### **Figure S3: Strong base interaction with Ir(dF(CF<sub>3</sub>)ppy)<sub>2</sub>(5,5'-d(CF<sub>3</sub>)bpy)PF<sub>6</sub>**

#### Experimental Procedure

*UV-Vis:* A 25  $\mu$ M solution of Ir-1 in 2 mL of DMF was prepared by weighing 1.6 mg of Ir-1 into a volumetric flask and then diluting to 5 mL. The spectra of this solution was recorded. Separately, 1.7 mg of Ir-1 was weighed into a 5 mL volumetric flask followed by 7.7 mg of NaOtBu. The solids were then diluted in 5 mL of DMF and homogenized using a pipette. The spectra of the homogeneous solution was recorded.

*NMR titration:* To a 1 dram vial 2 mL of DMSO-d<sub>6</sub> and 5 mg of photocatalyst were mixed. Separately 3.36 mg of NaOtBu in 1 mL of DMSO-d<sub>6</sub> was prepared. Five solutions were prepared in standard NMR tubes by combining the following listed volumes.

| <b>Ir-1 volume (mL)</b> | <b>Base volume (mL)</b> | <b>Void Volume</b> | <b>total volume - 500 <math>\mu</math>L</b> |
|-------------------------|-------------------------|--------------------|---------------------------------------------|
| <b>0.4</b>              | 0                       | 0.1                | 0.5                                         |
| <b>0.4</b>              | 0.0125                  | 0.0875             | 0.5                                         |
| <b>0.4</b>              | 0.025                   | 0.075              | 0.5                                         |
| <b>0.4</b>              | 0.045                   | 0.0625             | 0.5                                         |
| <b>0.4</b>              | 0.05                    | 0.05               | 0.5                                         |

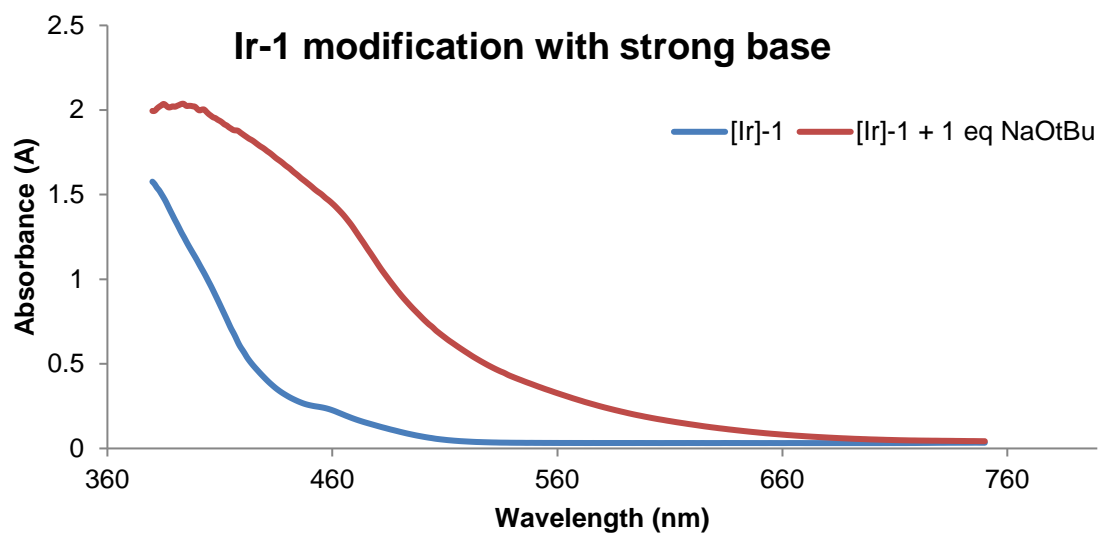

$^{19}\text{F}$  NMR (471 MHz, DMSO- $\text{D}_6$ ) for  $\text{Ir}(\text{dF}(\text{CF}_3)\text{ppy})_2(5,5'\text{d}(\text{CF}_3)\text{bpy})\text{PF}_6$

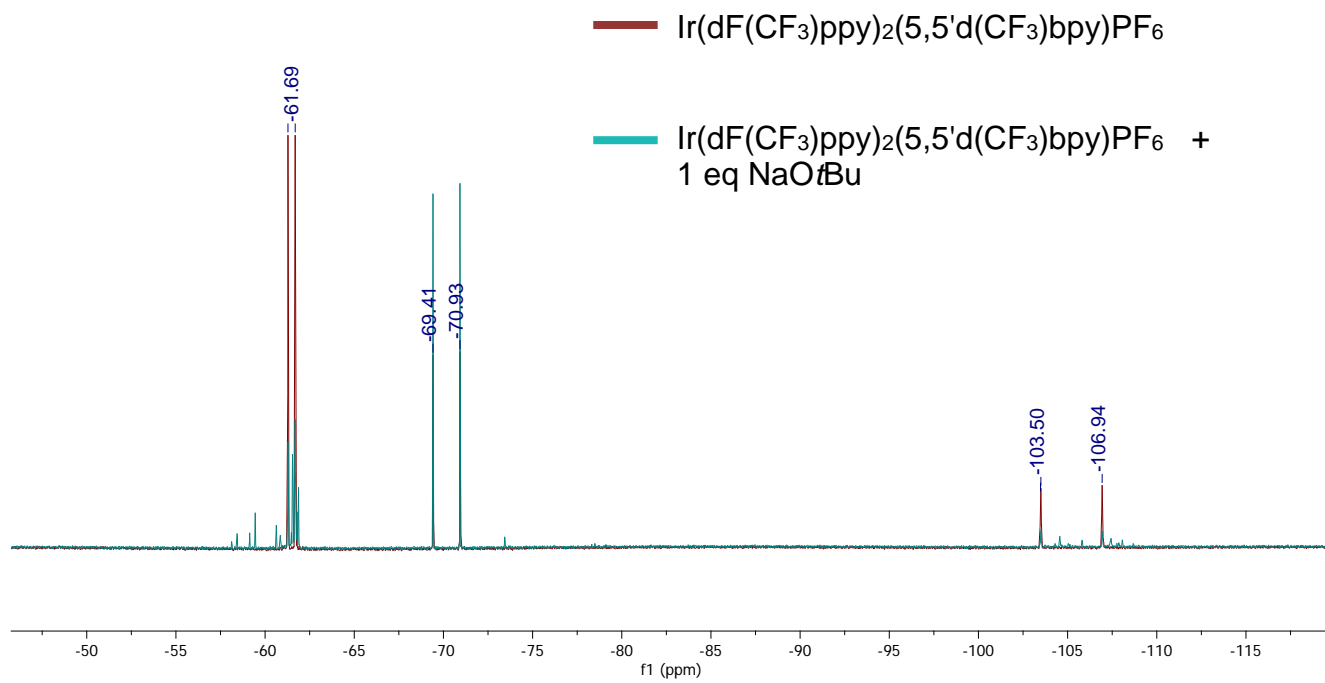

$^{19}\text{F}$  NMR (471 MHz,  $\text{DMSO-}d_6$ ) for  $\text{Ir}(\text{dF}(\text{CF}_3)\text{ppy})_2(5,5'\text{-d}(\text{CF}_3)\text{bpy})\text{PF}_6$

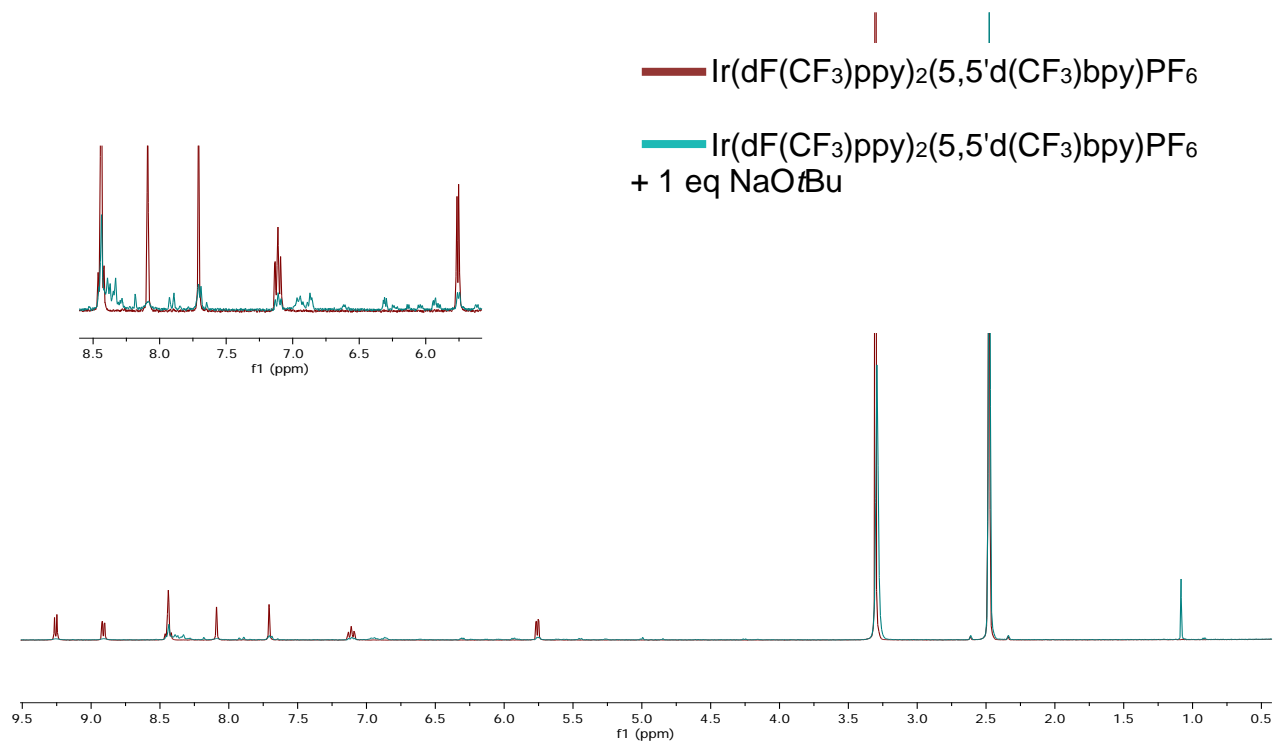

**Kinetic Profiling and Mechanism Elucidation Experiments**  
**Figure S4: Stern-Volmer Quenching Experiment**

Fluorescence quenching of [Ir]-1 was recorded with a Horiba Scientific Fluoromax 2 using DataMax software. Samples consisting of the noted concentrations were prepared and degassed by sparging with argon for 3 minutes prior to each measurement. The solutions were irradiated at 420 nm and luminescence was measured at 593 nm.  $I_0/I$  values were generated from the average of three scans taken per quencher concentration. The quenching studies were repeated three times. Potassium benzoate was not sufficiently soluble in DMF in order to run this analysis.

**Conclusion:** This quenching study supports the hypothesis of alkene activation over sulfonamide activation as the sulfonamide is not shown to quench the photocatalyst.

**Constant [Ir]-1, variable *E*-anethole**

| Run # | [Q] (mM) | scan 1  | scan 2  | scan 3  | average  | $I_0/I$  |
|-------|----------|---------|---------|---------|----------|----------|
| 1     | 0        | 1279652 | 1279595 | 1277671 | 1278973  | 1        |
|       | 0.5      | 1239028 | 1240121 | 1237808 | 1238986  | 1.032274 |
|       | 1        | 1198883 | 1201995 | 1197508 | 1199462  | 1.066289 |
|       | 2        | 1139567 | 1136768 | 1134669 | 1137001  | 1.124865 |
|       | 4        | 966005  | 967975  | 966423  | 966801   | 1.322891 |
|       | 5        | 915329  | 913206  | 913369  | 913968   | 1.399363 |
| 2     | 0        | 1338796 | 1335993 | 1333927 | 1336239  | 1        |
|       | 0.5      | 1299050 | 1296895 | 1293265 | 1296403  | 1.030728 |
|       | 1        | 1189198 | 1187756 | 1186116 | 1187690  | 1.125074 |
|       | 2        | 1112948 | 1111220 | 1111004 | 1111724  | 1.201952 |
|       | 4        | 1035308 | 1033016 | 1030568 | 1032964  | 1.293597 |
|       | 5        | 941187  | 939153  | 936440  | 938926.7 | 1.423156 |
| 3     | 0        | 1323583 | 1322346 | 1318529 | 1321486  | 1        |
|       | 0.5      | 1297235 | 1296530 | 1291170 | 1294978  | 1.02047  |
|       | 1        | 1235964 | 1233167 | 1231129 | 1233420  | 1.0714   |
|       | 2        | 1150680 | 1148221 | 1146468 | 1148456  | 1.150663 |
|       | 4        | 1026073 | 1023204 | 1019673 | 1022983  | 1.291796 |
|       | 5        | 936491  | 932451  | 930715  | 933219   | 1.416051 |



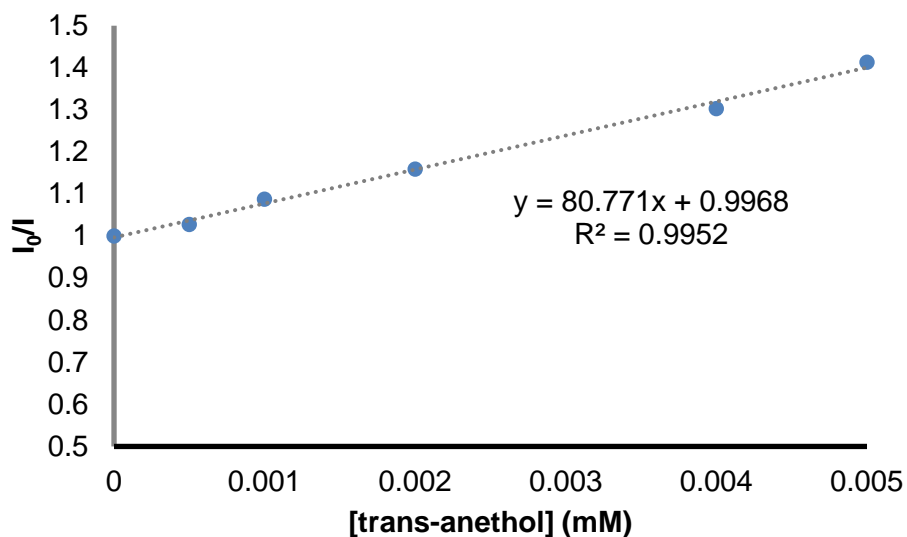

**Constant [Ir]-1, variable Z-anethole**

| Run #    | [Q] (mM) | scan 1  | scan 2  | scan 3  | average | I <sub>0</sub> /I |
|----------|----------|---------|---------|---------|---------|-------------------|
| <b>1</b> | 0        | 1563299 | 1568831 | 1563814 | 1565315 | 1                 |
|          | 0.0005   | 1506480 | 1502415 | 1505346 | 1504747 | 1.040251          |
|          | 0.001    | 1612968 | 1610825 | 1609429 | 1611074 | 0.971597          |
|          | 0.002    | 1277113 | 1278729 | 1279468 | 1278437 | 1.224398          |
|          | 0.004    | 1293512 | 1292485 | 1291087 | 1292361 | 1.211205          |
|          | 0.008    | 1132608 | 1130304 | 1125737 | 1129550 | 1.385786          |
| <b>2</b> | 0        | 1500716 | 1503267 | 1498616 | 1500866 | 1                 |
|          | 0.0005   | 1460206 | 1460267 | 1459212 | 1459895 | 1.028065          |
|          | 0.001    | 1353200 | 1352411 | 1350893 | 1352168 | 1.10997           |
|          | 0.002    | 1362804 | 1362675 | 1361090 | 1362190 | 1.101804          |
|          | 0.004    | 1296812 | 1295625 | 1290413 | 1294283 | 1.159612          |
|          | 0.008    | 1090574 | 1083777 | 1082080 | 1085477 | 1.382679          |
| <b>3</b> | 0        | 1452602 | 1453180 | 1450419 | 1452067 | 1                 |
|          | 0.0005   | 1513751 | 1509306 | 1513027 | 1512028 | 0.960344          |
|          | 0.001    | 1435001 | 1433724 | 1429664 | 1432796 | 1.01345           |
|          | 0.002    | 1361539 | 1356950 | 1352472 | 1356987 | 1.070067          |
|          | 0.004    | 1218421 | 1214864 | 1212004 | 1215096 | 1.195022          |
|          | 0.008    | 1110932 | 1102370 | 1099683 | 1104328 | 1.314887          |

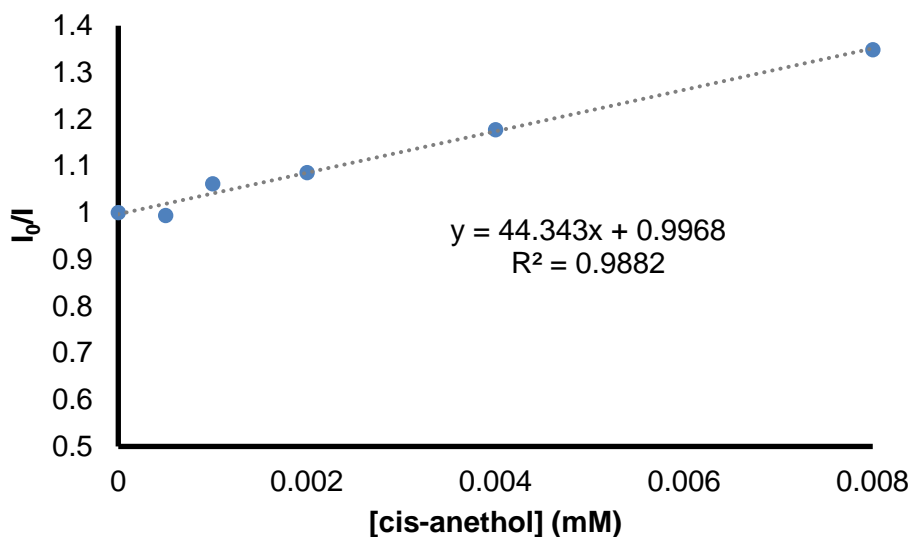

**Constant [I<sub>r</sub>]-1, variable sulfonylacetamide 2**

| Run #    | [Q] (mM) | scan 1  | scan 2  | scan 3  | average | I <sub>0</sub> /I |
|----------|----------|---------|---------|---------|---------|-------------------|
| <b>1</b> | 0        | 1379545 | 1379215 | 1379257 | 1379339 | 1                 |
|          | 0.5      | 1407231 | 1408755 | 1404343 | 1406776 | 0.980496          |
|          | 1        | 1421023 | 1419515 | 1420010 | 1420183 | 0.971241          |
|          | 2        | 1241674 | 1242138 | 1238751 | 1240854 | 1.111604          |
|          | 4        | 1369068 | 1368141 | 1369533 | 1368914 | 1.007616          |
|          | 8        | 1345129 | 1344560 | 1346924 | 1345538 | 1.025121          |
| <b>2</b> | 0        | 1315329 | 1314718 | 1314642 | 1314896 | 1                 |
|          | 0.5      | 1365594 | 1362761 | 1365947 | 1364767 | 0.963458          |
|          | 1        | 1358677 | 1357730 | 1356903 | 1357770 | 0.968423          |
|          | 2        | 1311015 | 1312800 | 1314739 | 1312851 | 1.001558          |
|          | 4        | 1358471 | 1359711 | 1361332 | 1359838 | 0.966951          |
|          | 8        | 1368996 | 1366131 | 1365807 | 1366978 | 0.9619            |
| <b>3</b> | 0        | 1285963 | 1286332 | 1284033 | 1285443 | 1                 |
|          | 0.5      | 1426932 | 1427614 | 1425122 | 1426556 | 0.901081          |
|          | 1        | 123400  | 1423014 | 1422116 | 989510  | 1.29907           |
|          | 2        | 1349385 | 1348451 | 1345525 | 1347787 | 0.953743          |
|          | 4        | 1370793 | 1367963 | 1372327 | 1370361 | 0.938032          |
|          | 5        | 1363714 | 1366155 | 1361547 | 1363805 | 0.942541          |

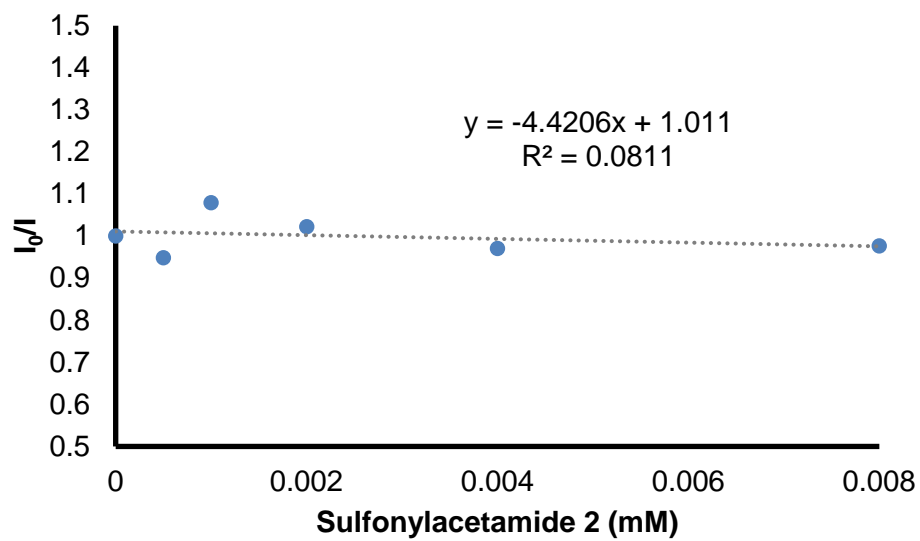

**Figure S5: Reaction Profile and Initial Rates for Aminoarylation with vinyl-Anisole**

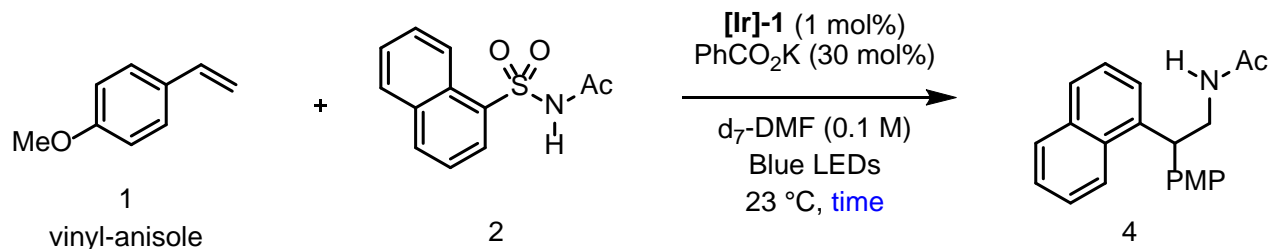

To a flame dried 2-dram vial, equipped with a teflon coated oval shaped stir bar, was added vinyl-anisole (20.1 mg, 0.15 mmol), *N*-(1-naphthylsulfonyl)acetamide (37.4 mg, 0.15 mmol), potassium benzoate (7.21 mg, 30 mol%), and Ir(dF(CF<sub>3</sub>)ppy)<sub>2</sub>(5,5'-d(CF<sub>3</sub>)bpy)PF<sub>6</sub> (1.5 mg, 1 mol%). The vial contents were then dissolved in anhydrous d<sub>7</sub>-DMF (1.5 mL, 0.1 M) followed by addition of trimethyl(phenyl)silane (8.52 μL, 0.05 mmol) as an internal standard. The reaction was sparged under argon for 15 min before the 1.5 mL solution volume was equally separated between 3 argon sparged NMR tubes (0.5 mL each). The tubes were quickly capped and sealed with parafilm. Time zero (*t*<sub>0</sub>) <sup>1</sup>H-NMR measurements were taken of all three samples prior to irradiation. Then, the 3 NMR tubes were irradiated with 1 x blue H150 Kessil LED light (~2 cm) and cooled by one overhead fan. After the allotted time (i.e. 5, 10, 15, 20... min), the light was turned off and reaction solution analyzed by <sup>1</sup>H-NMR.

**Analysis:** The concentrations and yields for the aminoarylation substrates and product were plotted against time in minutes. The slope through five points for the first ~20% reaction conversion was utilized to calculate the initial rates of reaction. The procedure was repeated in triplicate (3 <sup>1</sup>H-NMR measurements) and the average of these three trials was determined. Calculated values are tabulated below.

**Aminoarylation Reaction Profile with vinyl-anisole**  
**([M] vs. time)**

| min | Avg. 3 trials [M] (mmol/mL) |                    |                         |
|-----|-----------------------------|--------------------|-------------------------|
|     | Product Formation           | Alkene Consumption | Sulfonamide Consumption |
| 0   | 0.0000                      | 0.12633            | 0.10133                 |
| 5   | 0.0020                      | 0.12433            | 0.09967                 |
| 10  | 0.0027                      | 0.12267            | 0.09933                 |
| 15  | 0.0030                      | 0.12133            | 0.09867                 |
| 30  | 0.0087                      | 0.11733            | 0.09433                 |
| 45  | 0.0144                      | 0.10567            | 0.08467                 |
| 60  | 0.0214                      | 0.09767            | 0.07800                 |
| 90  | 0.0328                      | 0.08833            | 0.06567                 |
| 180 | 0.0455                      | 0.02500            | 0.05233                 |
| 240 | 0.0488                      | 0.01733            | 0.04933                 |
| 300 | 0.0501                      | 0.01200            | 0.04667                 |
| 360 | 0.0495                      | 0.00500            | 0.04700                 |

**Plotted Aminoarylation Reaction Profile with vinyl-anisole**  
**([M] vs. time)**

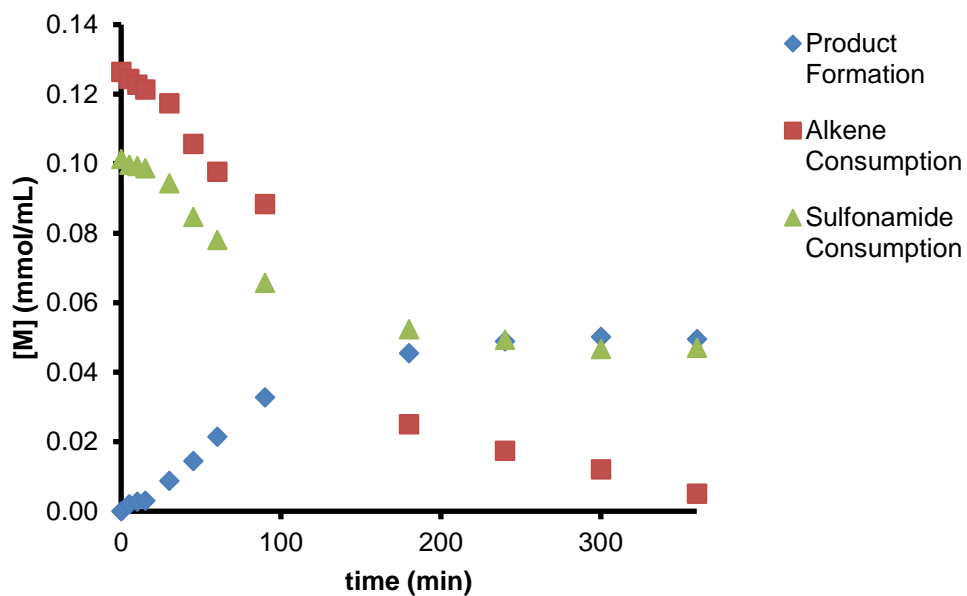

**Plotted Aminoarylation Reaction Profile with vinyl-anisole**  
(yield vs. time)

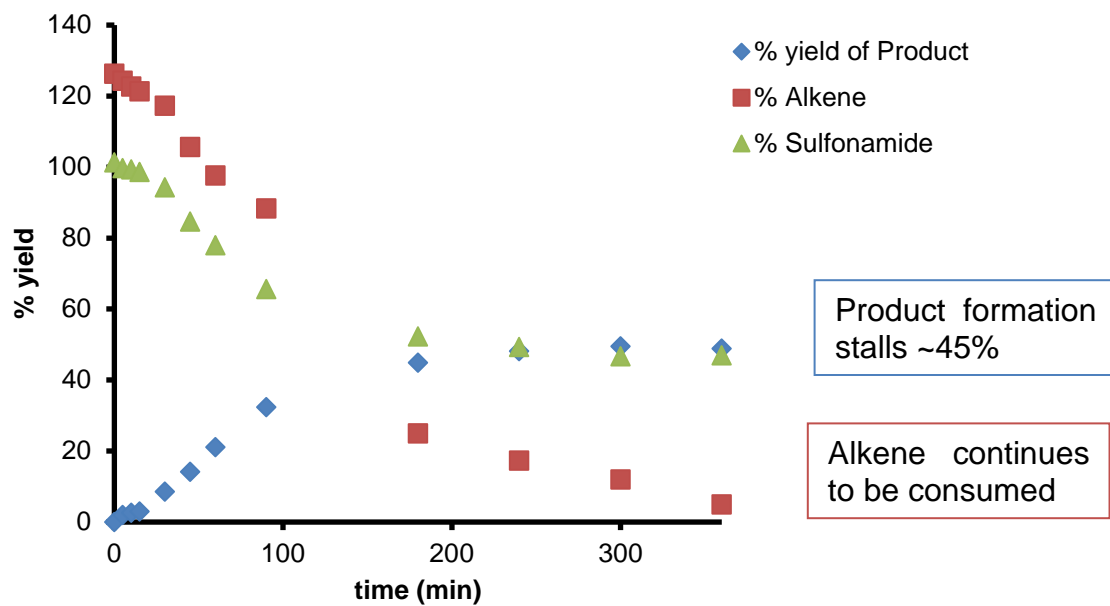

**Plotted Initial Rates for Aminoarylation with vinyl-anisole  
([M] vs. time)**

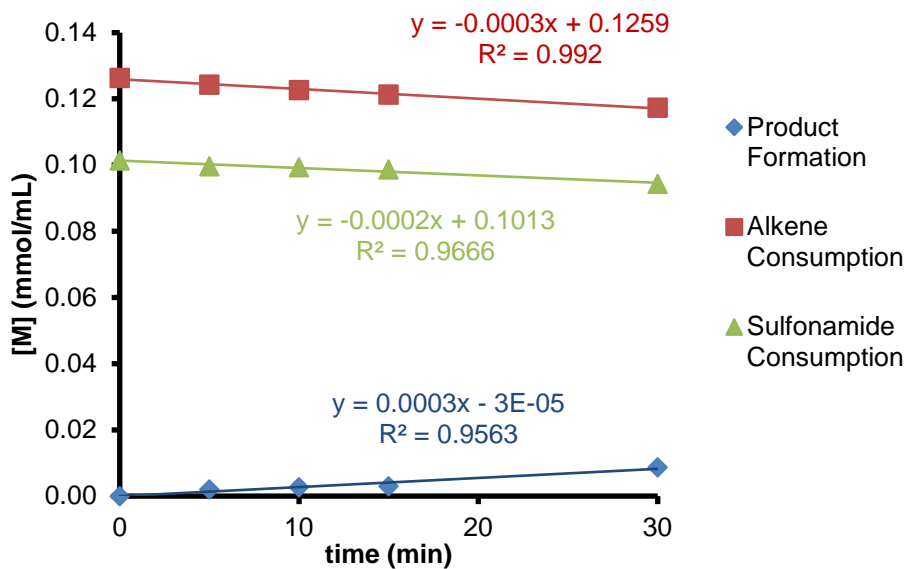

|                                         | Average of 3 trials |                           |                         |
|-----------------------------------------|---------------------|---------------------------|-------------------------|
|                                         | Product Formation   | Vinyl-Anisole Consumption | Sulfonamide Consumption |
| Initial rate ([M] • min <sup>-1</sup> ) | 0.0003              | -0.0003                   | -0.0002                 |
| R <sup>2</sup>                          | 0.9563              | 0.9920                    | 0.9666                  |

**Figure S6: Reaction Profile and Initial Rates for Aminoarylation with *trans*-Anethole**

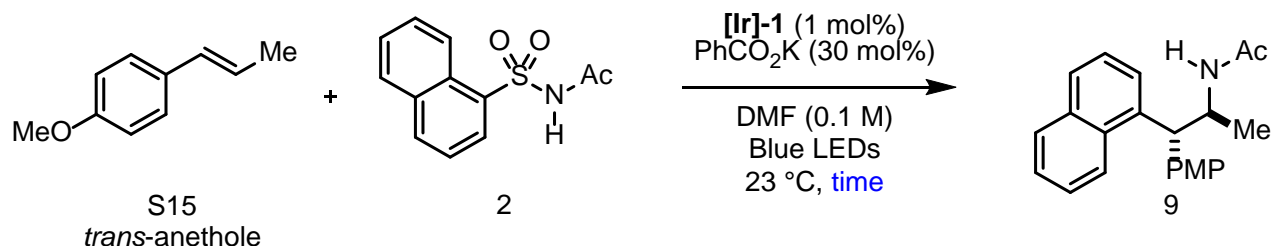

To a flame dried 2-dram vial, equipped with a teflon coated oval shaped stir bar, was added *trans*-anethole (54  $\mu$ L, 0.36 mmol), *N*-(1-naphthylsulfonyl)acetamide (75 mg, 0.3 mmol), potassium benzoate (14.4 mg, 30 mol%), and Ir(dF(CF<sub>3</sub>)ppy)<sub>2</sub>(5,5'-d(CF<sub>3</sub>)bpy)PF<sub>6</sub> (3 mg, 1 mol%). The vial contents were then dissolved in anhydrous DMF (3 mL, 0.1 M) followed by addition of trimethyl(phenyl)silane (17  $\mu$ L, 0.1 mmol) as an internal standard. The reaction was sparged under argon for 15 min before the 3 mL solution volume was equally separated between 3 argon sparged NMR tubes (1 mL each). The tubes were quickly capped and sealed with parafilm. Time zero ( $t_0$ ) <sup>1</sup>H-NMR measurements were taken of all three samples prior to irradiation. Then, the 3 NMR tubes were irradiated with 1 x blue H150 Kessil LED light (~2 cm) and cooled by one overhead fan. After the allotted time (i.e. 5, 10, 15, 20... min), the light was turned off and reaction solution analyzed by <sup>1</sup>H-NMR.

**Analysis:** The concentrations and yields for the aminoarylation substrates and product were plotted against time in minutes. The slope through five points for the first ~20% reaction conversion was utilized to calculate the initial rates of reaction. The procedure was repeated in triplicate (3 <sup>1</sup>H-NMR measurements) and the average of these three trials was determined. Calculated values are tabulated below.



**Aminoarylation Reaction Profile with trans-Anethole**  
**([M] vs. time)**

| min | Avg. of 3 trials [M] (mmol/mL) |                    |                         |
|-----|--------------------------------|--------------------|-------------------------|
|     | Product Formation              | Alkene Consumption | Sulfonamide Consumption |
| 0   | 0.0000                         | 0.1170             | 0.1027                  |
| 5   | 0.0060                         | 0.0990             | 0.0880                  |
| 10  | 0.0151                         | 0.0950             | 0.0860                  |
| 15  | 0.0205                         | 0.0827             | 0.0767                  |
| 30  | 0.0373                         | 0.0607             | 0.0603                  |
| 45  | 0.0497                         | 0.0510             | 0.0500                  |
| 60  | 0.0571                         | 0.0413             | 0.0407                  |
| 120 | 0.0644                         | 0.0240             | 0.0183                  |
| 180 | 0.0725                         | 0.0240             | 0.0147                  |
| 240 | 0.0745                         | 0.0167             | 0.0083                  |
| 300 | 0.0795                         | 0.0100             | 0.0050                  |
| 360 | 0.0812                         | 0.0050             | 0.0050                  |

**Plotted Aminoarylation Reaction Profile with trans-Anethole**  
**([M] vs. time)**

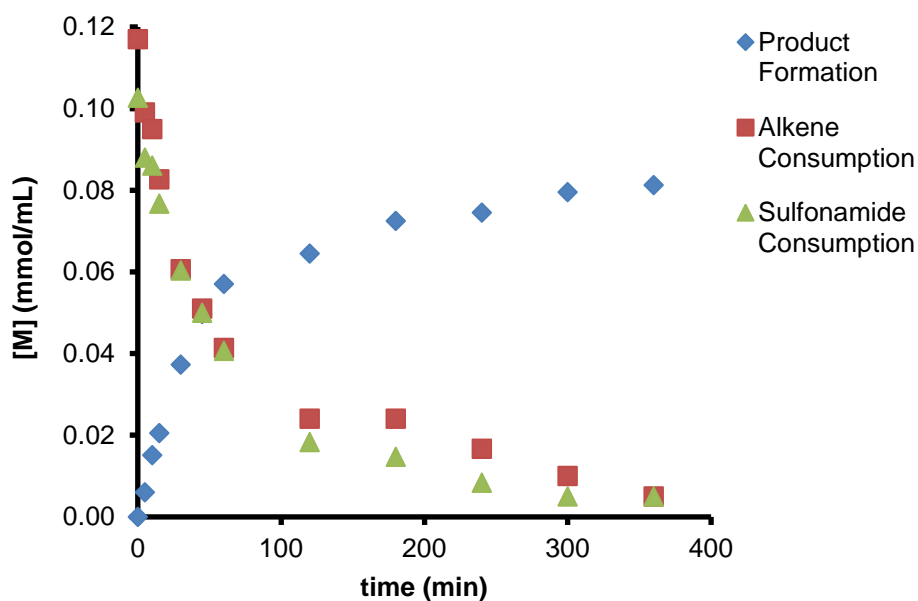

**Plotted Aminoarylation Reaction Profile with *trans*-Anethole  
(yield vs. time)**

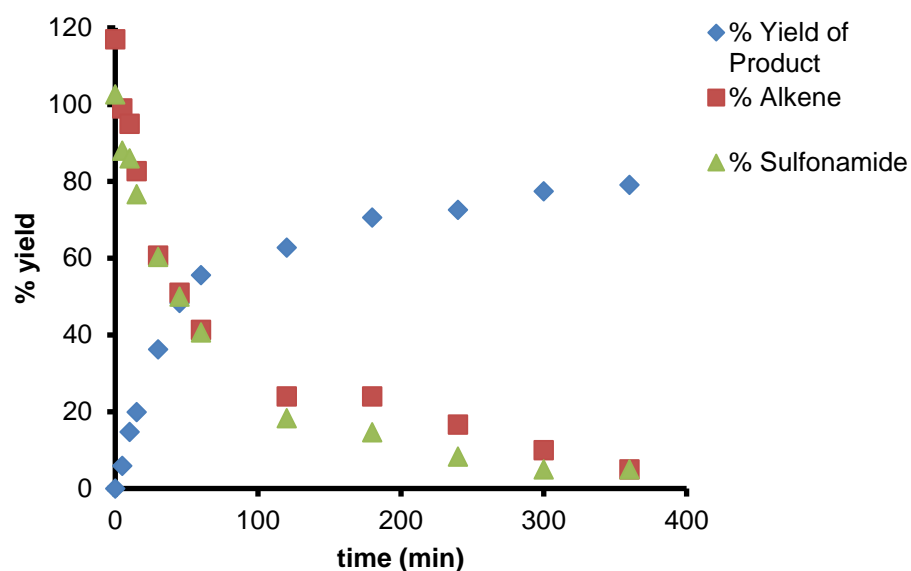

**Plotted Initial Rates for Aminoarylation with *trans*-Anethole  
([M] vs. time)**

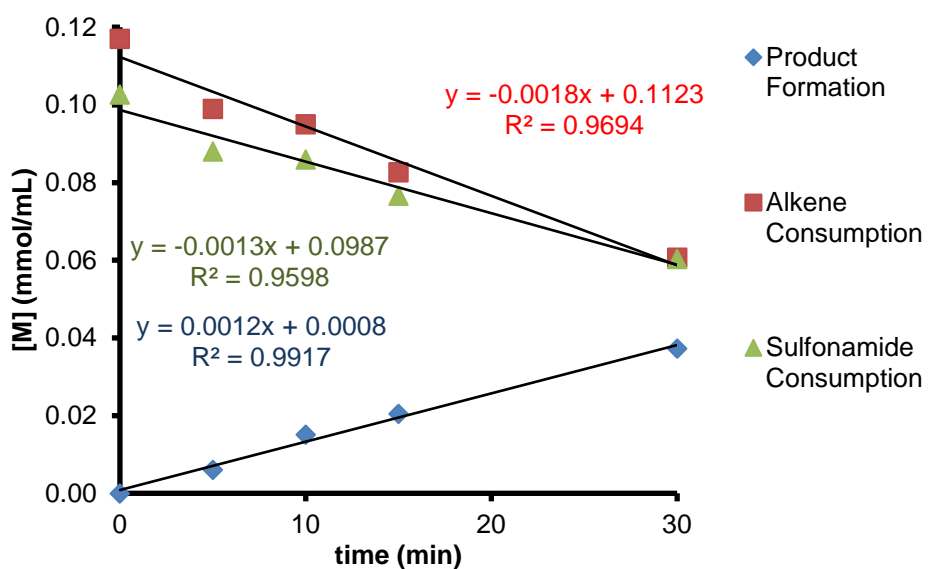

|                                         | Average of 3 trials |                                    |                         |
|-----------------------------------------|---------------------|------------------------------------|-------------------------|
|                                         | Product Formation   | <i>trans</i> -Anethole Consumption | Sulfonamide Consumption |
| Initial rate ([M] • min <sup>-1</sup> ) | 0.0012              | -0.0018                            | -0.0013                 |
| R <sup>2</sup>                          | 0.9917              | 0.9694                             | 0.9598                  |

**Figure S7: Reaction Profile and Initial Rates for Aminoarylation with *cis*-Anethole**

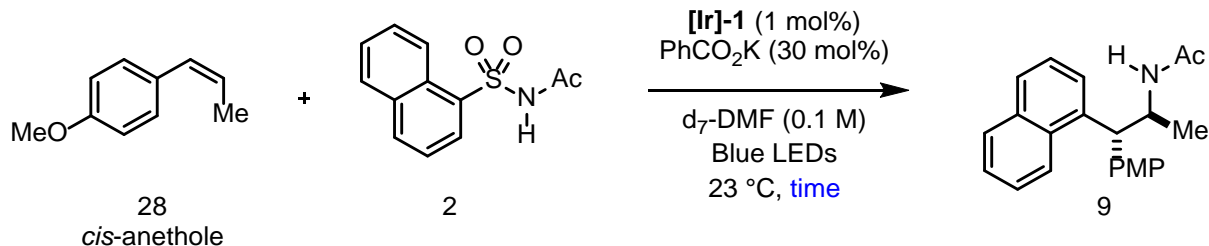

To a flame dried 2-dram vial, equipped with a teflon coated oval shaped stir bar, was added *cis*-anethole (35.6 mg, 0.24 mmol), *N*-(1-naphthylsulfonyl)acetamide (49.9 mg, 0.2 mmol), potassium benzoate (9.61 mg, 30 mol%), and Ir(dF(CF<sub>3</sub>)ppy)<sub>2</sub>(5,5'-d(CF<sub>3</sub>)bpy)PF<sub>6</sub> (2 mg, 1 mol%). The vial contents were then dissolved in anhydrous d<sub>7</sub>-DMF (2 mL, 0.1 M) followed by addition of trimethyl(phenyl)silane (11.4 μL, 0.066 mmol) as an internal standard. The reaction was sparged under argon for 15 min before the 2 mL solution volume was equally separated between 3 argon sparged NMR tubes (0.67 mL each). The tubes were quickly capped and sealed with parafilm. Time zero (*t*<sub>0</sub>) <sup>1</sup>H-NMR measurements were taken of all three samples prior to irradiation. Then, the 3 NMR tubes were irradiated with 1 x blue H150 Kessil LED light (~2 cm) and cooled by one overhead fan. After the allotted time (i.e. 5, 10, 15, 20... min), the light was turned off and reaction solution analyzed by <sup>1</sup>H-NMR.

**Analysis:** The concentrations and yields for the aminoarylation substrates and product were plotted against time in minutes. The slope through five points for the first ~20% reaction conversion was utilized to calculate the initial rates of reaction. The procedure was repeated in triplicate (3 <sup>1</sup>H-NMR measurements) and the average of these three trials was determined. Calculated values are tabulated below.

**Aminoarylation Reaction Profile with *cis*-Anethole**  
**([M] vs. time)**

|     | Avg. of 3 trials [M] (mmol/mL) |                                  |                         |                                  |
|-----|--------------------------------|----------------------------------|-------------------------|----------------------------------|
| min | Product Formation              | <i>cis</i> -Anethole Consumption | Sulfonamide Consumption | <i>trans</i> -Anethole Formation |
| 0   | 0.0000                         | 0.0617                           | 0.0743                  | 0.0000                           |
| 5   | 0.0070                         | 0.0527                           | 0.0703                  | 0.0113                           |
| 10  | 0.0123                         | 0.0463                           | 0.0633                  | 0.0170                           |
| 15  | 0.0160                         | 0.0400                           | 0.0590                  | 0.0193                           |
| 20  | 0.0200                         | 0.0360                           | 0.0533                  | 0.0220                           |
| 30  | 0.0260                         | 0.0290                           | 0.0477                  | 0.0240                           |
| 45  | 0.0333                         | 0.0220                           | 0.0383                  | 0.0247                           |
| 60  | 0.0377                         | 0.0173                           | 0.0337                  | 0.0247                           |
| 120 | 0.0460                         | 0.0103                           | 0.0233                  | 0.0220                           |
| 180 | 0.0484                         | 0.0077                           | 0.0207                  | 0.0197                           |
| 240 | 0.0510                         | 0.0060                           | 0.0120                  | 0.0153                           |
| 300 | 0.0540                         | 0.0000                           | 0.0067                  | 0.0137                           |

**Plotted Aminoarylation Reaction Profile with *cis*-Anethole**  
**([M] vs. time)**

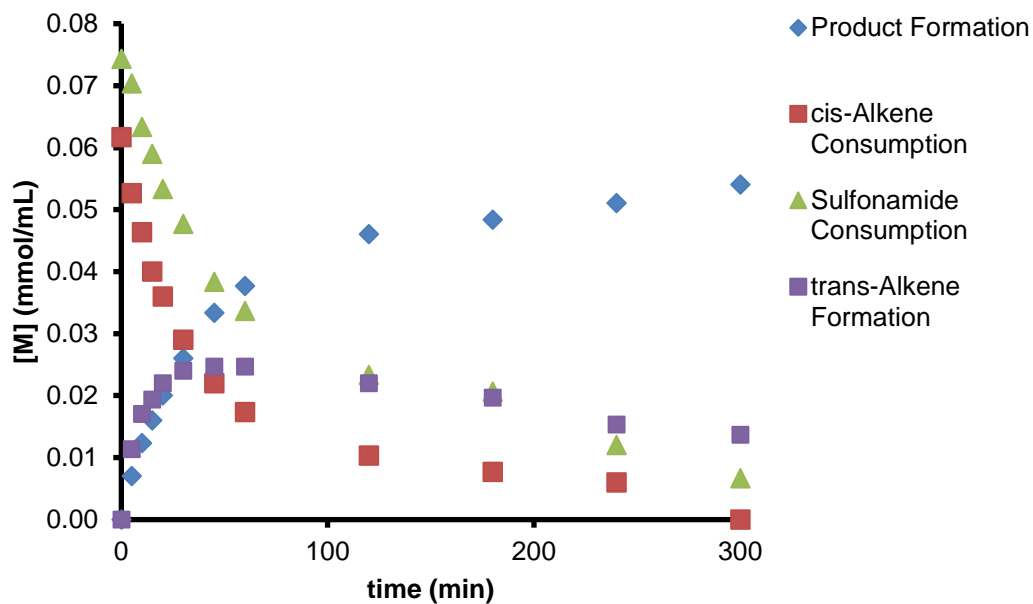

**Plotted Aminoarylation Reaction Profile with *cis*-Anethole  
(yield vs. time)**

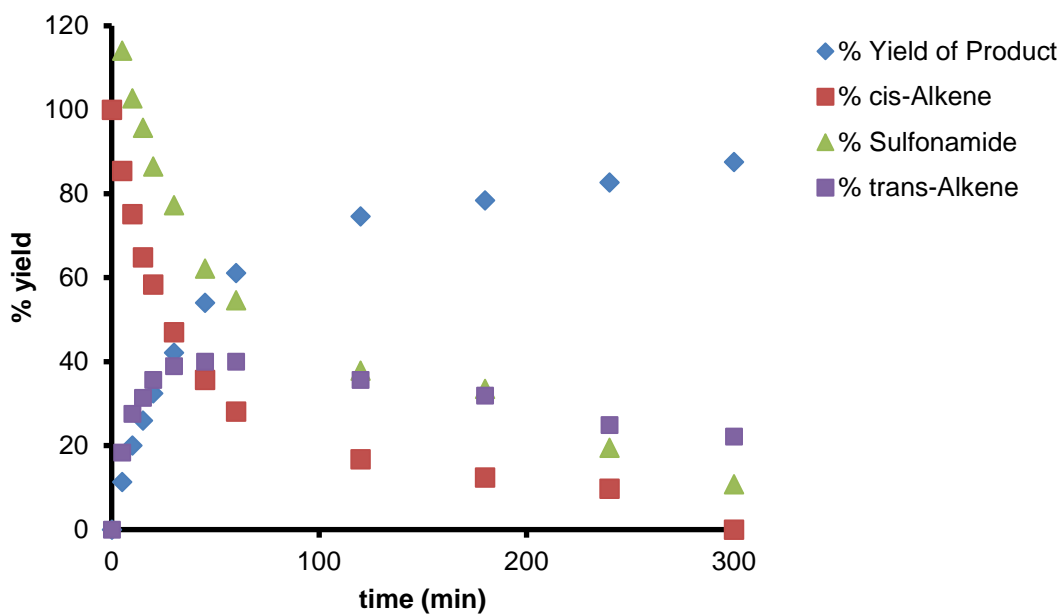

**Plotted Initial Rates for Aminoarylation with *cis*-Anethole  
([M] vs. time)**

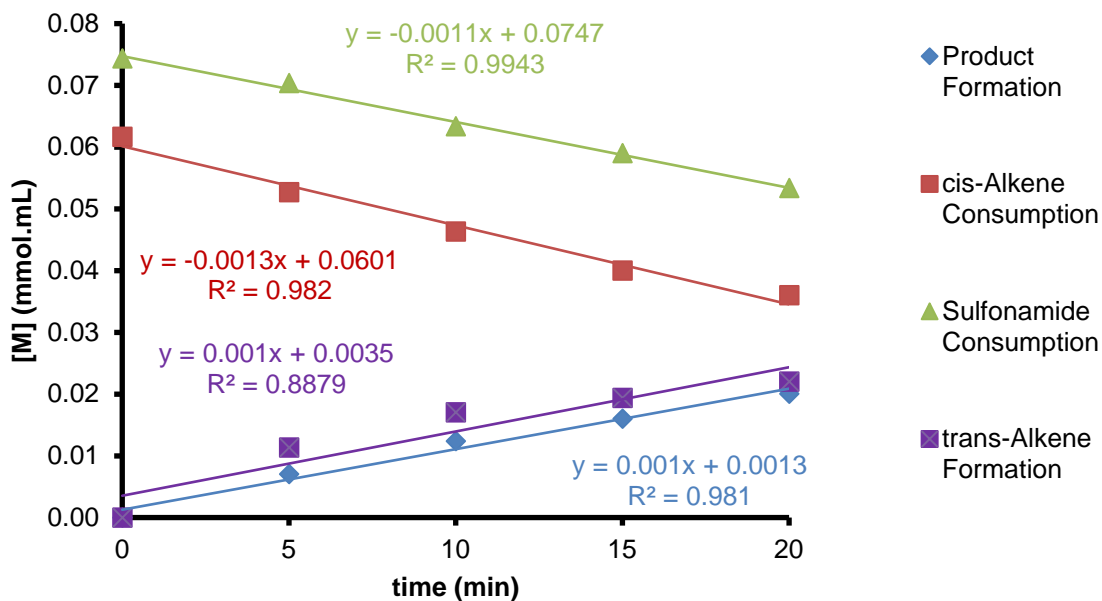

|                                         | Average of 3 trials |                                  |                         |                                  |
|-----------------------------------------|---------------------|----------------------------------|-------------------------|----------------------------------|
|                                         | Product Formation   | <i>cis</i> -Anethole Consumption | Sulfonamide Consumption | <i>trans</i> -Anethole Formation |
| Initial rate ([M] • min <sup>-1</sup> ) | 0.0010              | -0.0013                          | -0.0011                 | -0.0010                          |
| R <sup>2</sup>                          | 0.9810              | 0.9820                           | 0.9943                  | 0.8879                           |

**Figure S8: Reaction Profile and Initial Rates for Alkene Isomerization with *trans*-Anethole**

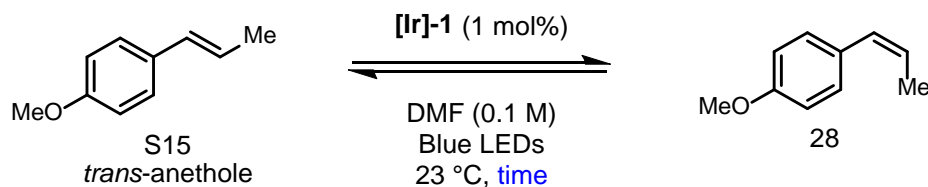

To a flame dried 2-dram vial, equipped with a teflon coated oval shaped stir bar, was added *trans*-anethole (14.8 mg, 0.1 mmol) and Ir(dF(CF<sub>3</sub>)ppy)<sub>2</sub>(5,5'-d(CF<sub>3</sub>)bpy)PF<sub>6</sub> (1 mg, 1 mol%). The vial contents were then dissolved in anhydrous d<sub>7</sub>-DMF (1 mL, 0.1 M) followed by addition of trimethyl(phenyl)silane (5.68 μL, 0.033 mmol) as an internal standard. The reaction was sparged under argon for 15 min before the 1 mL solution volume was equally separated between 2 argon sparged NMR tubes (0.5 mL each). The tubes were quickly capped and sealed with parafilm. Time zero (*t*<sub>0</sub>) <sup>1</sup>H-NMR measurements were taken of both samples prior to irradiation. Then, the 2 NMR tubes were irradiated with 1 x blue H150 Kessil LED light (~2 cm) and cooled by one overhead fan. After the allotted time (i.e. 10, 15, 20... min), the light was turned off and reaction solution analyzed by <sup>1</sup>H-NMR.

**Analysis:** The alkene yields for the isomerization were plotted against time in minutes. The slope through five points for the first ~20% reaction conversion was utilized to calculate the initial rate of isomerization. The procedure was repeated and the average of these two trials was determined. Calculated values are tabulated below.

| Average of 2 trials |                          |                        |
|---------------------|--------------------------|------------------------|
| min                 | % <i>trans</i> -anethole | % <i>cis</i> -anethole |
| 0                   | 100.00                   | 0.00                   |
| 10                  | 96.86                    | 6.73                   |
| 15                  | 89.69                    | 12.56                  |
| 20                  | 82.96                    | 16.14                  |
| 30                  | 76.68                    | 30.04                  |
| 45                  | 63.23                    | 38.12                  |
| 60                  | 53.81                    | 44.39                  |
| 120                 | 40.36                    | 51.12                  |
| 180                 | 40.81                    | 50.67                  |



**Plotted Isomerization Reaction Profile with *cis*-Anethole  
(yield vs. time)**

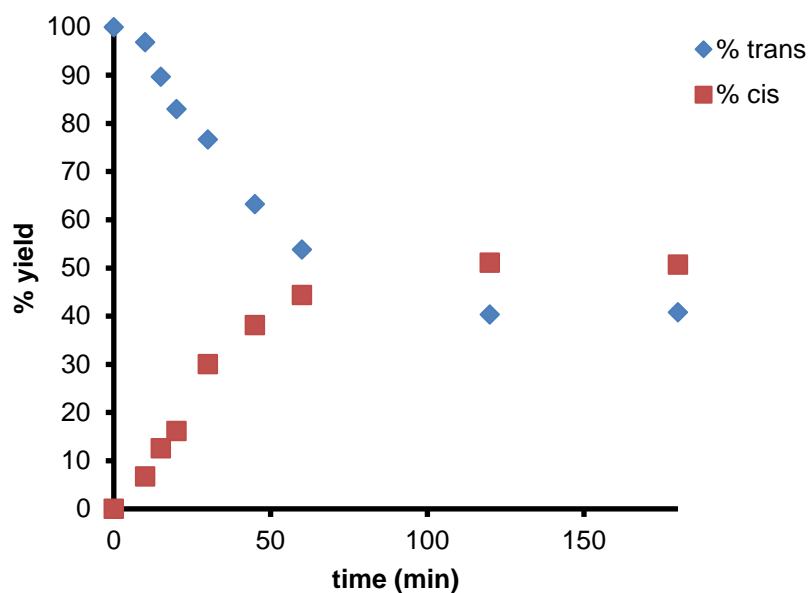

**Plotted Initial Rates for Isomerization with *cis*-Anethole  
([M] vs. time)**

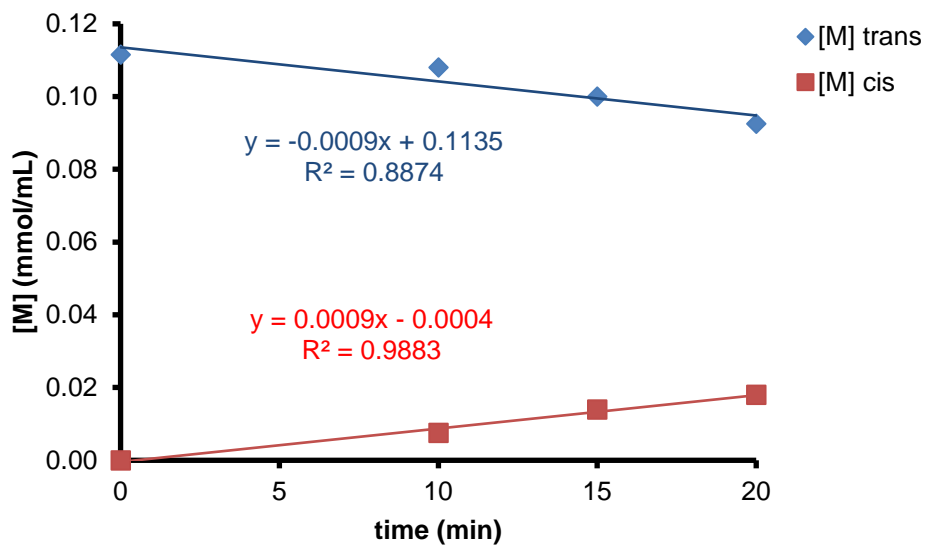

|                                                  | <b>Avg. of 2 trials</b> |                            |
|--------------------------------------------------|-------------------------|----------------------------|
|                                                  | cis-Anethole Formation  | trans-Anethole Consumption |
| <b>Initial rate<br/>([M] • min<sup>-1</sup>)</b> | 0.0009                  | -0.0009                    |
| <b>R<sup>2</sup></b>                             | 0.9883                  | 0.8874                     |

**Figure S9: Reaction Profile for Alkene Isomerization with *cis*-Anethole**

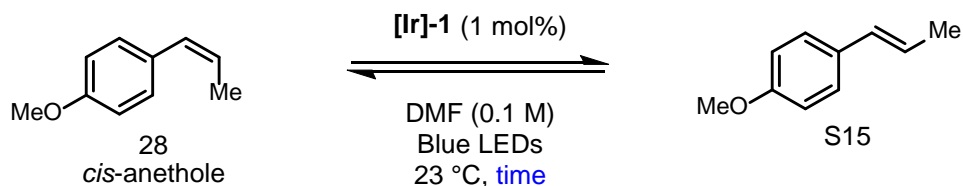

To a flame dried 2-dram vial, equipped with a teflon coated oval shaped stir bar, was added *cis*-anethole (14.8 mg, 0.1 mmol) and Ir(dF(CF<sub>3</sub>)ppy)<sub>2</sub>(5,5'-d(CF<sub>3</sub>)bpy)PF<sub>6</sub> (1 mg, 1 mol%). The vial contents were then dissolved in anhydrous d<sub>7</sub>-DMF (1 mL, 0.1 M) followed by addition of trimethyl(phenyl)silane (5.68 μL, 0.033 mmol) as an internal standard. The reaction was sparged under argon for 15 min before the 1 mL solution volume was equally separated between 2 argon sparged NMR tubes (0.5 mL each). The tubes were quickly capped and sealed with parafilm. Time zero (*t*<sub>0</sub>) <sup>1</sup>H-NMR measurements were taken of both samples prior to irradiation. Then, the 2 NMR tubes were irradiated with 1 x blue H150 Kessil LED light (~2 cm) and cooled by one overhead fan. After the allotted time (i.e. 10, 15, 20... min), the light was turned off and reaction solution analyzed by <sup>1</sup>H-NMR.

**Analysis:** The alkene yields for the isomerization were plotted against time in minutes. Because the isomerization of *cis*-*trans* anethole is so rapid, initial rates could not be determined. Qualitatively, these isomerization studies suggest the following:

**Plotted Isomerization Reaction Profile with *trans*-Anethole  
(yield vs. time)**

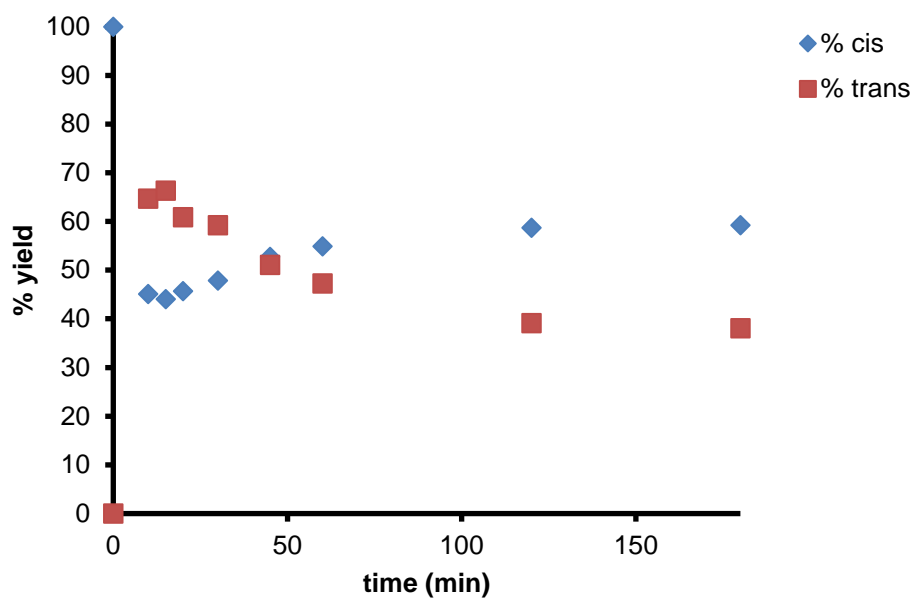

|     | Average of 2 trials |         |
|-----|---------------------|---------|
| min | % cis               | % trans |
| 0   | 100.00              | 0.00    |
| 10  | 45.11               | 64.67   |
| 15  | 44.02               | 66.30   |
| 20  | 45.65               | 60.87   |
| 30  | 47.83               | 59.24   |
| 45  | 52.72               | 51.09   |
| 60  | 54.89               | 47.28   |
| 120 | 58.70               | 39.13   |
| 180 | 59.24               | 38.04   |

**Plotted Isomerization Reaction Profile for 10 min with *trans*-Anethole  
(yield vs. time)**

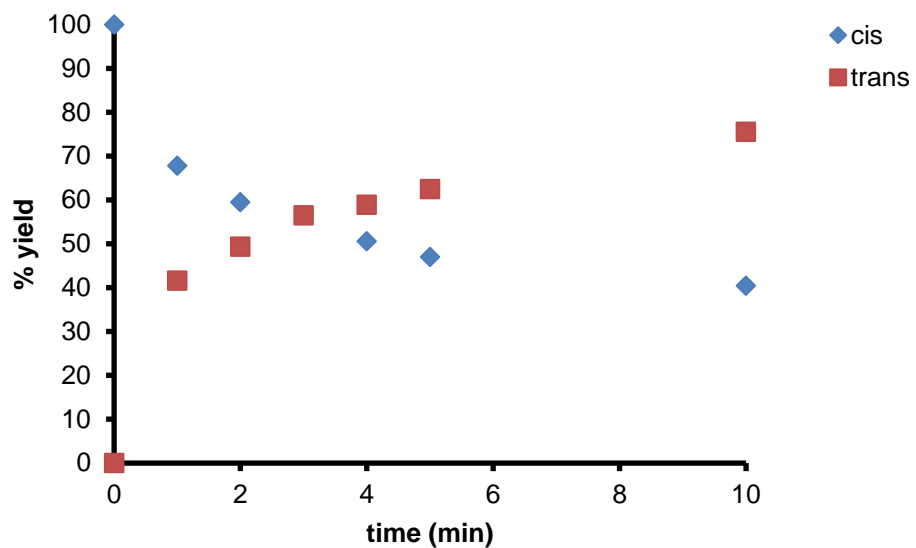

|           | Average of 2 trials |         |
|-----------|---------------------|---------|
| min       | % cis               | % trans |
| <b>0</b>  | 100.00              | 0.00    |
| <b>1</b>  | 67.86               | 41.67   |
| <b>2</b>  | 59.52               | 49.40   |
| <b>3</b>  | 56.55               | 56.55   |
| <b>4</b>  | 50.60               | 58.93   |
| <b>5</b>  | 47.02               | 62.50   |
| <b>10</b> | 40.48               | 75.60   |

**Figure S10: Determination of Photostationary State Between *cis*-Anethole and *trans*-Anethole**

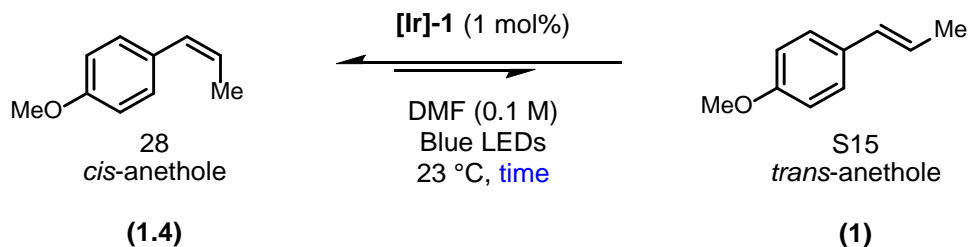

The following isomeric ratios were extrapolated from the above alkene isomerization experiments. The *cis:trans* ratios were taken from  $t_{\text{final}}$  (180 min) once the equilibrium state between the two isomers had been observed.

| Time (minutes)           | From <i>trans</i> to <i>cis</i> |                | From <i>cis</i> to <i>trans</i> |                |
|--------------------------|---------------------------------|----------------|---------------------------------|----------------|
|                          | % <i>cis</i>                    | % <i>trans</i> | % <i>cis</i>                    | % <i>trans</i> |
| <b>180</b>               | 50.67                           | 40.81          | 59.24                           | 38.04          |
| <b>Normalized yields</b> | 55.39                           | 44.61          | 60.90                           | 39.10          |

| Photostationary State between <i>cis</i> -Anethole and <i>trans</i> -Anethole |                |                |
|-------------------------------------------------------------------------------|----------------|----------------|
| min                                                                           | % <i>cis</i>   | % <i>trans</i> |
| <b>180</b>                                                                    | 58.15<br>(1.4) | 41.86<br>(1)   |

**Figure S11: Aminoarylation Product Stability Assay**

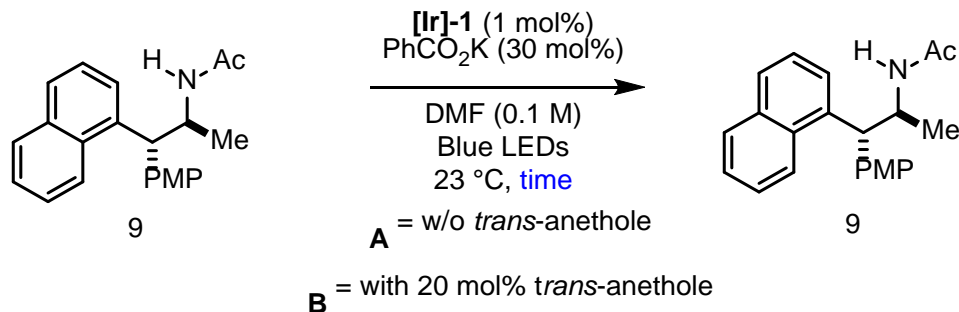

In order to validate the stability of the aminoarylation product and to be sure that it is not decomposing under the title reaction conditions over time, a stability assay analysis was performed.

To a flame dried 2-dram vial, equipped with a teflon coated oval shaped stir bar, was added the aminoarylation product (33.3 mg, 0.1 mmol), potassium benzoate (4.81 mg, 30 mol%), Ir(dF(CF<sub>3</sub>)ppy)<sub>2</sub>(5,5'-d(CF<sub>3</sub>)bpy)PF<sub>6</sub> (1 mg, 1 mol%), and in the case of trial **B** *trans*-anethole (2.97 μL, 0.02 mmol, 20 mol%). No *trans*-anethole was added for trial **A**. The vial contents were then dissolved in anhydrous DMF (1 mL, 0.1 M) followed by addition of trimethyl(phenyl)silane (5.7 μL, 0.033 mmol) as an internal standard. The reaction was sparged under argon for 15 min before the 1 mL solution volume was added to an argon sparged NMR tube. The tube were quickly capped and sealed with parafilm. Time zero (*t*<sub>0</sub>) <sup>1</sup>H-NMR measurements were taken prior to irradiation. Then, the NMR tubes were irradiated with 1 x blue H150 Kessil LED light (~2 cm) and cooled by one overhead fan. After the allotted time (i.e. 5, 10, 15, 20... min), the light was turned off and reaction solution analyzed by <sup>1</sup>H-NMR.

**Analysis:** The concentration of the aminoarylation product was plotted against time in minutes. As the plots below suggest, no noticeable degradation of the aminoarylation product occurs either in the presence or absence of *trans*-anethole. These results suggest the aminoarylation product is stable and does not readily undergo decomposition.

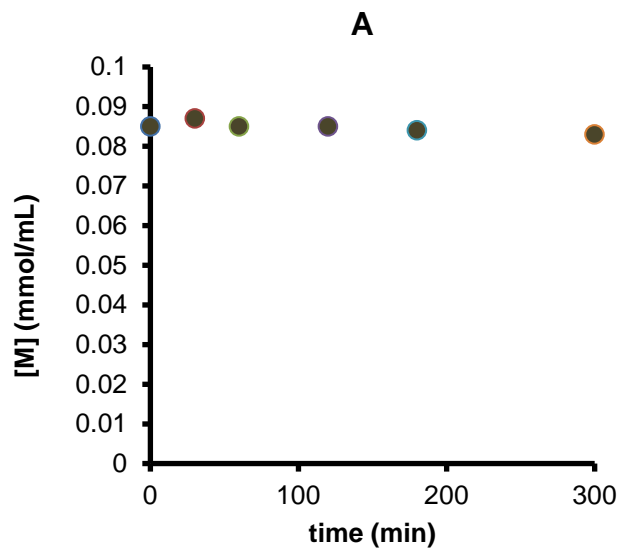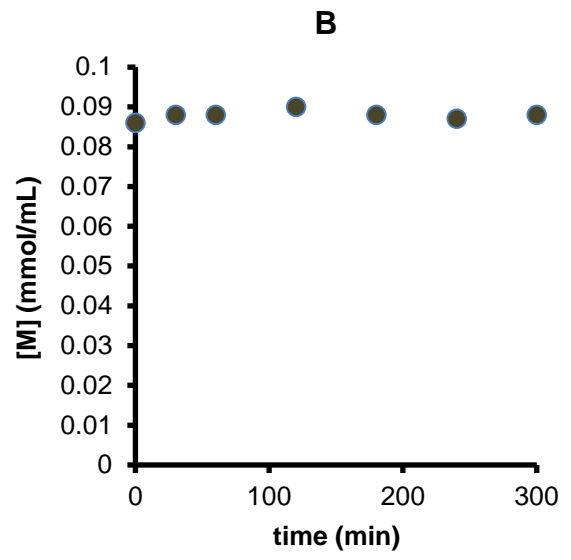



## Preparation of Reagents:

### Preparation of Ir(dF(CF<sub>3</sub>)ppy)<sub>2</sub>(5,5'-d(CF<sub>3</sub>)bpy)PF<sub>6</sub> (3)/[Ir]-1

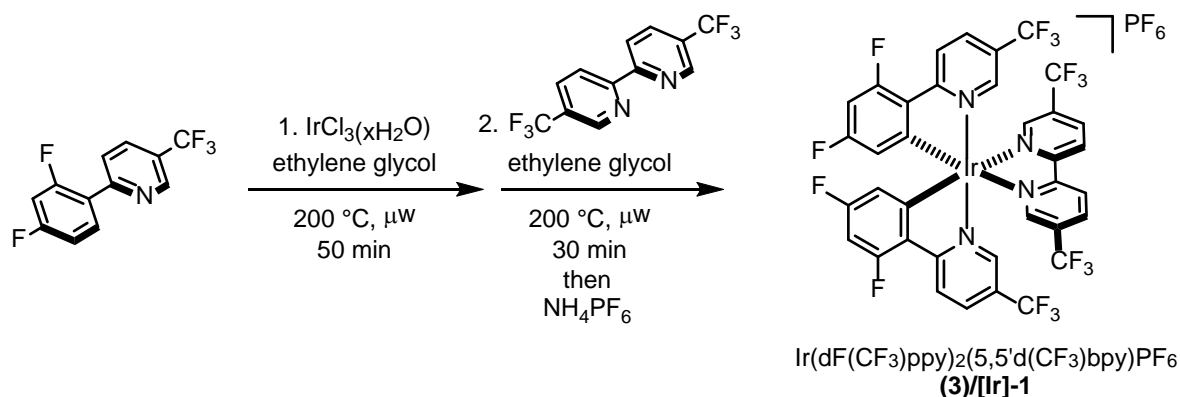

The following procedure has been adopted from a two-step, one-pot literature procedure from our laboratory disclosing the synthesis of heteroleptic-Ir(I) complexes through microwave irradiation (46).

To an oven dried 20 mL microwave vial was charged a magnetic stirring bar, IrCl<sub>3</sub>-xH<sub>2</sub>O (507 mg, 1.6 mmol, 1 equiv), and 2-(2,4-difluorophenyl)-5-(trifluoromethyl)pyridine (1.04 g, 4.0 mmol, 2.5 equiv). The vial contents were dissolved in ethylene glycol (15 mL) and then the microwave vial capped. Then the reaction was sonicated for 3 minutes to increase homogeneity (picture **A**). The reaction was heated in a microwave reactor at 200 °C for 50 min with a 5 min pre-stir period. After the reaction had cooled to room temperature (picture **B**), 5-(trifluoromethyl)-2-[5-(trifluoromethyl)-2-pyridyl]pyridine (617 mg, 2.1 mmol, 2 equiv) was added, the vial re-capped, and the reaction was heated to 200 °C for 30 min with a 5 min pre-stir period.

After the reaction had cooled to room temperature (picture **C**), the solution was dissolved in dH<sub>2</sub>O (50 mL) and extracted with CH<sub>2</sub>Cl<sub>2</sub> (3 x 20 mL). The organic layers were combined and concentrated down, followed by the addition of NH<sub>4</sub>PF<sub>6</sub> (10 g in ~50 mL dH<sub>2</sub>O). The whole was placed in the freezer overnight to allow for maximum crystal formation. The yellow/orange crystals were filtered and washed with cold Et<sub>2</sub>O. Re-crystallization was performed with pentane and acetone (insoluble in pentane) to provide the title complex as a free-flowing yellow powder (1.08 g, 59%).

<sup>1</sup>H and <sup>19</sup>F NMR characterization data is identical to that reported in the literature (17).

**<sup>1</sup>H NMR** (500 MHz, d<sub>6</sub>-Acetone) δ = 9.32 (d, *J* = 8.6 Hz, 1H), 8.83 (d, *J* = 8.5 Hz, 1H), 8.61 (d, *J* = 8.7 Hz, 1H), 8.56 (s, 1H), 8.40 (d, *J* = 8.9 Hz, 1H), 8.19 (s, 1H), 6.91 (t, *J* = 11.7 Hz, 1H), 5.98 (dd, *J* = 8.4, 2.2 Hz, 1H) ppm

**<sup>19</sup>F NMR** (471 MHz, d<sub>6</sub>-Acetone) δ = -62.66 (d, *J* = 107.9 Hz), -71.75 (d, *J*<sub>P-F</sub> = 707.4 Hz), -103.14 (dd, *J* = 20.1, 9.3 Hz), -106.81 (t, *J* = 12.2 Hz) ppm

| <b>A: After sonication</b>                                                                                                                                                                                                                   | <b>B: After step 1</b>                                                                                                                                                                                                                           | <b>C: After step 2</b>                                                                                                                                                                                                                             |
|----------------------------------------------------------------------------------------------------------------------------------------------------------------------------------------------------------------------------------------------|--------------------------------------------------------------------------------------------------------------------------------------------------------------------------------------------------------------------------------------------------|----------------------------------------------------------------------------------------------------------------------------------------------------------------------------------------------------------------------------------------------------|
| 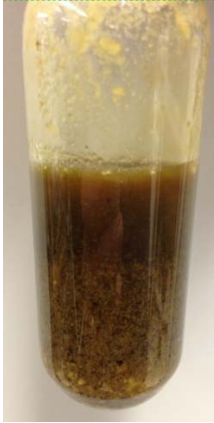 A glass vial containing a dark brown, opaque liquid with a thick, white, foamy head at the top. The bottom of the vial shows a dark, granular precipitate. |  A glass vial containing a bright yellow, translucent liquid with a thick, white, foamy head at the top. A dark, granular precipitate is visible at the bottom. |  A glass vial containing a bright orange, translucent liquid with a thick, white, foamy head at the top. A dark, granular precipitate is visible at the bottom. |

$^1\text{H}$  NMR (500 MHz,  $d_6$ -Acetone) for  $\text{Ir}(\text{dF}(\text{CF}_3)\text{ppy})_2(5,5'\text{-d}(\text{CF}_3)\text{bpy})\text{PF}_6$

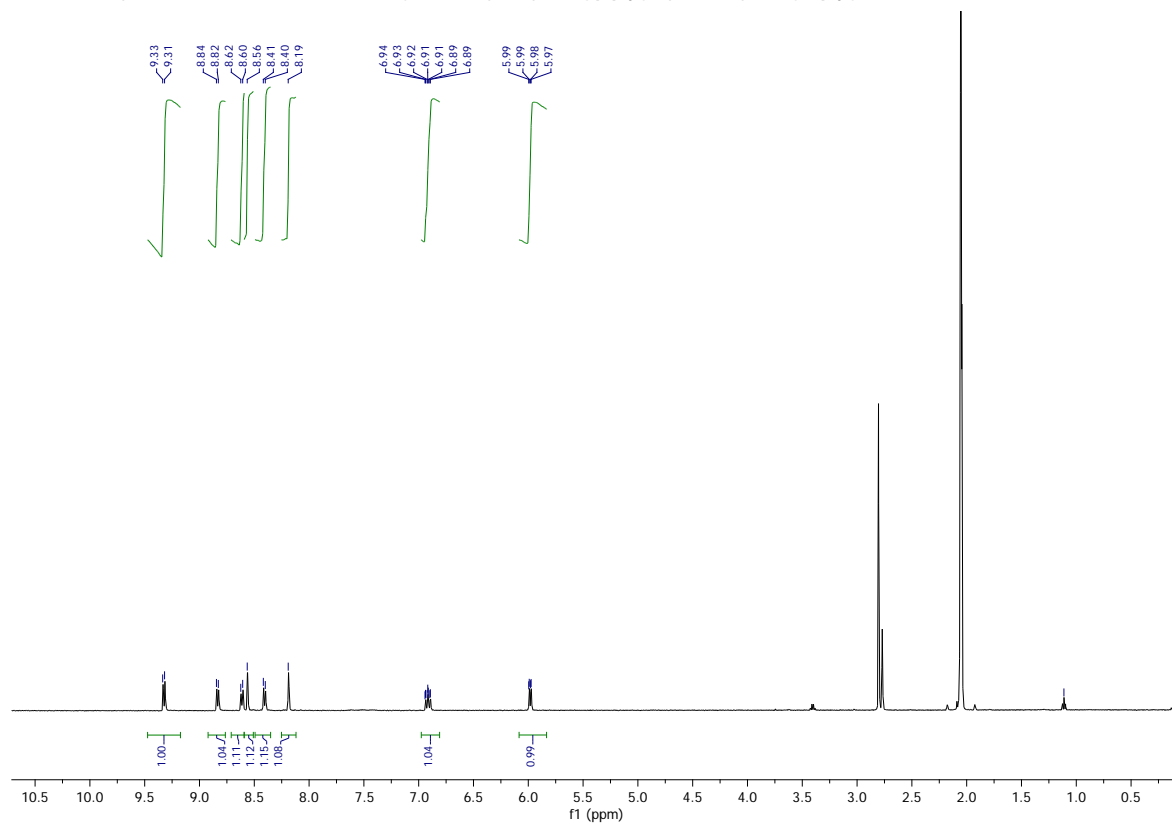

$^{19}\text{F}$  NMR (471 MHz,  $d_6$ -Acetone) for  $\text{Ir}(\text{dF}(\text{CF}_3)\text{ppy})_2(5,5'\text{-d}(\text{CF}_3)\text{bpy})\text{PF}_6$

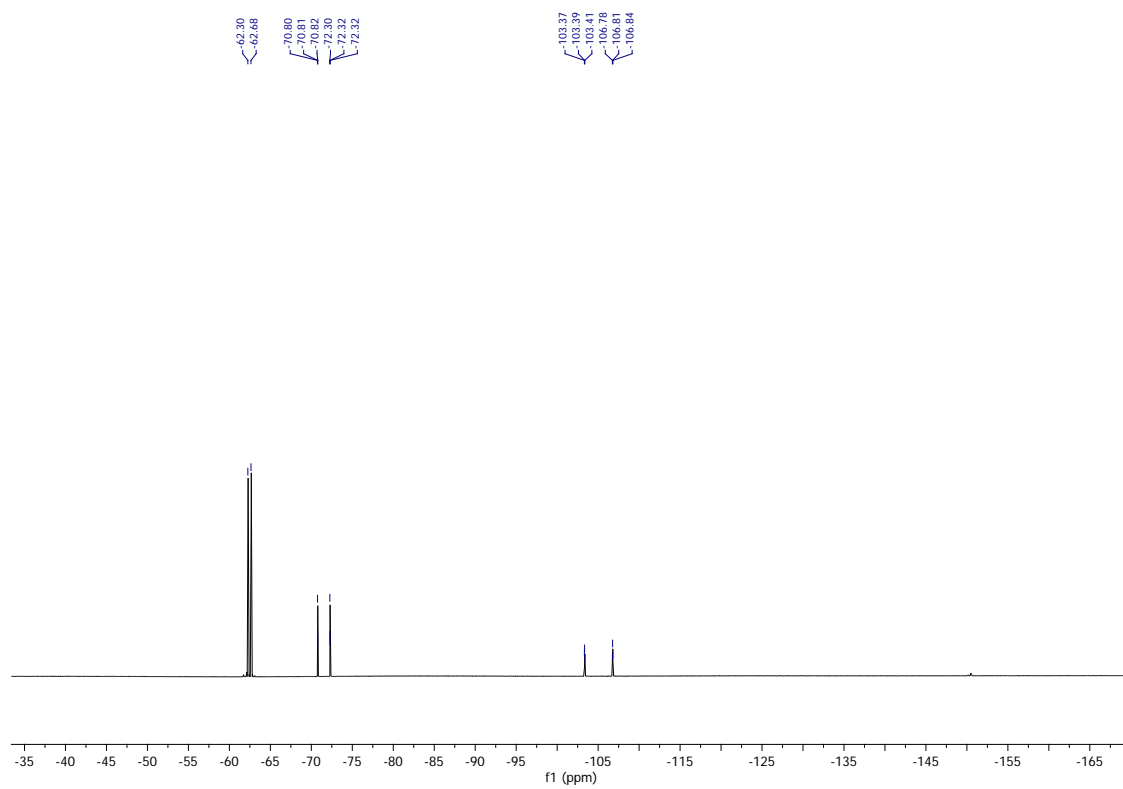

## Acyl Sulfonylamides:

### **N-(naphthalen-1-ylsulfonyl)acetamide (2)**

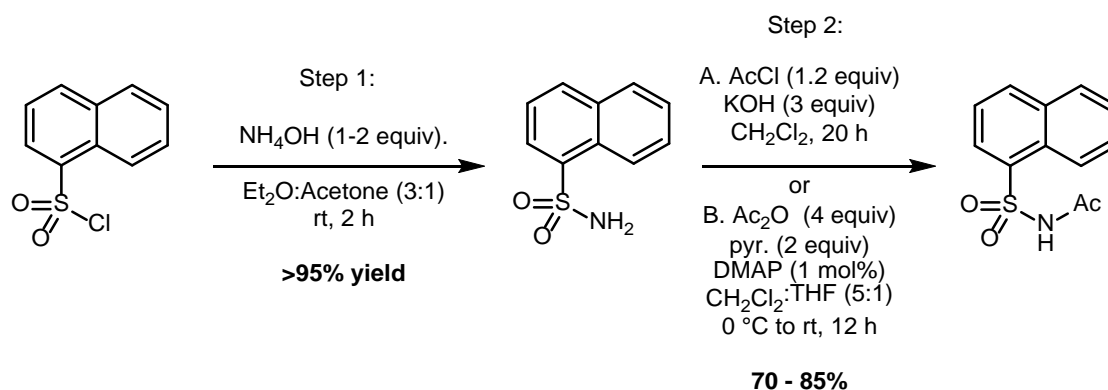

(Step 1): To a dry 250 mL round bottom flask equipped with a sizable oval shaped stir bar, a 3:1 mixture of Ether:Acetone was prepared (100 mL total). To this the solid naphthalene-1-sulfonyl chloride (10.0 g, 44.1 mmol), added into the flask. The solution is homogeneous at this point. Then by dropwise addition, saturated NH<sub>4</sub>OH ((5809  $\mu$ l) 44.1 mmol, 1 equiv) was added at 0 °C. The reaction was checked by TLC (4:6 EtOAc:Hexanes). If the reaction was not complete in 1 hour, an additional 1 equiv of NH<sub>4</sub>OH was added to ensure full conversion.

The reaction was then neutralized to a pH of 6-7. Caution should be taken to not inhale the off gassing excess ammonia from the solution, and this will process faster if the reaction is under a continuous flush of nitrogen gas. Dilute the reaction in an equal volume of water and extract 2x with an equal amount of ethyl acetate. Combine the organic portions and dry over sodium sulfate, with a final concentration *in vacuo* to reveal a white powder.

(Step 2A): To a dry 250 mL round bottom flask equipped with a sizeable oval shaped stir bar, KOH (4426 mg, 78.9 mmol – crushed fine powder) and naphthalene-1-sulfonamide (5.45 g, 26.3 mmol) were added. The flask was evacuated and backfilled with nitrogen 3 times, after which the contents were diluted in dichloromethane solvent (50 mL). After stirring for a few minutes, acetyl chloride (2244  $\mu$ L, 31.6 mmol) was added dropwise at room temperature. During this addition, the reaction very noticeably goes heterogeneous, then homogeneous and then back to heterogeneous. After 2 hours this reaction is complete, but is stable if left under nitrogen for up to 24 hours. At this point the reaction was diluted with 100 mL of water and acidified past neutrality. These contents were then transferred to a 500 mL separatory funnel and the aqueous layer was extracted 2x times with 75 mL of CH<sub>2</sub>Cl<sub>2</sub>. The CH<sub>2</sub>Cl<sub>2</sub> extracts were combined, and concentrated, and the product was recrystallized in methanol to yield dense white crystals.

Alternatively, the product can be separated from the starting material by first combining the CH<sub>2</sub>Cl<sub>2</sub> extraction and concentrating *in vacuo* to take back up in a

minimal amount of EtOAc (60 mL). This was then extracted 5x times with 60 mL of 5 % NaHCO<sub>3</sub> aq solution. These combined aqueous extracts were then acidified using 4 M HCl beyond neutrality (product becomes insoluble in solution. Finally, the desired product can be extracted from the acidic aqueous layer using EtOAc or CH<sub>2</sub>Cl<sub>2</sub>. Combination and drying over Na<sub>2</sub>SO<sub>4</sub> and concentration *in vacuo* yields the desired product. The product can be further purified by recrystallization in MeOH. Non-recrystallized material is lighter in density, and more difficult to handle.

(*Step 2B*): To a flame dried 100 mL round bottom flask equipped with a magnetic stir bar was added naphthalene-1-sulfonamide (1 g, 4.83 mmol), DMAP (6 mg, 1 mol%), CH<sub>2</sub>Cl<sub>2</sub> (35 mL), and THF (6 mL). The reaction mixture at this point appears mostly heterogeneous. Then the reaction was cooled to 0 °C and via syringe was added pyridine (777 μL, 9.65 mmol, 2 equiv) followed by acetic anhydride (1.82 mL, 19.3 mmol, 4 equiv). The whole slowly became more homogeneous over a few minutes. The reaction was slowly allowed to warm to rt while stirring overnight (12 h). Upon completion of the reaction as judged by TLC analysis (40% EtOAc in Hex), the reaction was diluted in 20 mL dH<sub>2</sub>O, layers separated, and the aqueous layer washed with 20 mL CH<sub>2</sub>Cl<sub>2</sub>. The organic layers were combined and rinsed with 1 N HCl (2 x 20 mL), brine, dried over sodium sulfate, filtered and concentrated *in vacuo* to provide white, compact crystals. The product may be further purified via flash column chromatography (0-40% EtOAc in Hex elution gradient).

**<sup>1</sup>H NMR** (700 MHz, CDCl<sub>3</sub>): δ = 8.68 (bs, 1H), 8.59 (d, *J* = 8.5 Hz, 1H), 8.51 (d, *J* = 7.2 Hz, 1H), 8.16 (d, *J* = 8.1 Hz, 1H), 7.99 (d, *J* = 8.1 Hz, 1H), 7.70 (t, *J* = 7.6 Hz, 1H), 7.63 (dd, *J* = 12.5, 7.3 Hz, 2H), 2.03 (s, 3H) ppm

**<sup>13</sup>C NMR** (176 MHz, CDCl<sub>3</sub>): δ = 168.1, 135.8, 134.2, 133.0, 132.1, 129.4, 128.9, 128.0, 127.1, 124.2, 123.6, 23.4 ppm

**R<sub>f</sub>** (4:6 – EtOAc:Hex) = 0.3

**IR** (*neat*): 3246, 1730, 1441, 1410, 1372, 1328, 1215, 1127, 760, 734 cm<sup>-1</sup>

**HRMS** (ESI+) *m/z* calculated for C<sub>12</sub>H<sub>11</sub>NO<sub>3</sub>S [M+H]<sup>+</sup> 250.0532, found 250.0529

**MP**: 184–187 °C

<sup>1</sup>H NMR (700 MHz, CDCl<sub>3</sub>) for 2

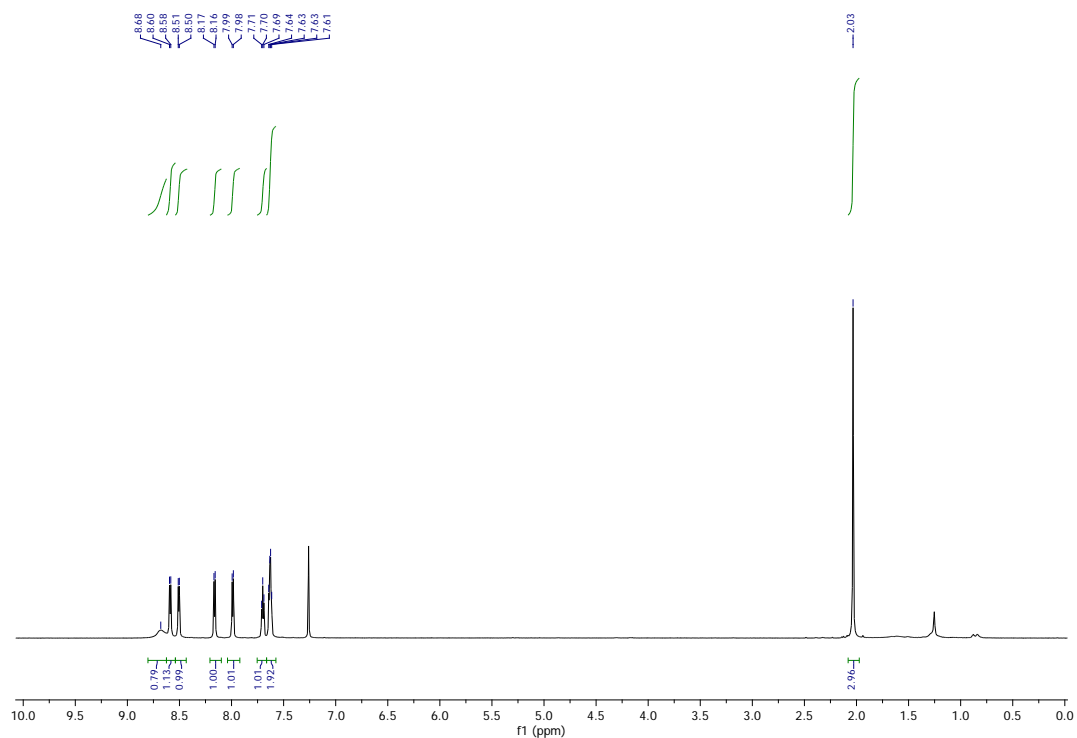

<sup>13</sup>C NMR (176 MHz, CDCl<sub>3</sub>) for 2

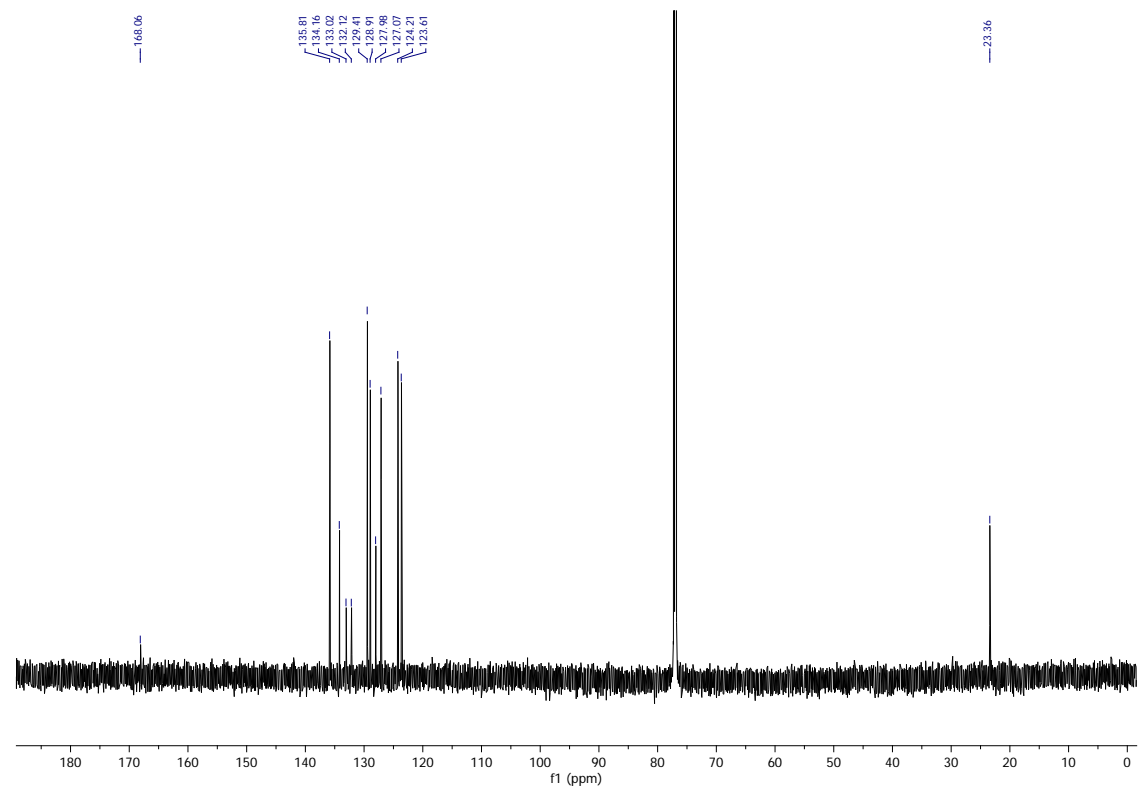

**ethyl (naphthalen-1-ylsulfonyl)carbamate (S1)**

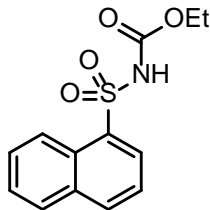

To a 100 mL round bottom flask charged with a magnetic stir bar was added naphthalene-1-sulfonamide (1 g, 4.83 mmol), DMAP (29.5 mg, 0.24 mmol), CH<sub>2</sub>Cl<sub>2</sub> (30 mL), and ethyl chloroformate (0.59 mL, 6.27 mmol). The whole was cooled to 0 °C then triethylamine (0.74 mL, 5.31 mmol) was added dropwise via syringe. The reaction slowly went from a white, heterogeneous mixture to a clear colorless, homogenous solution. The reaction was gradually warmed to rt and monitored by TLC (50% EtOAc in Hex). After 2 h, the reaction was concentrated under reduced pressure to give a light yellow oil. This crude mixture was diluted with EtOAc (30 mL) then washed 3 x with 1 N HCl (10 mL). The organic layer was washed with brine, dried over sodium sulfate, and filtered to give a white solid. Purification by flash column chromatography (10 to 40% EtOAc in Hex elution gradient) provided the title substrate as a compact white solid (782 mg, 59%).

**<sup>1</sup>H NMR** (700 MHz, CDCl<sub>3</sub>): δ = 8.60 (d, *J* = 8.6 Hz, 1H), 8.49 (d, *J* = 7.4 Hz, 1H), 8.15 (d, *J* = 8.2 Hz, 1H), 7.98 (d, *J* = 8.1 Hz, 1H), 7.80 (s, 1H), 7.70 (t, *J* = 7.7 Hz, 1H), 7.62 (dt, *J* = 12.1, 7.5 Hz, 2H), 4.04 (q, *J* = 7.1 Hz, 2H), 1.11 (t, *J* = 7.1 Hz, 3H) ppm

**<sup>13</sup>C NMR** (176 MHz, CDCl<sub>3</sub>): δ = 150.2, 135.7, 134.1, 132.8, 132.4, 129.3, 128.8, 128.0, 127.0, 124.1, 123.9, 63.1, 13.9 ppm

**R<sub>f</sub>** (5:5 – EtOAc:Hex) = 0.5

**IR** (*neat*): 3081, 1712, 1507, 1476, 1352, 1309, 1167, 1139, 917, 802, 766 cm<sup>-1</sup>

**HRMS** (ESI+) *m/z* calculated for C<sub>13</sub>H<sub>13</sub>NO<sub>4</sub>S [M+H]<sup>+</sup> 280.00638, found 280.0634.

**MP**: 137–140 °C

# <sup>1</sup>H NMR (700 MHz, CDCl<sub>3</sub>) for S1

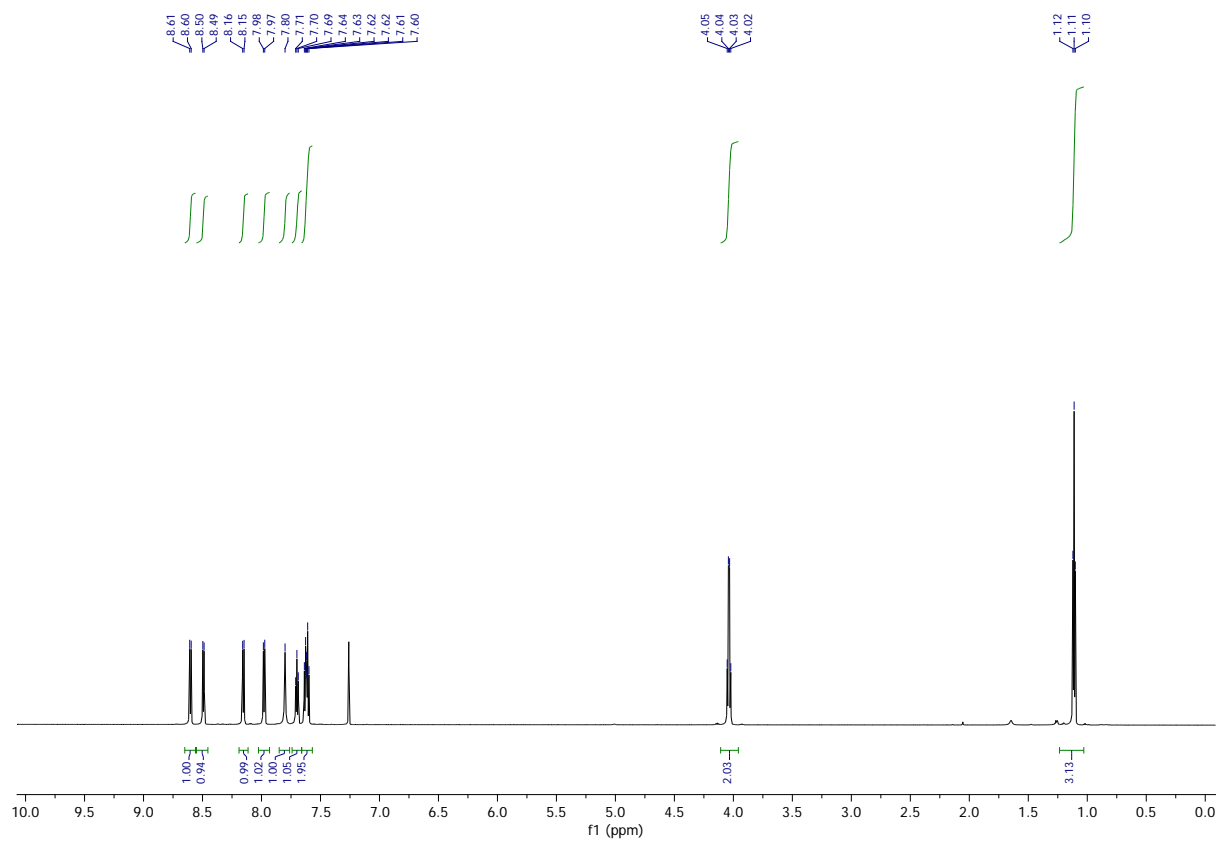

# <sup>13</sup>C NMR (176 MHz, CDCl<sub>3</sub>) for S1

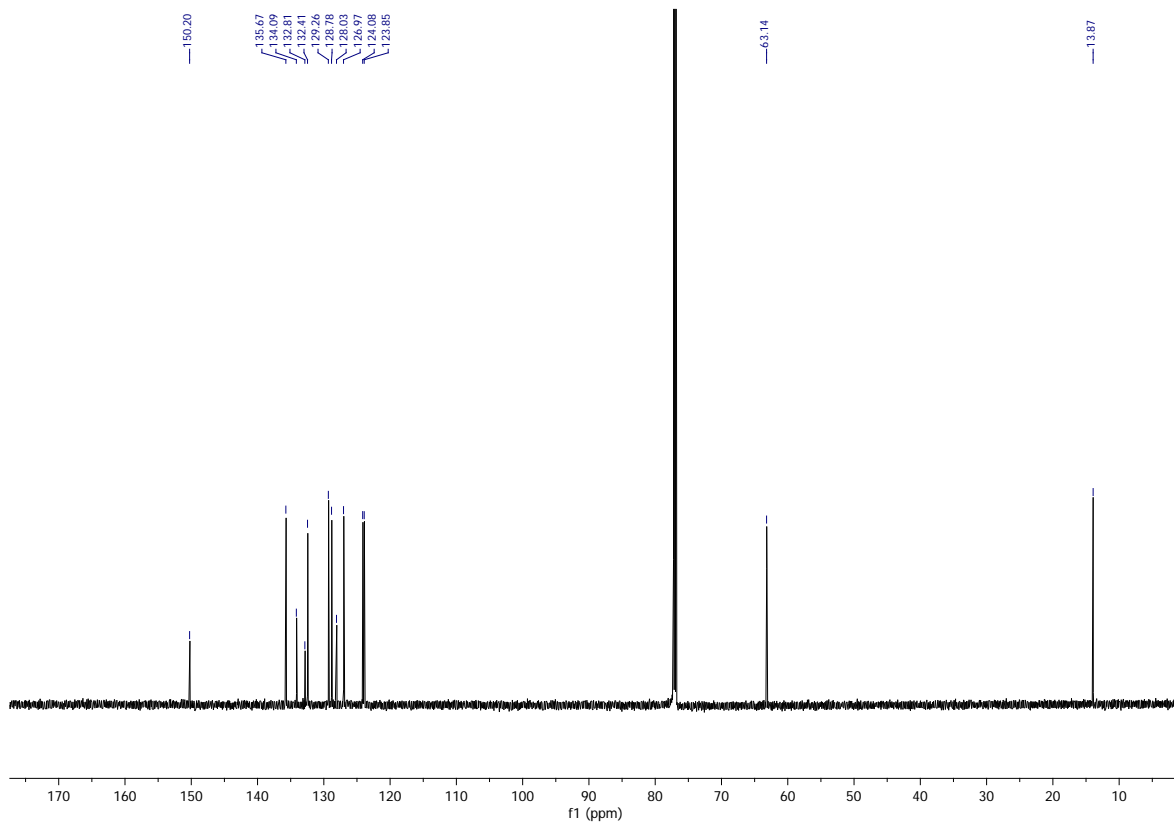



**tert-butyl (naphthalen-1-ylsulfonyl)carbamate (S2)**

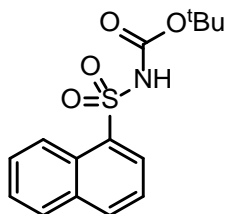

To a 50 mL round bottom flask charged with a magnetic stir bar was added naphthalene-1-sulfonamide (1 g, 4.83 mmol), DMAP (58.9 mg, 0.483 mmol), CH<sub>2</sub>Cl<sub>2</sub> (30 mL), and BOC anhydride (1.22 mL, 5.31 mmol). The whole was cooled to 0 °C then triethylamine (0.74 mL, 5.31 mmol) was added dropwise via syringe. The reaction slowly went from a cloudy white color to clear. The whole was slowly warmed to rt and monitored by TLC (50% EtOAc in Hex). After 2 h, the reaction was concentrated under reduced pressure to give a light yellow oil. This crude mixture was diluted with EtOAc (30 mL) then washed 3 x with 1 N HCl (10 mL). The organic layer was washed with brine, dried over sodium sulfate, and filtered to give a white solid. Purification by flash column chromatography (10 to 40% EtOAc in Hex elution gradient) provided the title substrate as a compact white solid (1.02 g, 69%).

**<sup>1</sup>H NMR** (700 MHz, CDCl<sub>3</sub>): δ = 8.58 (d, *J* = 8.6 Hz, 1H), 8.45 (d, *J* = 7.2 Hz, 1H), 8.15 (d, *J* = 8.2 Hz, 1H), 7.97 (d, *J* = 8.1 Hz, 1H), 7.69 (t, *J* = 7.5 Hz, 1H), 7.63 – 7.59 (m, 3H), 1.27 (s, 9H) ppm

**<sup>13</sup>C NMR** (176 MHz, CDCl<sub>3</sub>): δ = 149.0, 135.4, 134.1, 133.2, 132.1, 129.2, 128.7, 128.0, 126.9, 124.0, 123.9, 84.3, 27.7 ppm

**R<sub>f</sub>** (5:5 – EtOAc:Hex) = 0.5

**IR** (*neat*): 3073, 2982, 1701, 1354, 1332, 1134, 804, 777 cm<sup>-1</sup>

**HRMS** (ESI+) *m/z* calculated for C<sub>15</sub>H<sub>17</sub>NO<sub>4</sub>S [M+H]<sup>+</sup> 308.0951, found 308.0947.

**MP:** 134–138 °C

<sup>1</sup>H NMR (700 MHz, CDCl<sub>3</sub>) for S2

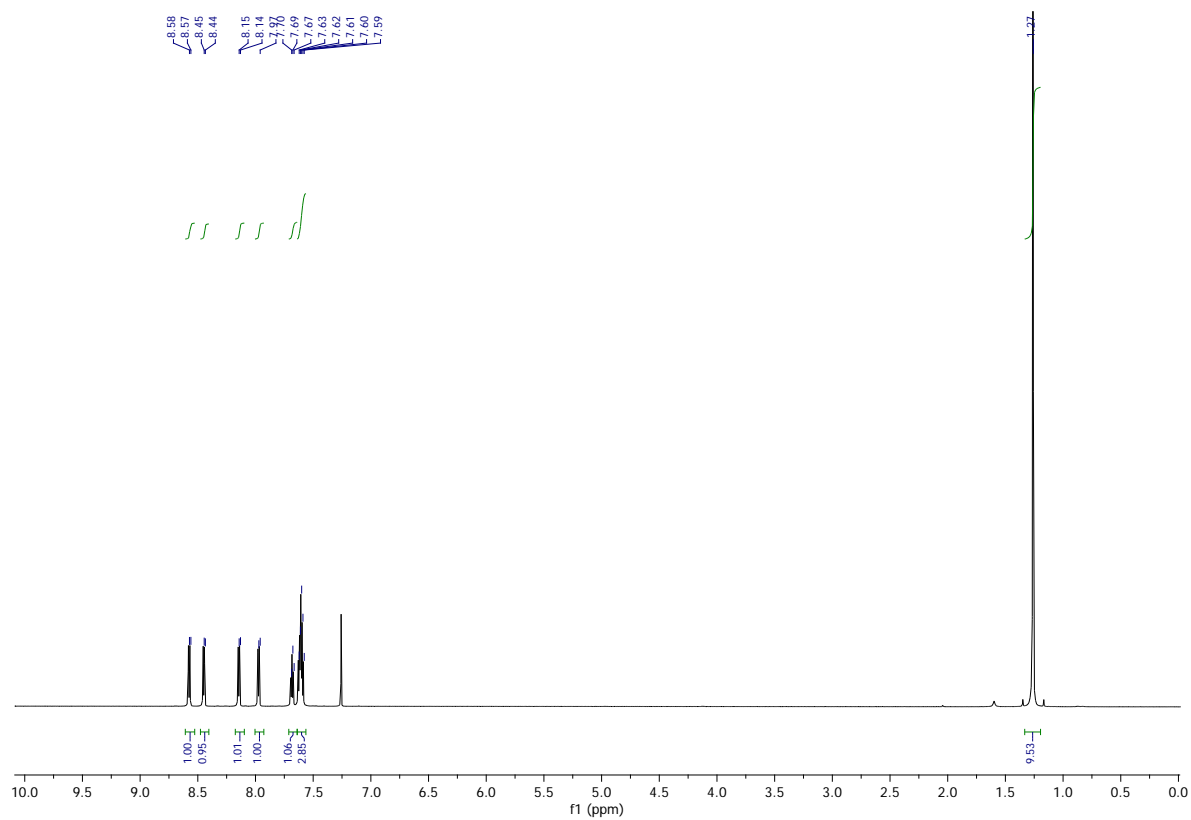

<sup>13</sup>C NMR (176 MHz, CDCl<sub>3</sub>) for S2

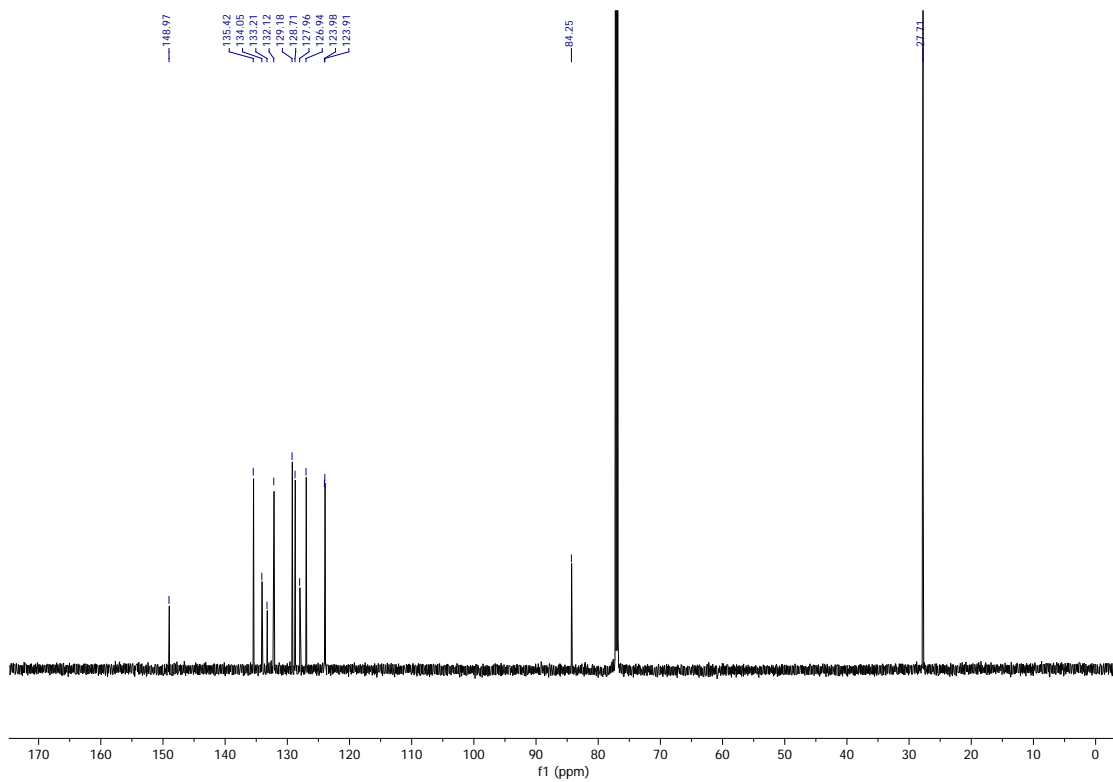

### 2,2,2-trifluoro-N-(naphthalen-1-ylsulfonyl)acetamide (S3)

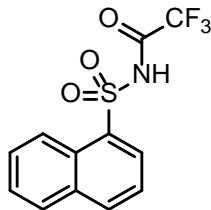

To a 100 mL round bottom flask charged with a magnetic stir bar was added naphthalene-1-sulfonamide (1 g, 4.83 mmol), DMAP (58.9 mg, 0.483 mmol), CH<sub>2</sub>Cl<sub>2</sub> (40 mL), and TFAA (0.783 mL, 5.31 mmol). The whole was cooled to 0 °C then triethylamine (0.74 mL, 5.31 mmol) was added dropwise via syringe. The reaction slowly went from a cloudy white color to clear. The whole was slowly warmed to rt and monitored by TLC (50% EtOAc in Hex). After 4 h, the reaction was concentrated under reduced pressure to give a light yellow oil. This crude mixture was diluted with EtOAc (30 mL) then washed 3 x with 1 N HCl (10 mL). The organic layer was washed with brine, dried over sodium sulfate, and filtered to give a white solid. Purification by flash column chromatography (10 to 40% EtOAc in Hex elution gradient) provided the title substrate as a compact white solid (1.28 g, 88%).

**<sup>1</sup>H NMR** (400 MHz, DMSO-d<sub>6</sub>): δ = 11.06 (bs, 1H), 8.68 (d, *J* = 8.0 Hz, 1H), 8.14 – 8.01 (m, 2H), 7.98 (d, *J* = 7.4 Hz, 1H), 7.72 – 7.40 (m, 3H) ppm

**<sup>13</sup>C NMR** (176 MHz, DMSO-d<sub>6</sub>): δ = 159.9 (q, *J* = 32.9 Hz), 139.9, 133.6, 131.7, 128.3, 128.3, 127.4, 126.6, 126.1, 124.3, 117.6 (q, *J* = 291.4 Hz)

**<sup>19</sup>F NMR** (377 MHz, DMSO-d<sub>6</sub>) = δ -74.1 ppm

**R<sub>f</sub>** (5:5 – EtOAc:Hex) = 0.3

**IR** (*neat*): 3209, 1762, 1508, 1452, 1362, 1201, 1108, 988, 765 cm<sup>-1</sup>

**HRMS** (ESI+) *m/z* calculated for C<sub>12</sub>H<sub>8</sub>F<sub>3</sub>NO<sub>3</sub>S [M+H]<sup>+</sup> 326.0069, found 326.0066.

**MP**: 165-168 °C

<sup>1</sup>H NMR (400 MHz, DMSO-d<sub>6</sub>) for S3

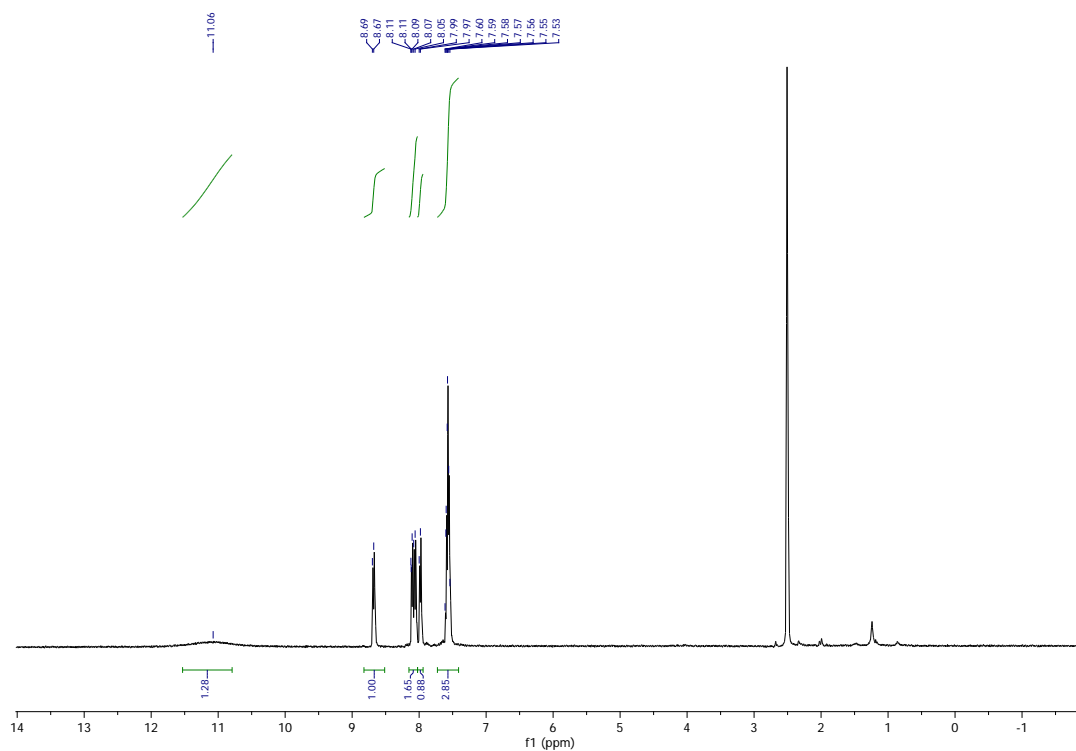

<sup>13</sup>C NMR (176 MHz, DMSO-d<sub>6</sub>) for S3

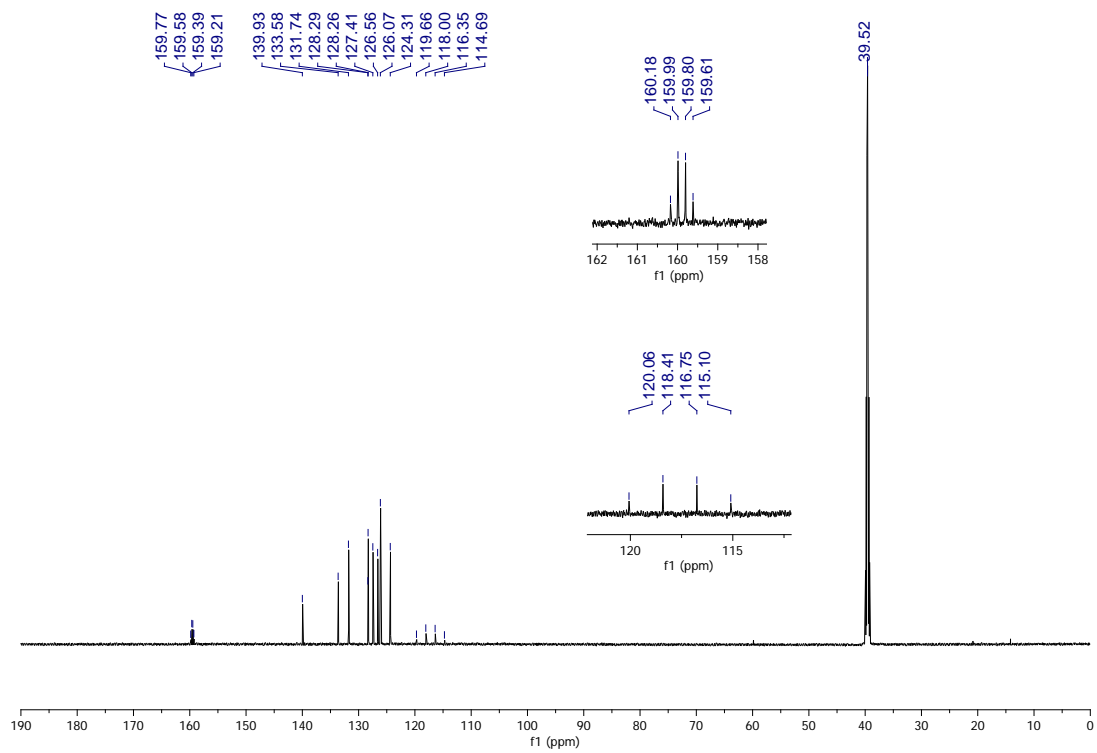

$^{19}\text{F}$  NMR (377 MHz,  $\text{CDCl}_3$ ) for S3

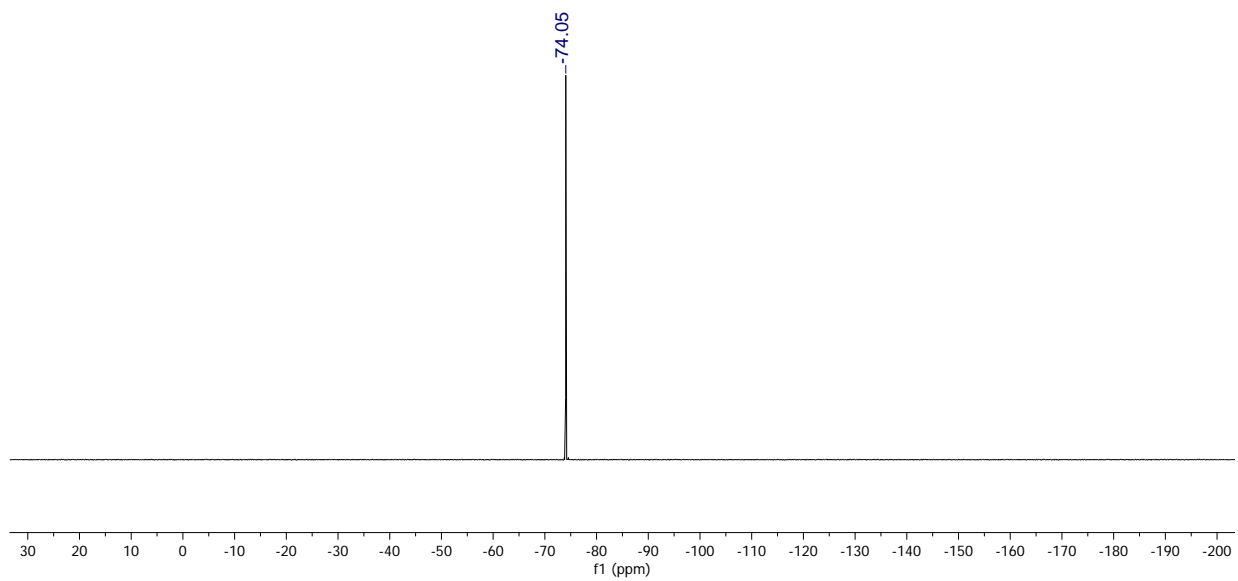

### **N-(thiophen-2-ylsulfonyl)acetamide (S4)**

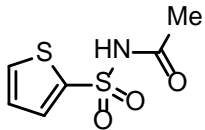

To a flame dried 250 mL round bottom flask charged with a magnetic stir bar was added thiophene-2-sulfonamide (3 g, 18.4 mmol), DMAP (22.5 mg, 0.184 mmol), CH<sub>2</sub>Cl<sub>2</sub> (50 mL), and THF (10 mL). The reaction appears mostly heterogeneous. Then the reaction was cooled to 0 °C then via syringe was added pyridine (4.44 mL, 55.1 mmol) followed by acetic anhydride (6.95 mL, 73.5 mmol). The reaction was allowed to warm to rt and monitored by TLC (50% EtOAc in Hex). After 3 h, the reaction was concentrated under reduced pressure to give a light yellow oil. This crude mixture was diluted with EtOAc (30 mL) then washed 3 x with 1 N HCl (10 mL). The organic layer was washed with brine, dried over sodium sulfate, and filtered to give a white solid. Purification by flash column chromatography (10 to 50% EtOAc in Hex elution gradient) provided the title substrate as a compact white solid (2.57 g, 68%).

**<sup>1</sup>H NMR** (700 MHz, CDCl<sub>3</sub>): δ = 8.71 (s, 1H), 7.90 (dd, *J* = 3.8, 1.2 Hz, 1H), 7.71 (dd, *J* = 5.0, 1.2 Hz, 1H), 7.14 (dd, *J* = 4.9, 3.9 Hz, 1H), 2.13 (s, 3H) ppm

**<sup>13</sup>C NMR** (176 MHz, CDCl<sub>3</sub>): δ = 168.1, 138.6, 135.2, 134.2, 127.5, 23.6 ppm

**R<sub>f</sub>** (5:5 – EtOAc:Hex) = 0.4

**IR** (*neat*): 3105, 1688, 1446, 1421, 1368, 1351, 1017, 999, 728 cm<sup>-1</sup>

**HRMS** (EI) *m/z* calculated for C<sub>6</sub>H<sub>7</sub>NO<sub>3</sub>S<sub>2</sub> [M<sup>+</sup>] 204.9867, found 204.9871.

**MP**: 84–87 °C

<sup>1</sup>H NMR (700 MHz, CDCl<sub>3</sub>) for S4

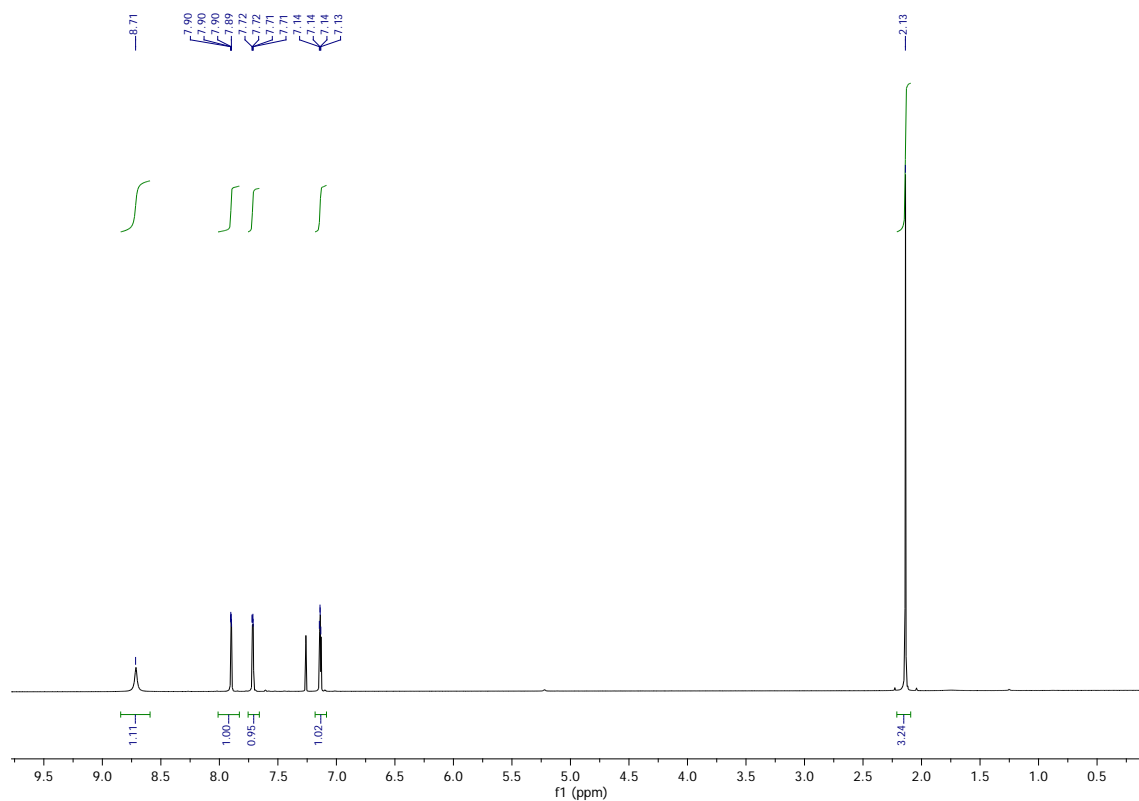

<sup>13</sup>C NMR (176 MHz, CDCl<sub>3</sub>) for S4

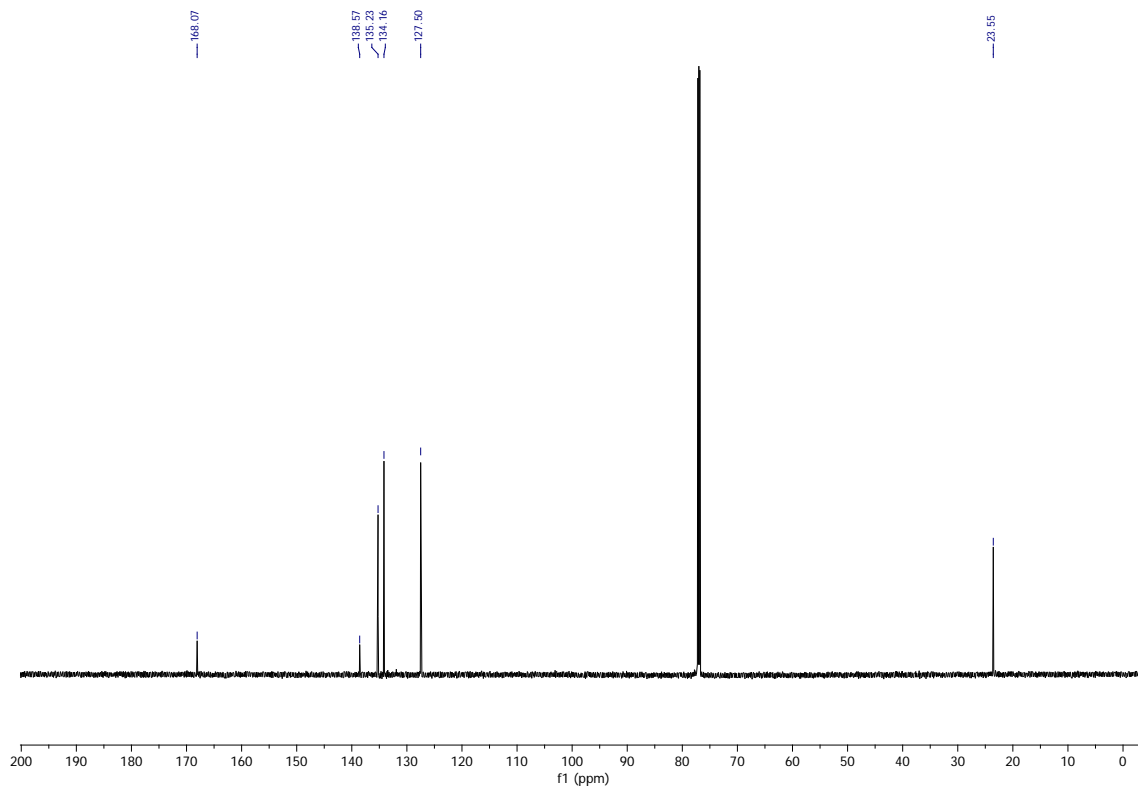

**methyl 3-(*N*-acetylsulfamoyl)thiophene-2-carboxylate (S5)**

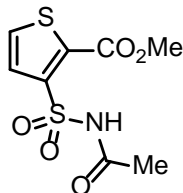

To a flame dried 100 mL round bottom flask charged with a magnetic stir bar was added methyl 3-sulfamoylthiophene-2-carboxylate (500 mg, 2.26 mmol), DMAP (2.76 mg, 0.0226 mmol), CH<sub>2</sub>Cl<sub>2</sub> (35.0 mL), and THF (5.00 mL). The reaction appears mostly heterogeneous. The whole was cooled to 0 °C then via syringe was added pyridine (0.546 mL, 6.78 mmol) and acetic anhydride (0.854 mL, 9.04 mmol). The reaction was allowed to warm to rt and monitored by TLC (50% EtOAc in Hex). After 12 h, the reaction was concentrated under reduced pressure to give a light yellow oil. This crude mixture was diluted with EtOAc (30 mL) then washed 3 x with 1 N HCl (10 mL). The organic layer was washed with brine, dried over sodium sulfate, and filtered to give a white solid. Purification by flash column chromatography (10 to 50% EtOAc in Hex elution gradient) provided the title substrate as a compact white solid (512 mg, 86%).

**<sup>1</sup>H NMR** (700 MHz, CDCl<sub>3</sub>): δ = 8.92 (s, 1H), 7.72 (d, *J* = 5.2 Hz, 1H), 7.58 (d, *J* = 5.2 Hz, 1H), 3.95 (s, 3H), 2.15 (s, 3H) ppm

**<sup>13</sup>C NMR** (176 MHz, CDCl<sub>3</sub>): δ = 168.5, 160.3, 142.9, 132.6, 131.5, 130.4, 53.3, 23.6 ppm

**R<sub>f</sub>** (5:5 – EtOAc:Hex) = 0.2

**IR** (*neat*): 3131, 1719, 1701, 1435, 1358, 1265, 1173, 1144, 898, 772 cm<sup>-1</sup>

**HRMS** (ESI+) *m/z* calculated for C<sub>8</sub>H<sub>9</sub>NO<sub>5</sub>S<sub>2</sub>Na [M+Na]<sup>+</sup> 285.9814, found 285.9818.

**MP**: 178–181 °C



<sup>1</sup>H NMR (700 MHz, CDCl<sub>3</sub>) for S5

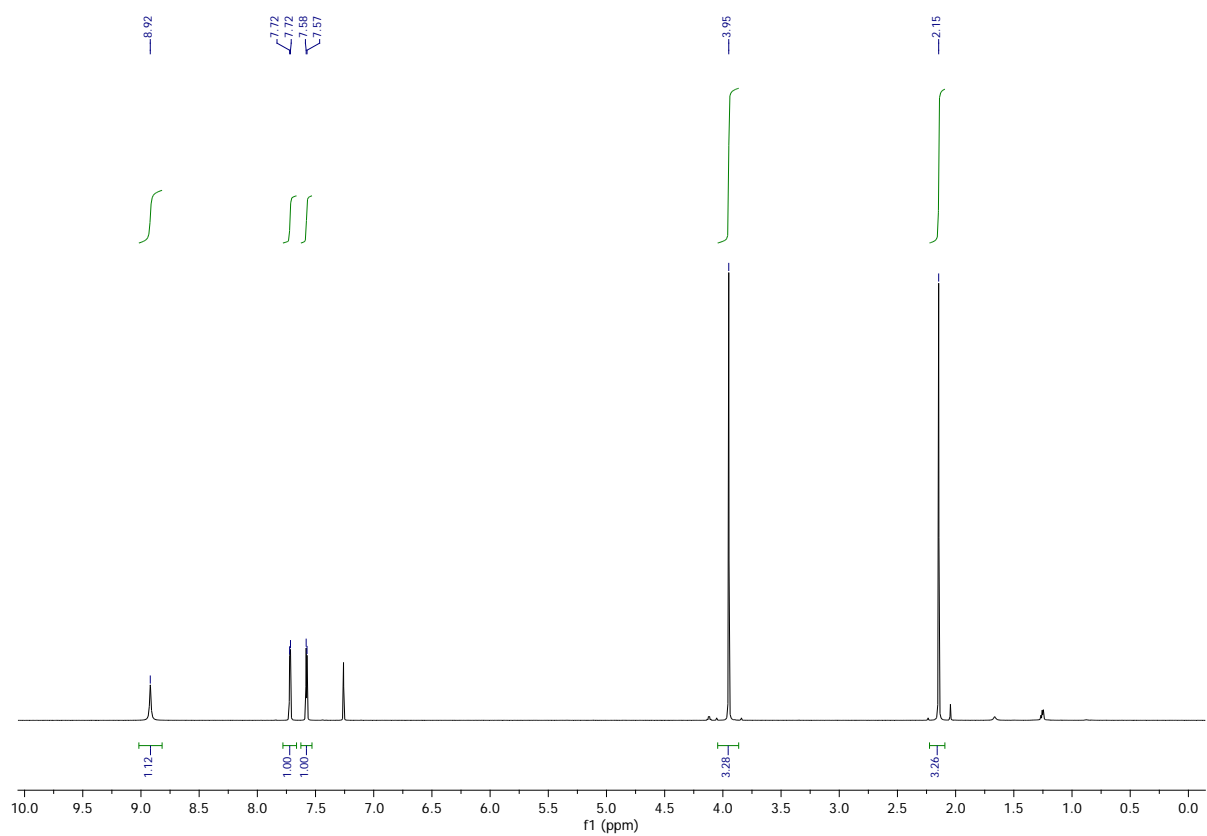

<sup>13</sup>C NMR (176 MHz, CDCl<sub>3</sub>) for S5

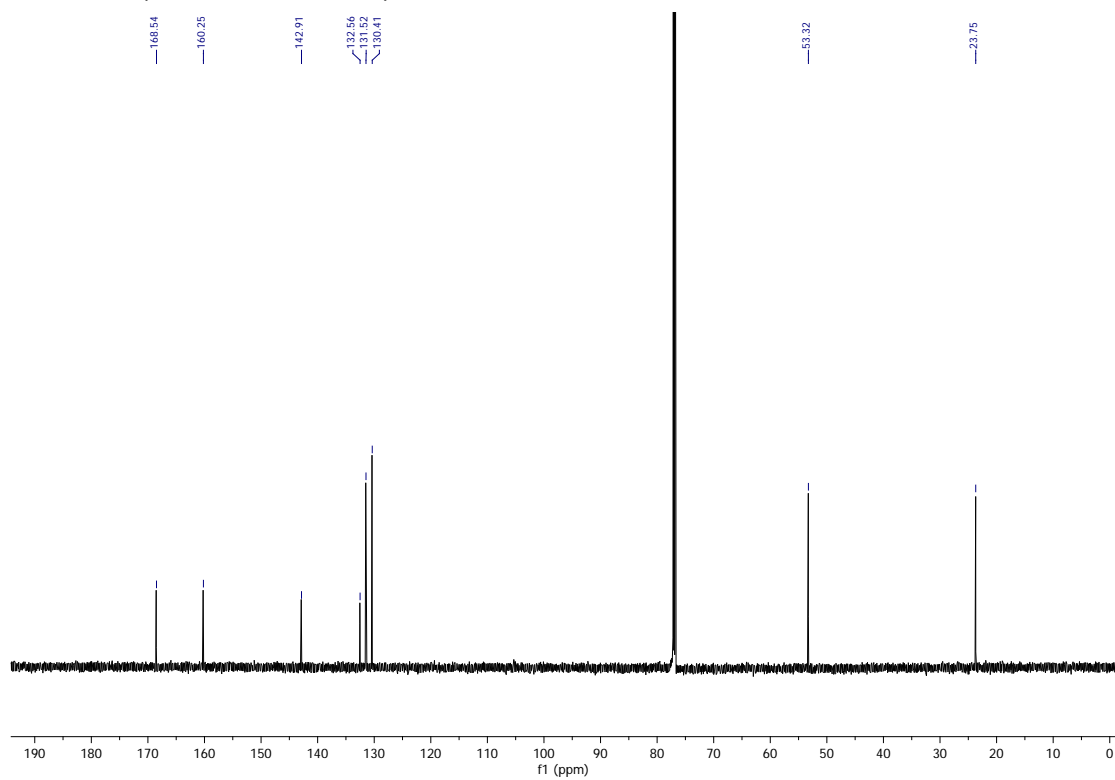

### **N-(quinolin-8-ylsulfonyl)acetamide (S6)**

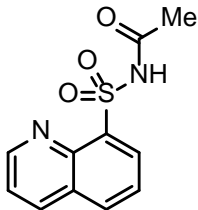

To a flame dried 250 mL round bottom flask charged with a magnetic stir bar was added quinoline-8-sulfonamide (1000 mg, 4.80 mmol), DMAP (5.87 mg, 0.0480 mmol), CH<sub>2</sub>Cl<sub>2</sub> (35.0 mL), and THF (5.00 mL). The reaction appears mostly heterogeneous. The whole was cooled to 0 °C then via syringe was added pyridine (0.387 mL, 4.80 mmol) followed by acetic anhydride (1.82 mL, 19.2 mmol). The reaction was allowed to warm to rt and monitored by TLC (50% EtOAc in Hex). After 12 h, the reaction was diluted in 100 mL dH<sub>2</sub>O. The white crystalline solid were filtered off and washed with cold acetone to provide the title substrate as a compact white solid (1.03 g, 86%).

**<sup>1</sup>H NMR** (700 MHz, DMSO-d<sub>3</sub>): δ = 12.32 (s, 1H), 9.10 (m, 1H), 8.57 (d, *J* = 8.1 Hz, 1H), 8.46 (d, *J* = 8.1 Hz, 1H), 8.35 (d, *J* = 8.1 Hz, 1H), 7.80 (t, *J* = 7.7 Hz, 1H), 7.72 (dd, *J* = 8.2, 4.1 Hz, 1H), 1.88 (s, 3H) ppm

**<sup>13</sup>C NMR** (176 MHz, DMSO-d<sub>3</sub>): δ = 169.0, 151.5, 142.8, 137.1, 135.2, 134.7, 133.1, 128.5, 125.6, 122.6, 23.1 ppm

**R<sub>f</sub>** (5:5 – EtOAc:Hex) = 0.3

**IR** (*neat*): 3003, 2818, 1713, 1499, 1457, 1330, 1166, 1139, 995, 973 cm<sup>-1</sup>

**HRMS** (ESI+) *m/z* calculated for C<sub>11</sub>H<sub>10</sub>N<sub>2</sub>O<sub>3</sub>S [M+H]<sup>+</sup> 251.0485, found 251.0484.

**MP**: 240–245 °C

<sup>1</sup>H NMR (700 MHz, DMSO-d<sub>6</sub>) for S6

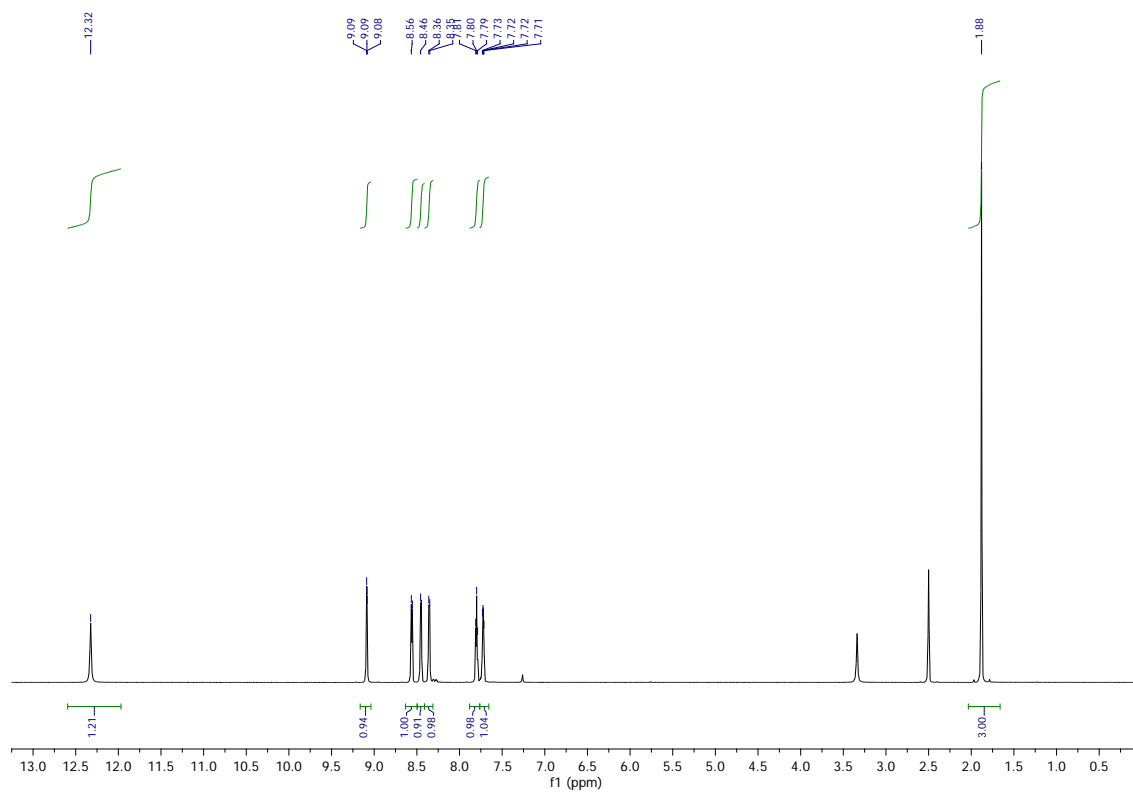

<sup>13</sup>C NMR (176 MHz, DMSO-d<sub>3</sub>) for S6

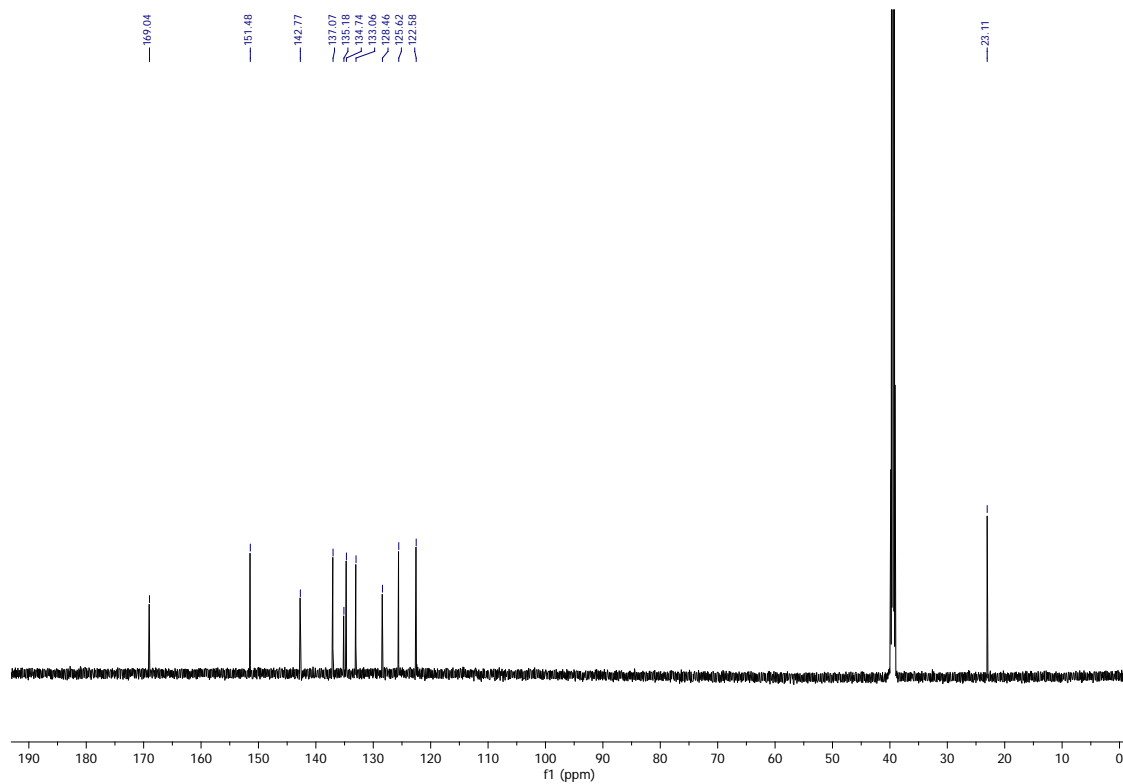

### **N-(naphthalen-2-ylsulfonyl)acetamide (S7)**

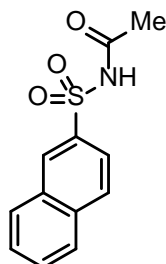

To a flame dried 100 mL round bottom flask equipped with a magnetic stir bar was added naphthalene-1-sulfonamide (1 g, 4.83 mmol), DMAP (6 mg, 1 mol%), CH<sub>2</sub>Cl<sub>2</sub> (35 mL), and THF (6 mL). The reaction mixture at this point appears mostly heterogeneous. Then the reaction was cooled to 0 °C and via syringe was added pyridine (777 uL, 9.65 mmol, 2 equiv) followed by acetic anhydride (1.82 mL, 19.3 mmol, 4 equiv). The whole slowly became more homogeneous over a few minutes. The reaction was slowly allowed to warm to rt while stirring overnight (12 h). Upon completion of the reaction as judged by TLC analysis (40% EtOAc in Hex), the reaction was diluted in 20 mL dH<sub>2</sub>O, layers separated and the aqueous layer was extracted with 20 mL CH<sub>2</sub>Cl<sub>2</sub>. The organic layers were combined and rinsed with 1 N HCl (2 x 20 mL), brine, dried over sodium sulfate, filtered and concentrated *in vacuo* to provide a white powder. The material may be further purified via flash column chromatography (0 to 40% EtOAc in Hex elution gradient) to provide the title substrate as a compact white solid (848 mg, 78%).

**<sup>1</sup>H NMR** (700 MHz, CDCl<sub>3</sub>): δ = 8.67 (bm, 2H), 8.02 (d, *J* = 8.2 Hz, 1H), 7.99 (s, 2H), 7.93 (d, *J* = 8.2 Hz, 1H), 7.68 (t, *J* = 7.5 Hz, 1H), 7.63 (t, *J* = 7.5 Hz, 1H), 2.09 (s, 3H) ppm

**<sup>13</sup>C NMR** (176 MHz, CDCl<sub>3</sub>): δ = 168.0, 135.5, 135.1, 131.9, 130.5, 129.6, 129.5, 129.4, 127.9, 127.8, 122.5, 23.5 ppm

**R<sub>f</sub>** (5:5 – EtOAc:Hex) = 0.3

**IR** (*neat*): 3274, 1719, 1436, 1412, 1328, 1150, 1126, 994, 877, 747 cm<sup>-1</sup>

**HRMS** (ESI+) *m/z* calculated for C<sub>12</sub>H<sub>11</sub>NO<sub>3</sub>S [M+H]<sup>+</sup> 272.0352, found 272.0353.

**MP**: 137–139 °C

<sup>1</sup>H NMR (700 MHz, CDCl<sub>3</sub>) for S7

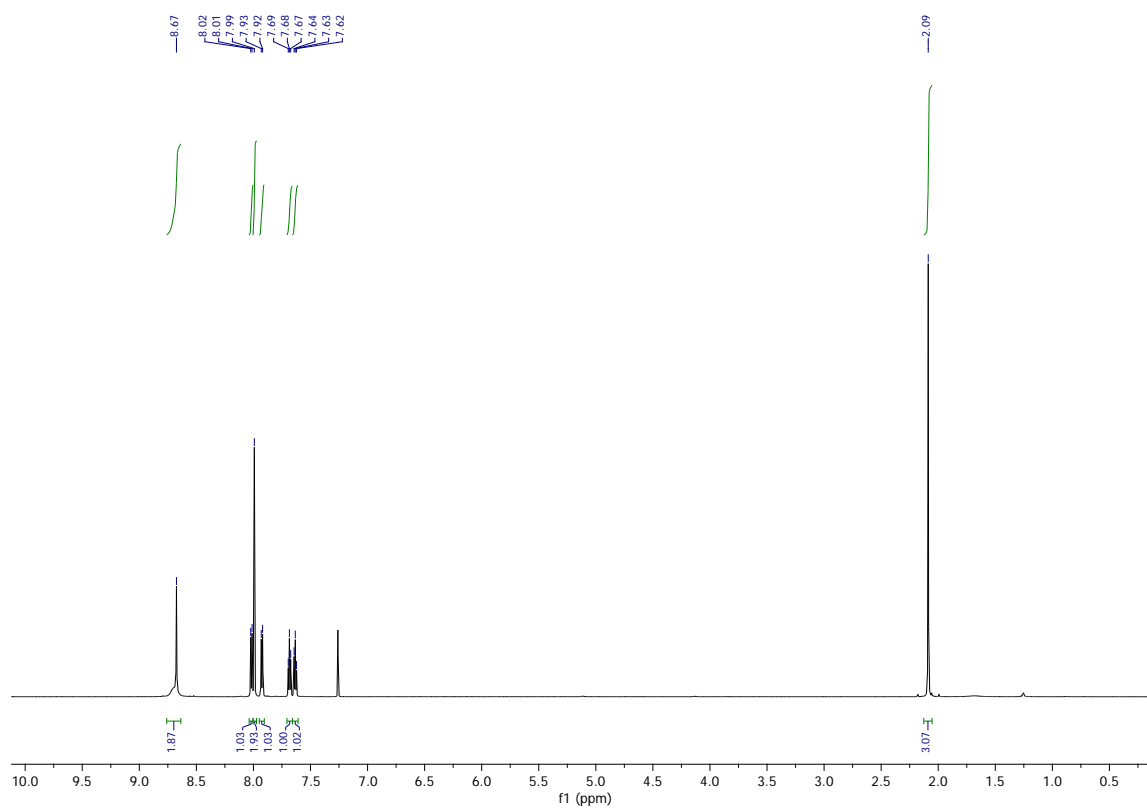

<sup>13</sup>C NMR (176 MHz, CDCl<sub>3</sub>) for S7

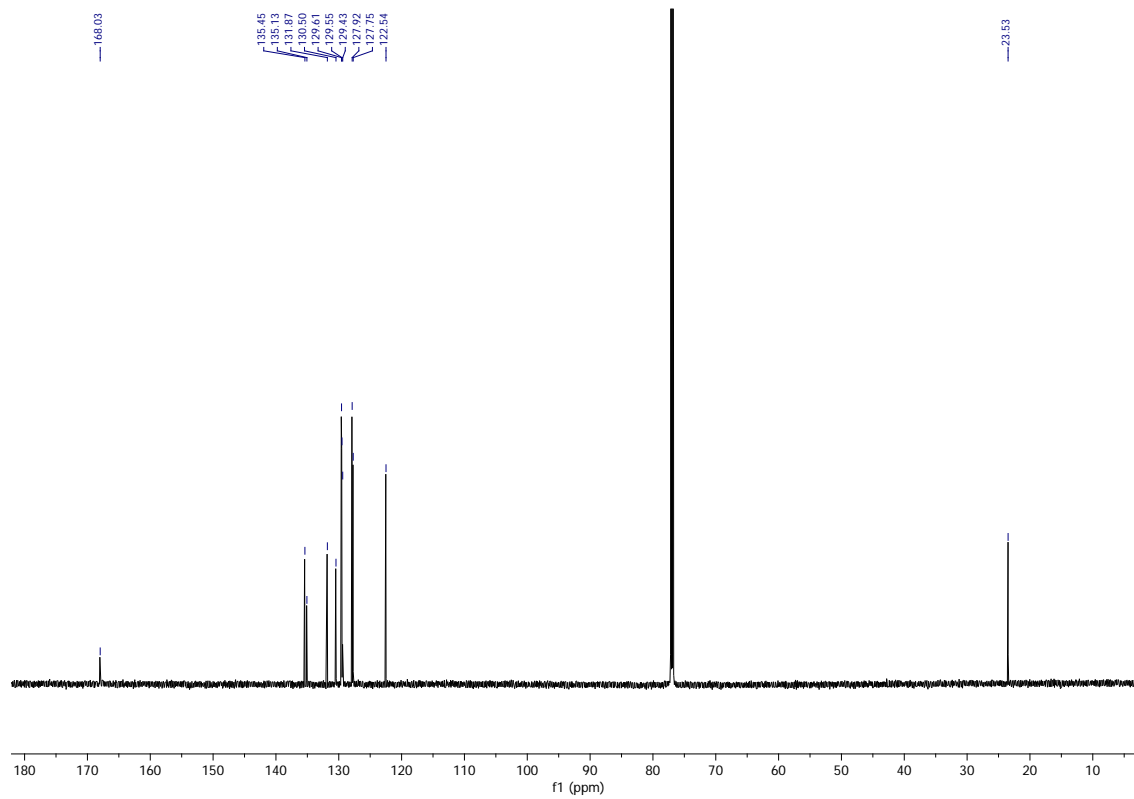

**methyl 5-(*N*-acetylsulfamoyl)furan-2-carboxylate (S8)**

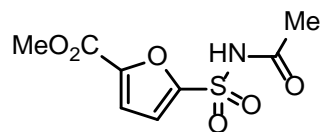

To a flame dried 100 mL round bottom flask equipped with a magnetic stir bar was added methyl 5-sulfamoylfuran-2-carboxylate (184 mg, 0.897 mmol), DMAP (1.10 mg, 0.00897 mmol), CH<sub>2</sub>Cl<sub>2</sub> (20.0 mL), and THF (5.00 mL). The reaction mixture at this point appears mostly heterogeneous. Then the reaction was cooled to 0 °C and via syringe was added pyridine (0.217 mL, 2.69 mmol) followed by acetic anhydride (0.339 mL, 3.59 mmol). The whole slowly became more homogeneous over a few minutes. The reaction was slowly allowed to warm to rt while stirring for 3 h. Upon completion of the reaction as judged by TLC analysis (50% EtOAc in Hex), the reaction was concentrated under reduced pressure to give a light yellow oil. This crude mixture was diluted with CH<sub>2</sub>Cl<sub>2</sub> (15 mL) then washed 3 x with 1 N HCl (10 mL). The organic layer was washed with brine, dried over sodium sulfate, and filtered to give a white solid. Purification by flash column chromatography (10 to 50% EtOAc in Hex elution gradient) provided the title substrate as a compact white solid (172 mg, 78%).

**<sup>1</sup>H NMR** (700 MHz, CDCl<sub>3</sub>): δ = 8.89 (s, 1H), 7.38 (d, *J* = 3.6 Hz, 1H), 7.24 (d, *J* = 3.6 Hz, 1H), 3.93 (s, 3H), 2.17 (s, 3H) ppm

**<sup>13</sup>C NMR** (176 MHz, CDCl<sub>3</sub>): δ = 168.0, 158.0, 148.9, 147.3, 120.3, 118.0, 52.8, 23.6 ppm

**R<sub>f</sub>** (5:5 – EtOAc:Hex) = 0.2

**IR** (*neat*): 3303, 3159, 1732, 1574, 1431, 1355, 1040, 917 cm<sup>-1</sup>

**HRMS** (ESI+) *m/z* calculated for C<sub>8</sub>H<sub>9</sub>NO<sub>6</sub>S [M+H]<sup>+</sup> 265.0489, found 265.0488.

**MP:** 133–137 °C

<sup>1</sup>H NMR (700 MHz, CDCl<sub>3</sub>) for S8

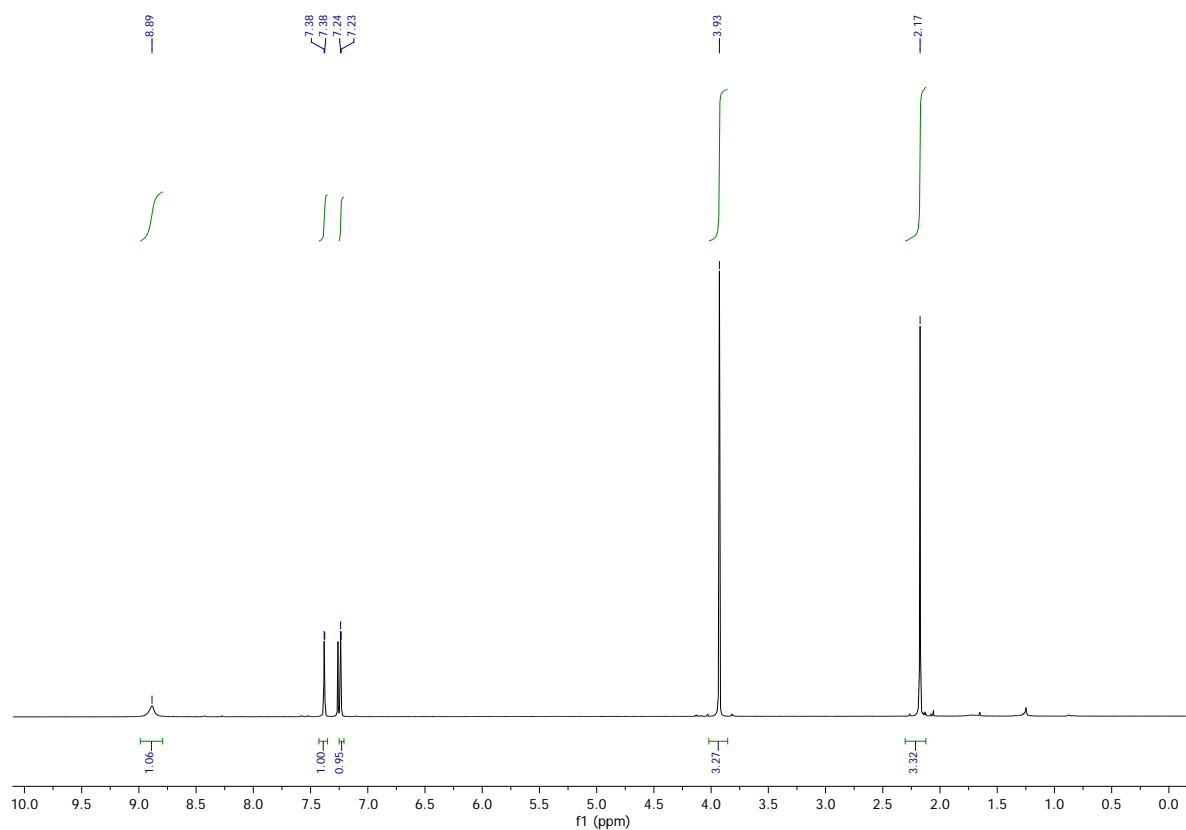

<sup>13</sup>C NMR (176 MHz, CDCl<sub>3</sub>) for S8

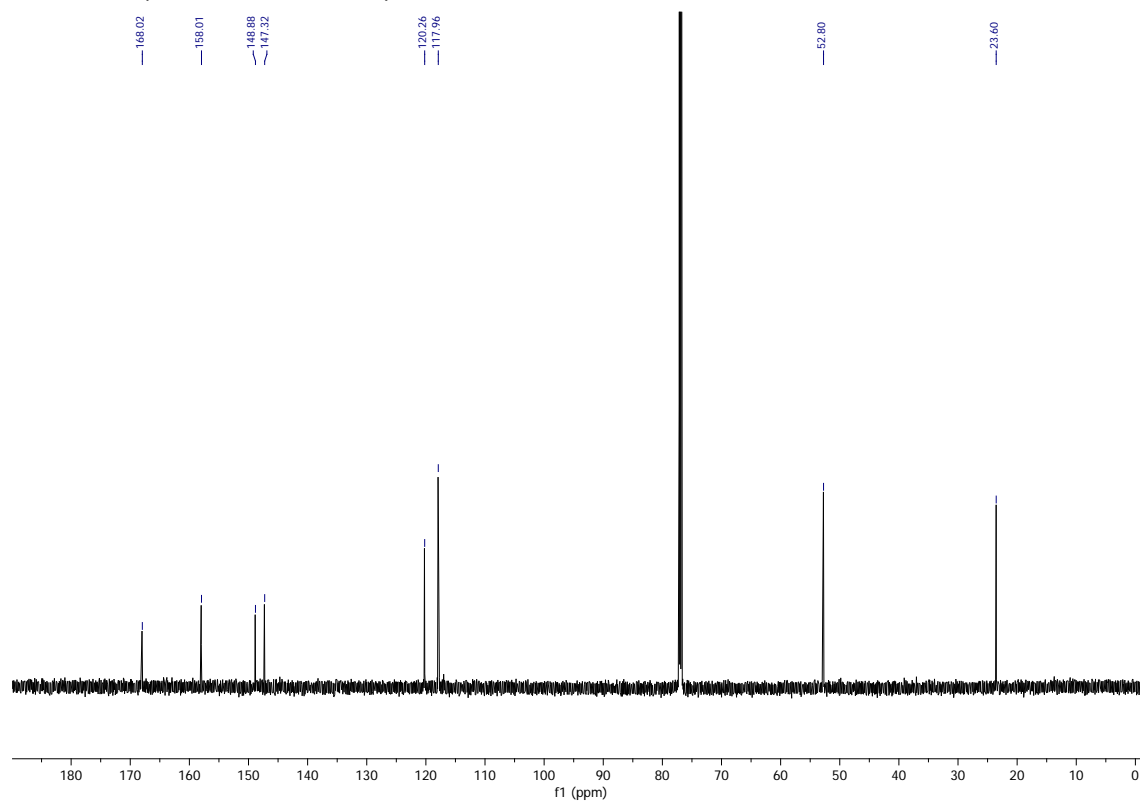

### **N-(thiophen-3-ylsulfonyl)acetamide (S9)**

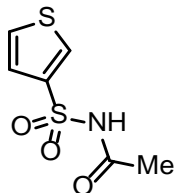

To a flame dried 100 mL round bottom flask equipped with a magnetic stir bar was added thiophene-3-sulfonamide (1000 mg, 6.13 mmol), DMAP (7.48 mg, 0.0613 mmol), CH<sub>2</sub>Cl<sub>2</sub> (35.0 mL), and THF (5.0 mL). The reaction mixture at this point appears mostly heterogeneous. Then the reaction was cooled to 0 °C and via syringe was added pyridine (1.48 mL, 18.4 mmol) followed by acetic anhydride (2.32 mL, 24.5 mmol). The whole slowly became more homogeneous over a few minutes. The reaction was slowly allowed to warm to rt while stirring for 12 h. Upon completion of the reaction as judged by TLC analysis (50% EtOAc in Hex), the reaction was concentrated under reduced pressure to give a light yellow oil. This crude mixture was diluted with CH<sub>2</sub>Cl<sub>2</sub> (25 mL) then washed 3 x with 1 N HCl (20 mL). The organic layer was washed with brine, dried over sodium sulfate, and filtered to give a white solid. Purification by flash column chromatography (10 to 50% EtOAc in Hex elution gradient) provided the title substrate as a compact white solid (1.12 g, 89%).

**<sup>1</sup>H NMR** (700 MHz, CDCl<sub>3</sub>): δ = 8.78 (s, 1H), 8.32 – 8.20 (m, 1H), 7.60 – 7.48 (m, 1H), 7.44 (dd, *J* = 5.1, 3.1 Hz, 1H), 2.11 (s, 3H) ppm

**<sup>13</sup>C NMR** (176 MHz, CDCl<sub>3</sub>): δ = 168.3, 138.0, 133.7, 127.8, 126.1, 23.6 ppm

**R<sub>f</sub>** (5:5 – EtOAc:Hex) = 0.3

**IR** (*neat*): 3070, 2867, 1691, 1460, 1417, 1346, 1235, 1157, 788 cm<sup>-1</sup>

**HRMS** (ESI+) *m/z* calculated for C<sub>6</sub>H<sub>7</sub>NO<sub>3</sub>S<sub>2</sub>Na [M+Na]<sup>+</sup> 227.9760, found 227.9757.

**MP**: 98–101 °C



<sup>1</sup>H NMR (700 MHz, CDCl<sub>3</sub>) for S9

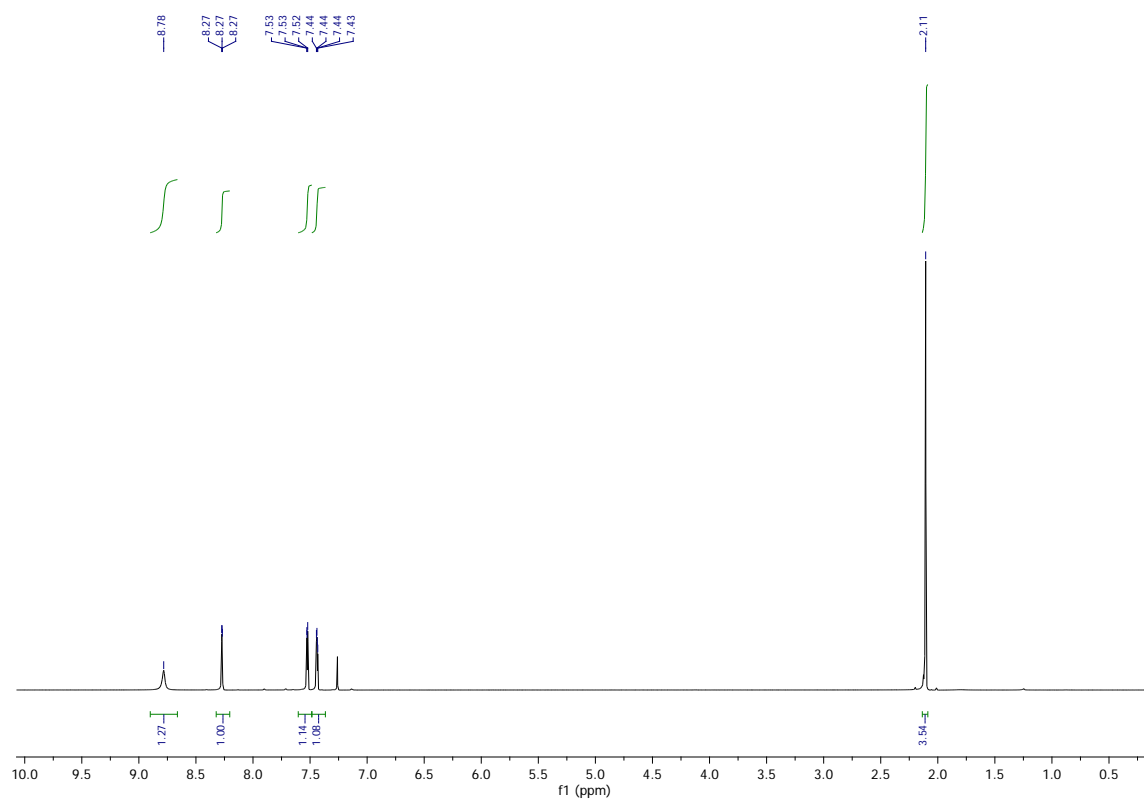

<sup>13</sup>C NMR (176 MHz, CDCl<sub>3</sub>) for S9

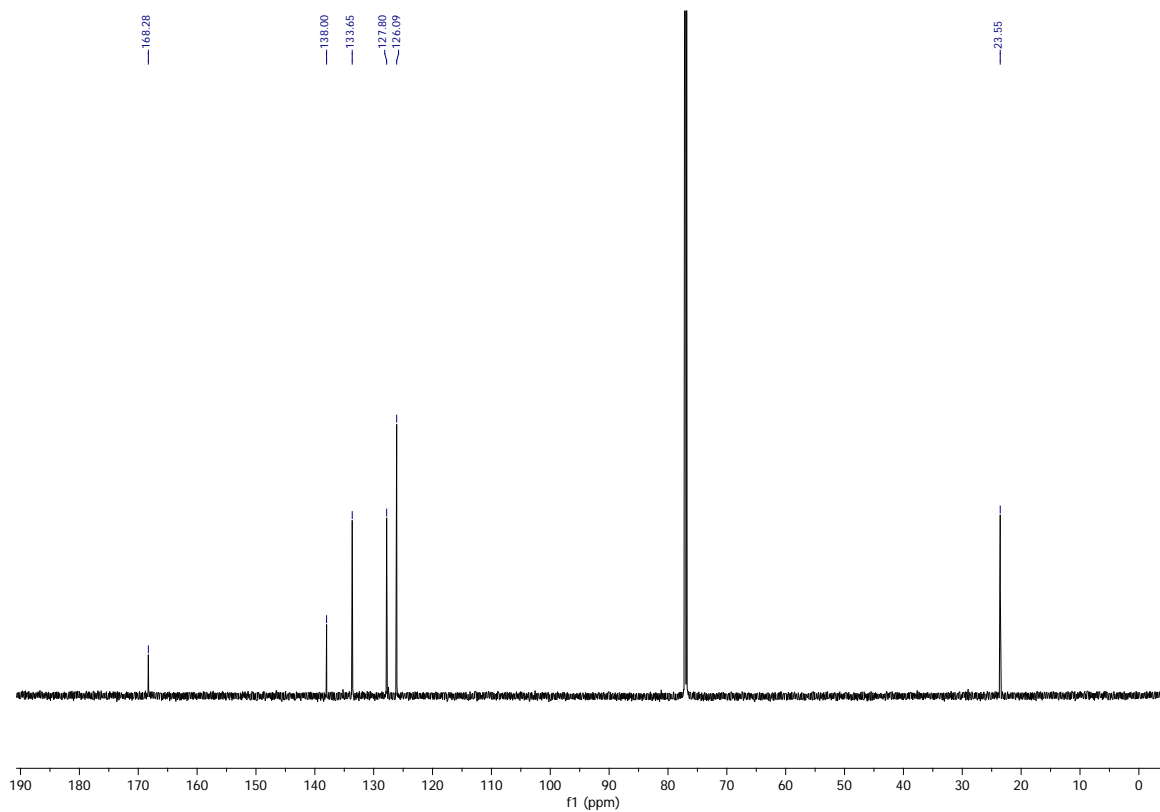

**N-((5-chlorothiophen-2-yl)sulfonyl)acetamide (S10)**

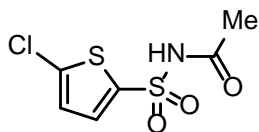

To a flame dried 100 mL round bottom flask equipped with a magnetic stir bar was added 5-chlorothiophene-2-sulfonamide (500 mg, 2.53 mmol), DMAP (3.09 mg, 0.0253 mmol), CH<sub>2</sub>Cl<sub>2</sub> (35.0 mL), and THF (5.00 mL). Then the reaction was cooled to 0 °C and via syringe was added pyridine (0.611 mL, 7.59 mmol) followed by acetic anhydride (0.956 mL, 10.1 mmol). The whole slowly became more homogeneous over a few minutes. The reaction was slowly allowed to warm to rt while stirring for 12 h. Upon completion of the reaction as judged by TLC analysis (50% EtOAc in Hex), the reaction was concentrated under reduced pressure to give a light yellow oil. This crude mixture was diluted with CH<sub>2</sub>Cl<sub>2</sub> (25 mL) then washed 3x with 1 N HCl (20 mL). The organic layer was washed with brine, dried over sodium sulfate, and filtered to give a white solid. Purification by flash column chromatography (10 to 50% EtOAc in Hex elution gradient) provided the title substrate as a compact white powder (486 mg, 77%).

**<sup>1</sup>H NMR** (700 MHz, CDCl<sub>3</sub>): δ = 8.69 (s, 1H), 7.69 (d, *J* = 4.1 Hz, 1H), 6.97 (d, *J* = 4.1 Hz, 1H), 2.14 (s, 3H) ppm

**<sup>13</sup>C NMR** (176 MHz, CDCl<sub>3</sub>): δ = 168.1, 140.0, 136.0, 134.7, 126.8, 23.6 ppm

**R<sub>f</sub>** (5:5 – EtOAc:Hex) = 0.4

**IR** (*neat*): 3076, 2874, 1689, 1463, 1409, 1357, 1235, 1162, 1004, 990 cm<sup>-1</sup>

**HRMS** (ESI+) *m/z* calculated for C<sub>6</sub>H<sub>6</sub>ClNO<sub>3</sub>S<sub>2</sub> [M+H]<sup>+</sup> 239.9550, found 239.9548.

**MP:** 106–109 °C

$^1\text{H}$  NMR (700 MHz,  $\text{CDCl}_3$ ) for S10

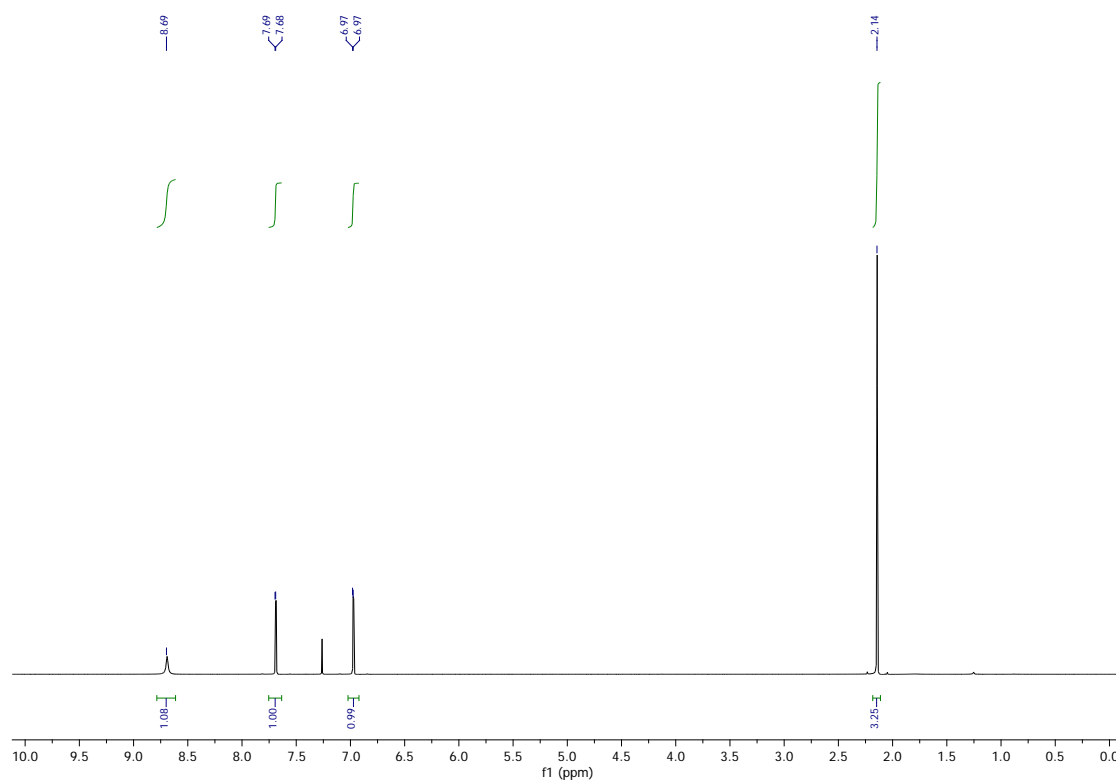

$^{13}\text{C}$  NMR (176 MHz,  $\text{CDCl}_3$ ) for S10

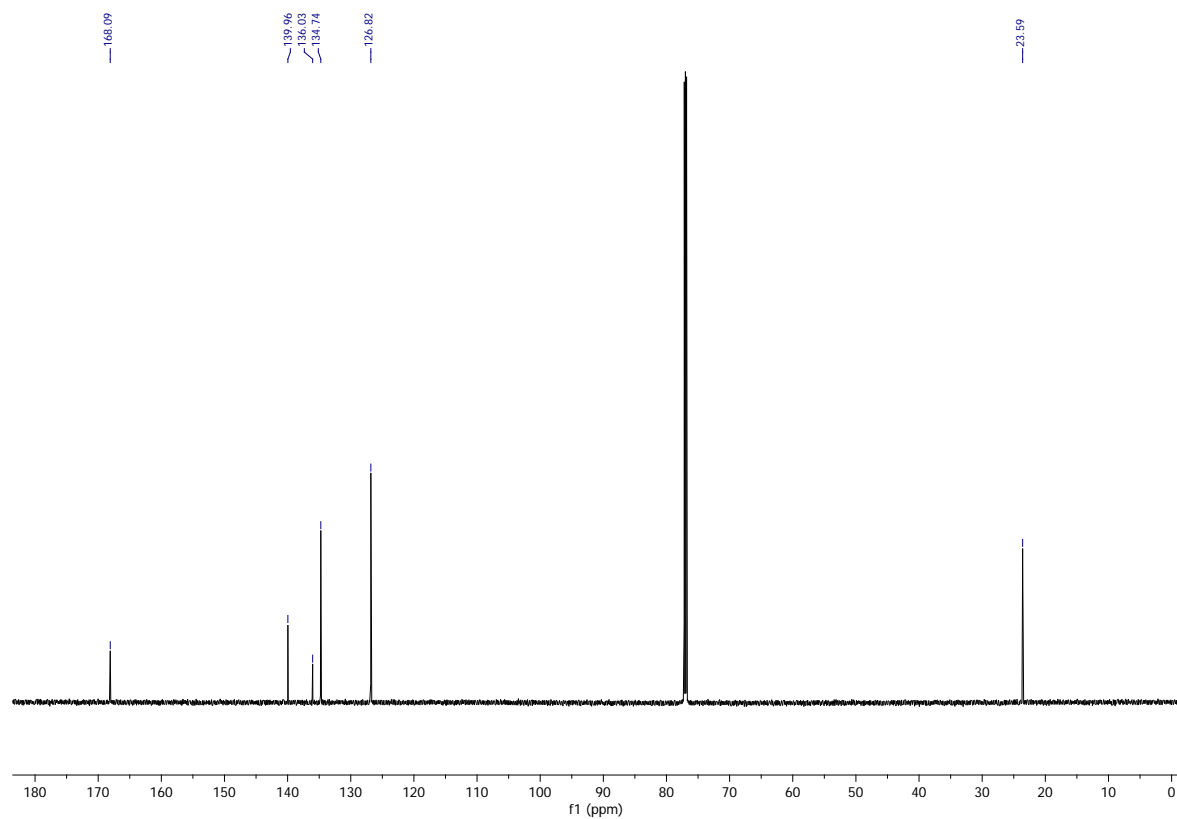

**N-((5-bromothiophen-2-yl)sulfonyl)acetamide (S11)**

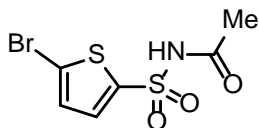

To a flame dried 100 mL round bottom flask equipped with a magnetic stir bar was added 5-bromothiophene-2-sulfonamide (1000 mg, 4.13 mmol), DMAP (5.05 mg, 0.0413 mmol), CH<sub>2</sub>Cl<sub>2</sub> (35.0 mL), and THF (5.0 mL). Then the reaction was cooled to 0 °C and via syringe was added pyridine (1.0 mL, 12.4 mmol) followed by acetic anhydride (1.56 mL, 16.5 mmol). The whole slowly became more homogeneous over a few minutes. The reaction was slowly allowed to warm to rt while stirring for 12 h. Upon completion of the reaction as judged by TLC analysis (50% EtOAc in Hex), the reaction was concentrated under reduced pressure to give a light yellow oil. This crude mixture was diluted with CH<sub>2</sub>Cl<sub>2</sub> (25 mL) then washed 3 x with 1 N HCl (20 mL). The organic layer was washed with brine, dried over sodium sulfate, and filtered to give a white solid. Purification by flash column chromatography (10 to 50% EtOAc in Hex elution gradient) provided the title substrate as a compact white powder (1.07 g, 91%).

**<sup>1</sup>H NMR** (700 MHz, CDCl<sub>3</sub>): δ = 8.62 (s, 1H), 7.64 (d, *J* = 4.1 Hz, 1H), 7.11 (d, *J* = 4.1 Hz, 1H), 2.13 (s, 3H) ppm

**<sup>13</sup>C NMR** (176 MHz, CDCl<sub>3</sub>): δ = 168.0, 138.9, 135.4, 130.4, 122.7, 23.6 ppm

**R<sub>f</sub>** (5:5 – EtOAc:Hex) = 0.3

**IR** (*neat*): 3301, 1713, 1412, 1395, 1209, 1155, 1025, 799, 678 cm<sup>-1</sup>

**HRMS** (ESI+) *m/z* calculated for C<sub>6</sub>H<sub>6</sub>BrNO<sub>3</sub>S<sub>2</sub> [M+Na]<sup>+</sup> 305.8865, found 305.8869.

**MP**: 110–113 °C

<sup>1</sup>H NMR (700 MHz, CDCl<sub>3</sub>) for S11

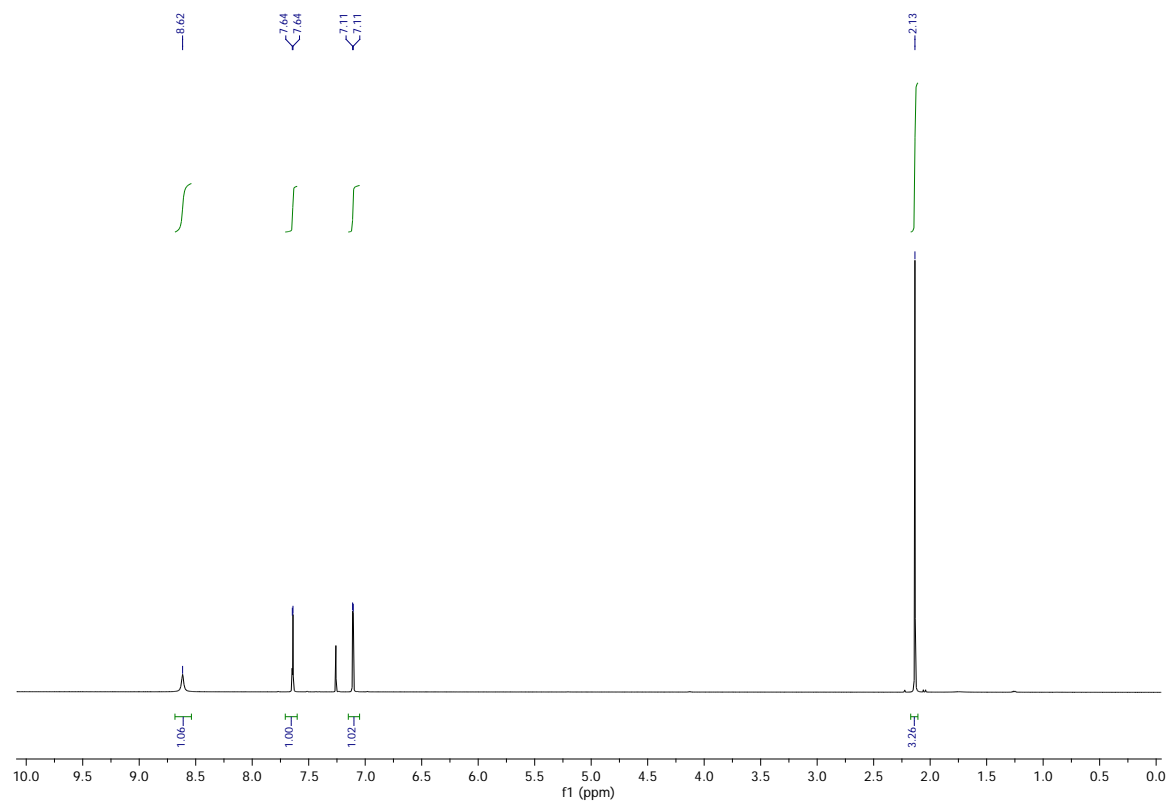

<sup>13</sup>C NMR (176 MHz, CDCl<sub>3</sub>) for S11

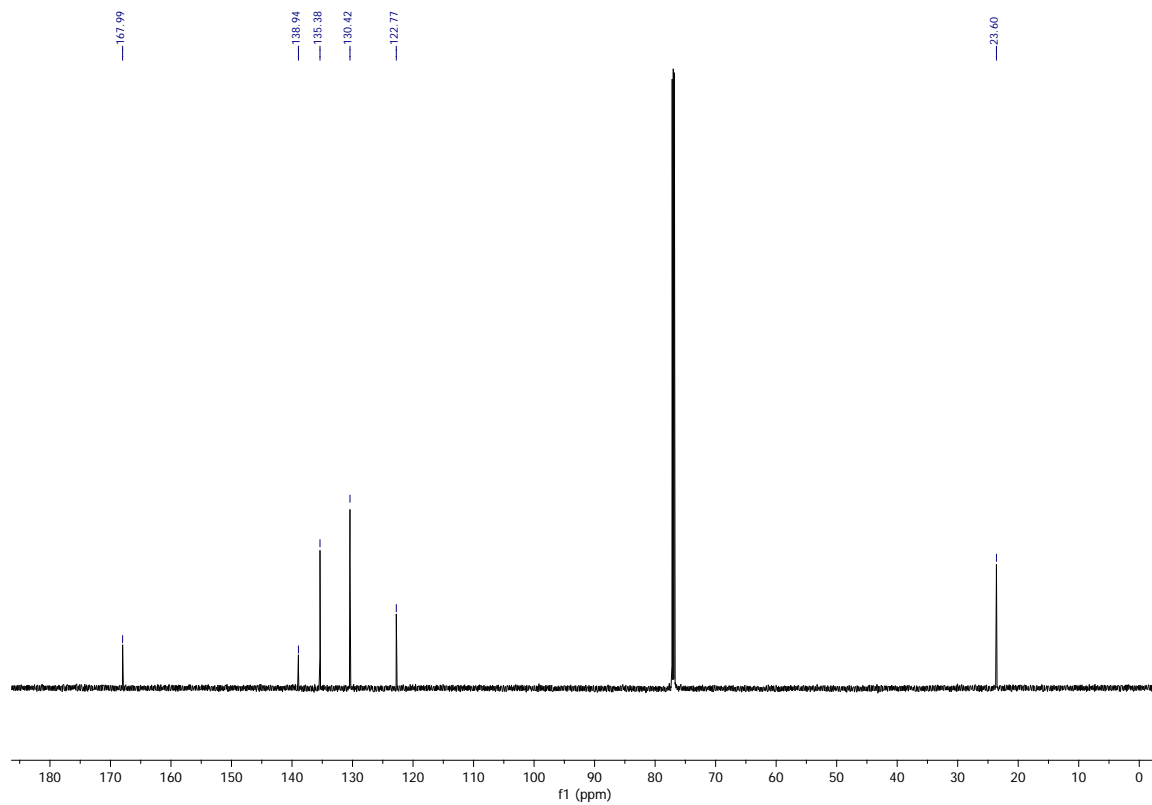

### **N-(benzo[d]thiazol-2-ylsulfonyl)acetamide (S12)**

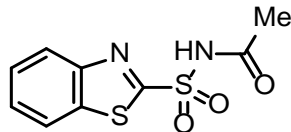

To a flame dried 100 mL round bottom flask equipped with a magnetic stir bar was added 1,3-benzothiazole-2-sulfonamide (294 mg, 1.37 mmol), DMAP (1.68 mg, 0.0137 mmol), CH<sub>2</sub>Cl<sub>2</sub> (35.0 mL), and THF (5.0 mL). Then the reaction was cooled to 0 °C and via syringe was added pyridine (0.322 mL, 4.12 mmol) followed by acetic anhydride (0.519 mL, 5.49 mmol). The whole slowly became more homogeneous over a few minutes. The reaction was slowly allowed to warm to rt while stirring for 12 h. Upon completion of the reaction as judged by TLC analysis (50% EtOAc in Hex), the reaction was concentrated under reduced pressure to give a light yellow oil. This crude mixture was diluted with CH<sub>2</sub>Cl<sub>2</sub> (25 mL) then washed 3 x with 1 N HCl (20 mL). The organic layer was washed with brine, dried over sodium sulfate, and filtered to give a white solid. Purification by flash column chromatography (10 to 50% EtOAc in Hex elution gradient) provided the title substrate as a compact white solid (443 mg, 99%).

**<sup>1</sup>H NMR** (700 MHz, DMSO-d<sub>6</sub>): δ = 13.06 (s, 1H), 8.31 (d, *J* = 7.8 Hz, 1H), 8.23 (d, *J* = 7.9 Hz, 1H), 7.75 – 7.61 (m, 2H), 2.04 (s, 3H) ppm

**<sup>13</sup>C NMR** (176 MHz, DMSO-d<sub>6</sub>): δ = 169.7, 165.4, 151.4, 136.3, 128.1, 127.9, 124.7, 123.3, 23.4 ppm

**R<sub>f</sub>** (5:5 – EtOAc:Hex) = 0.1

**IR** (*neat*): 3022, 2855, 1726, 1484, 1358, 1162, 1132, 1094, 994 cm<sup>-1</sup>

**HRMS** (ESI+) *m/z* calculated for C<sub>9</sub>H<sub>8</sub>N<sub>2</sub>O<sub>3</sub>S<sub>2</sub> [M+H]<sup>+</sup> 257.0049, found 257.0052.

**MP:** 194–197 °C

<sup>1</sup>H NMR (700 MHz, DMSO-d<sub>6</sub>) for S12

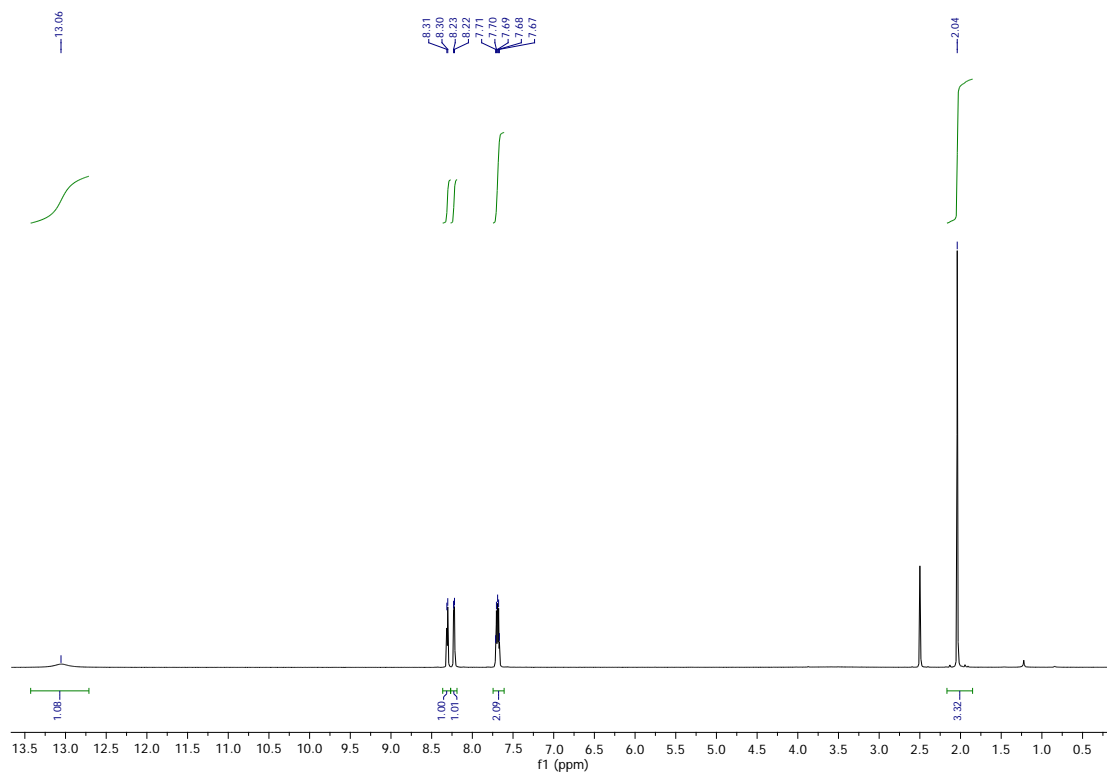

<sup>13</sup>C NMR (176 MHz, DMSO-d<sub>6</sub>) for S12

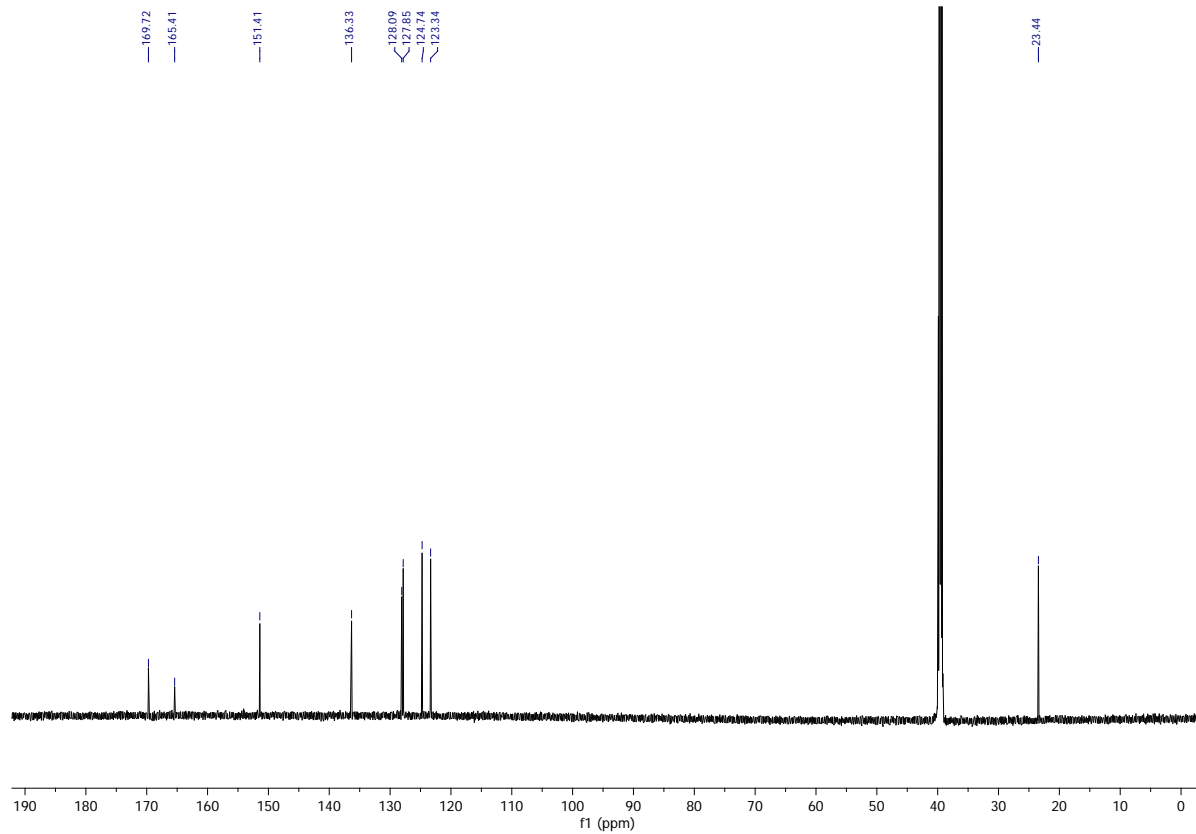

**(E)-N-(styrylsulfonyl)acetamide (S13)**

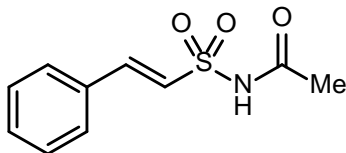

A 25 mL flame dried round bottom flask charged with a magnetic stir bar was added KOH (91.9 mg, 1.64 mmol) and (*E*)-2-phenylethanesulfonamide (100 mg, 0.546 mmol). The flask was septa capped and put under nitrogen, before diluting in CH<sub>2</sub>Cl<sub>2</sub> [0.2 M]. This reaction was then cooled to 0 °C followed by dropwise addition of AcCl (58.2 μL, 1.5 equiv) to the reaction. Over 2.5 hours, the reaction was allowed to warm to room temperature. The reaction was quenched by adding 4 M HCl at 0 °C to equal the mmol of KOH added. This was then diluted in water and extracted 3x with CH<sub>2</sub>Cl<sub>2</sub>. The CH<sub>2</sub>Cl<sub>2</sub> layers were combined dried over sodium sulfate, filtered and concentrated to provide the crude residue which was purified by column chromatography (4:6 EtOAc to Hexanes) to afford the desired acetamide (52 mg, 42%).

**<sup>1</sup>H NMR** (400 MHz, DMSO-d<sub>6</sub>) δ = 11.84 (s, 1H), 7.75 (d, *J* = 6.3 Hz, 2H), 7.60 – 7.35 (m, 5H), 1.97 (s, 3H) ppm

**<sup>13</sup>C NMR** (126 MHz, DMSO-d<sub>6</sub>) δ = 169.1, 142.6, 132.3, 131.1, 129.1, 128.9, 125.9, 23.4 ppm

**R<sub>f</sub>** (1:1 – EtOAc:Hex) = 0.4

**IR** (*neat*): 3243, 3049, 1714, 1615, 1417, 1369, 1326, 1213, 1199, 1142, 1039, 991, 968, 944, 869, 824, 805, 744, 687, 651, 631, 609 cm<sup>-1</sup>

**HRMS** (ESI+) *m/z* calculated for [M+H]<sup>+</sup> 226.0532, found 226.0532.

**MP:** 108–111 °C



<sup>1</sup>H NMR (400 MHz, DMSO--d6) for S13

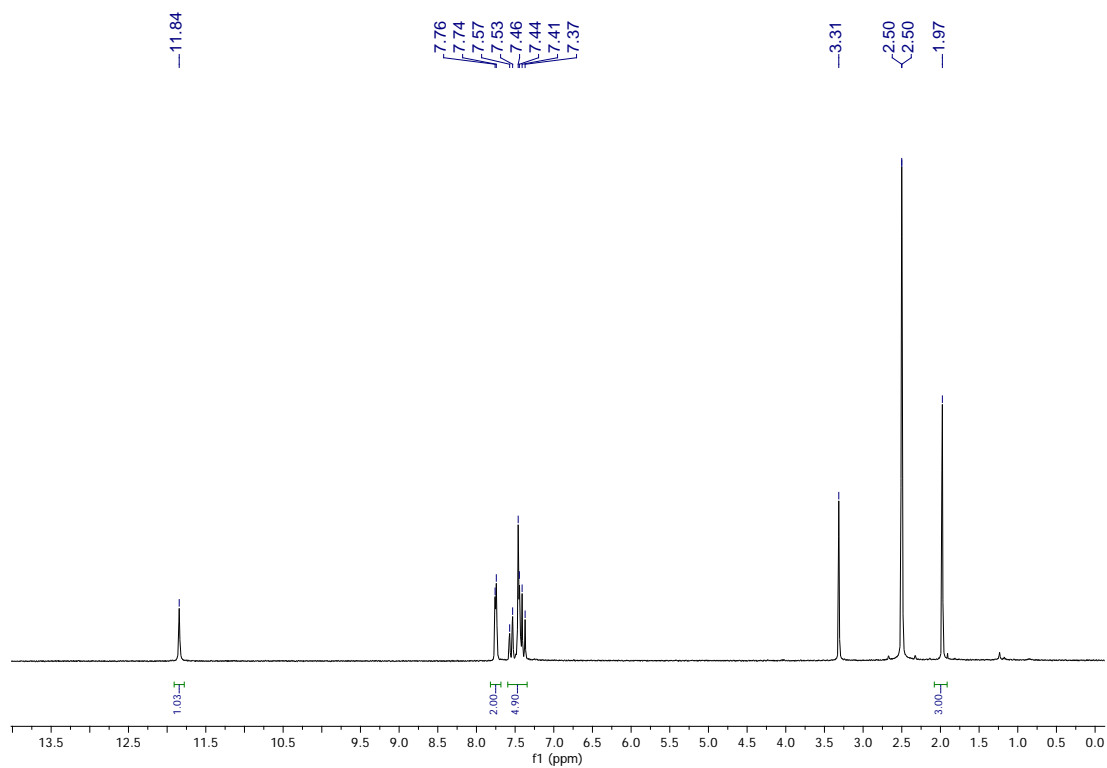

<sup>13</sup>C NMR (126 MHz, DMSO-d6) for S13

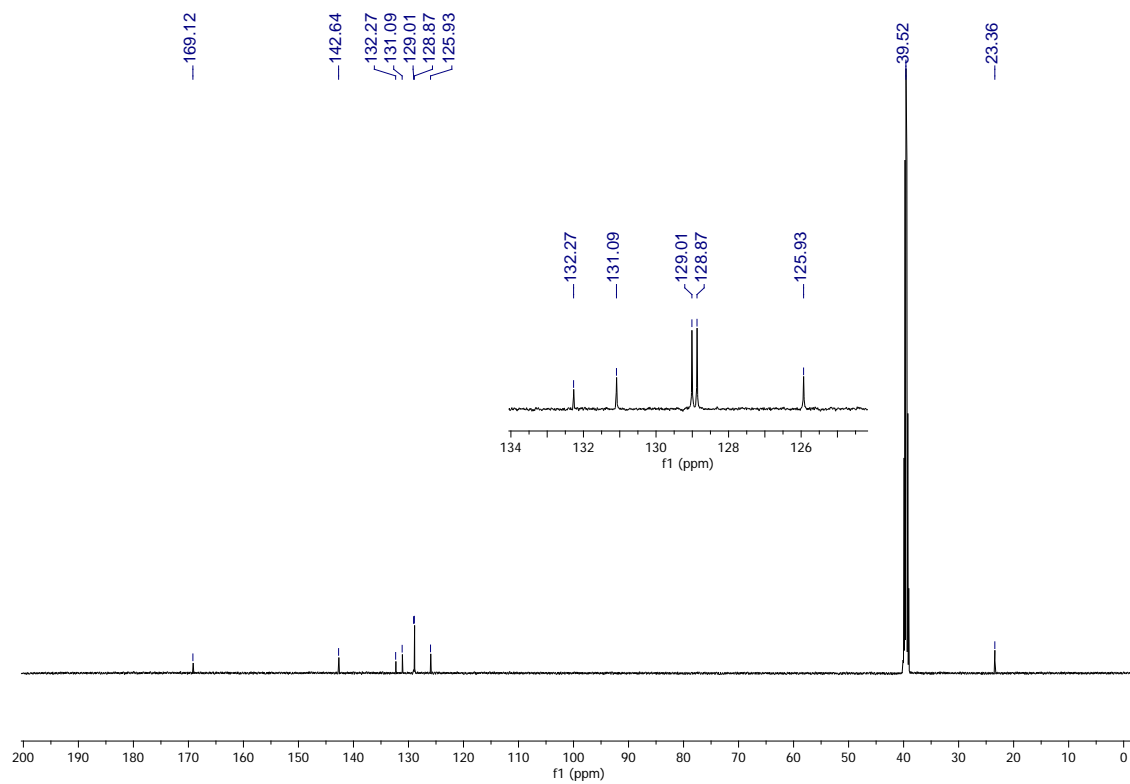

### **N-(naphthalen-1-ylsulfonyl)hexanamide (S14)**

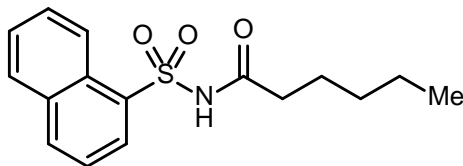

To a dry round bottom flask hexanoic acid (420 mg, 3.62 mmol) was added and diluted into 6 mL of DCM and 100  $\mu$ L of DMF. This solution was cooled to 0°C and oxalyl chloride was added neat and dropwise over the course of 3 minutes. The reaction was stirred at 0°C for 30 minutes. Then the reaction was warmed to room temperature and concentrated *in vacuo* to a thick yellow oil. The reaction was then taken back up into a fresh supply of 6 mL of DCM, followed by naphthalene-1-sulfonamide (500 mg, 2.41 mmol) in one portion. Slow addition of pyridine (389  $\mu$ L, 2 equiv) and DMAP (14.7 mg, 0.05 eq), occurred with considerable exotherm. The reaction was then stirred for 15 hours, and stopped by the addition of 10 mL of water. The whole was transferred to a separatory funnel and extracted three times with 15 mL of ethyl acetate. The combine organic layer was then washed with saturated sodium bicarbonate followed by saturated sodium chloride solutions. Drying over magnesium sulfate and concentration *in vacuo* afforded an orange oil that was purified on column (0-50% EtOAc in Hexanes) to afford N-(1-naphthylsulfonyl)hexanamide (382 mg, 1.25 mmol, yield: 52%)

**<sup>1</sup>H NMR** (700 MHz, DMSO-d<sub>6</sub>)  $\delta$  12.40 (s, 1H), 8.61 (d, J = 8.6 Hz, 1H), 8.33 (d, J = 7.4 Hz, 2H), 8.16 (m, 1H), 7.79 (t, J = 7.0 Hz, 1H), 7.76 – 7.69 (m, 2H), 1.36 – 1.28 (m, 2H), 1.04 (m, 2H), 0.90 (m, 2H), 0.66 (dt, J = 7.2, 5.3 Hz, 3H) ppm

**<sup>13</sup>C NMR** (176 MHz, DMSO-d<sub>6</sub>)  $\delta$  = 172.4, 135.9, 134.8, 134.5, 132.1, 130.1, 129.2, 128.2, 127.8, 125.3, 124.5, 36.3, 31.1, 24.7, 22.5, 14.5 ppm

**R<sub>f</sub>** = 0.5 in 1:1 Hexanes:EtOAc

**IR** (neat): 3301, 2958, 2926, 2869, 1713, 1506, 1472, 1442, 1411, 1364, 1324, 1271, 1221, 1204, 1177, 1160, 1144, 1131, 1085, 1057, 1035, 975, 945, 864, 807.3, 797.5, 776.3, 741, 678, 653, 636 cm<sup>-1</sup>

**HRMS** (ESI+) *m/z* calculated for [M+H]<sup>+</sup> 306.1164, found 306.1158.

<sup>1</sup>H NMR (700 MHz, DMSO-d6) for S14

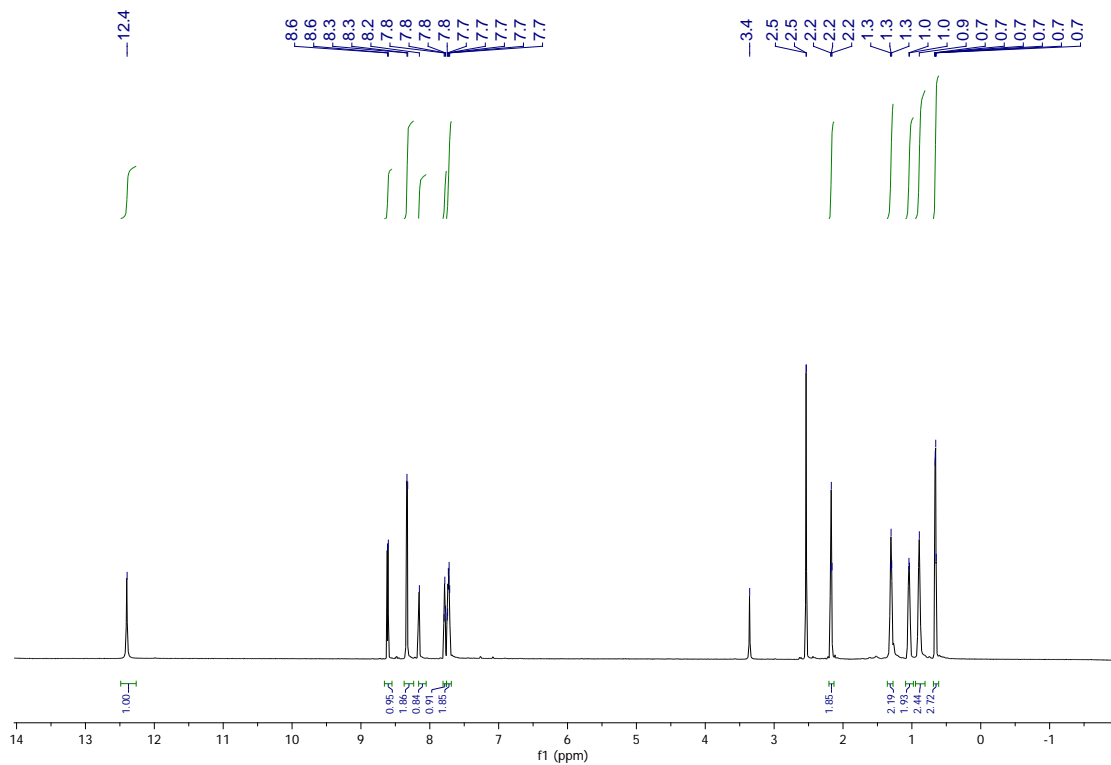

<sup>13</sup>C NMR (175 MHz, DMSO-d6) for S14

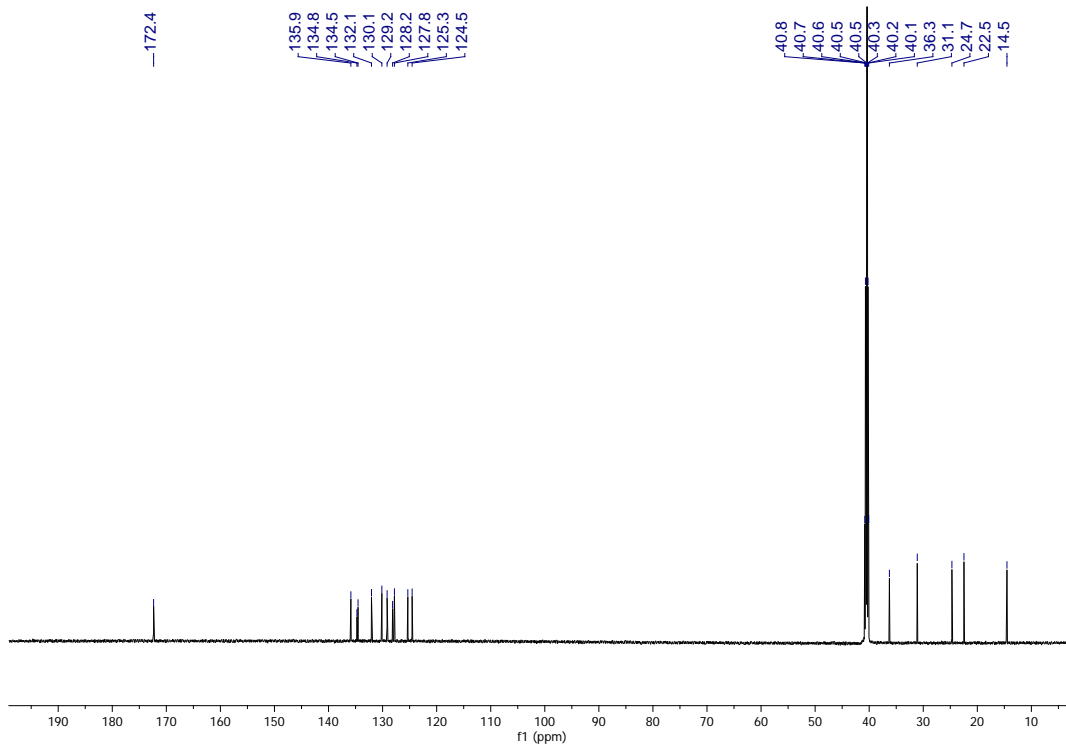

**p-methoxybenzene alkenes:**

**1-methoxy-4-vinylbenzene (1)**

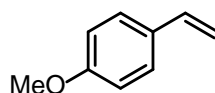

Vinyl-anisole was purchased from Sigma Aldrich (97%, item # 141003) and was distilled under hi-vac (~ 13 mbar), at 60 °C. It was then stored in the dark, under argon in a 4 dram vial for the remainder of the work.

**(E)-1-methoxy-4-(prop-1-en-1-yl)benzene (S15)**

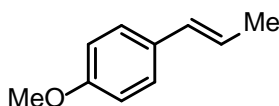

*trans*-Anethole was purchased from AK Scientific (98%, item # X8716) and was used as received. The material was stored in the dark and under argon when not in use.

**(Z)-1-methoxy-4-(prop-1-en-1-yl)benzene (28)**

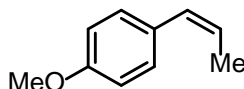

Z-anethole preparation was repeated based on the procedure detailed by Yoon and co-workers (47). (*Step 1*): To a dry round bottom flask, 1-ethynyl-4-methoxy-benzene (1000 mg, 7.57 mmol) was added as a clear liquid and diluted into solution with 20 mL of THF. The solution was cooled to -78°C for 30 minutes and then the starting material was deprotonated with the dropwise addition of LiHMDS (8.323 µL, 1.1 equiv) over the course of 10 minutes. The solution was allowed to stir and deprotonate for 30 minutes. Following this time, MeI (565 µL, 1.2 equiv) was added dropwise, and the reaction was allowed to stir another 30 minutes before warming to room temperature. The reaction was quenched with 4 mL of saturated aqueous ammonium chloride solution, and diluted in 30 mL of water. The whole was transferred to a separatory funnel where 20 mL of diethyl ether was added and the layers were separated. The aqueous layer was then extracted twice more with 30 mL of diethylether each time. The combined organic layer was then washed with saturated sodium chloride solution and dried over magnesium sulfate. Concentration *in vacuo* produced an orange oil that was then purified by a short column (0-5% EtOAc in Hexanes) to afford 1-methoxy-4-prop-1-ynyl-benzene which was taken directly onto the next step.

(Step 2): To a flame dried flask, a solution of cyclohexene (15.2 mmol, 2.11 equiv, 1601  $\mu\text{L}$ ) was diluted in 8 mL of THF. The solution was cooled to 0°C and then a 2.0 M solution of  $\text{BH}_3\cdot\text{DMS}$  complex in toluene was added (749 $\mu\text{L}$ m 1.1 equiv). After 10 minutes the reaction becomes heterogeneous, and this was allowed to stir for another twenty minutes. After this time, 1-methoxy-4-prop-1-ynyl-benzene was added as a 1 M solution in THF, to the reaction at 0°C. This was allowed to stir for 45 minutes, followed by quenching with 1 mL of glacial acetic acid. The acid quench was allowed to stir for 45 minutes and warm up to room temperature. The reaction solution was transferred to a separatory funnel and diluted in 30 mL of water. The layers were separated and the aqueous layer was extracted twice more with 30 mL of diethyl ether each time. The combined organic layer was washed with saturated sodium bicarbonate followed by saturated aqueous sodium chloride solution. Drying over magnesium sulfate followed by concentration *in vacuo* afforded an oil that was purified by silica chromatography (0-5% EtOAc in Hexanes). The spectral data of 1-methoxy-4-[(Z)-prop-1-enyl]benzene (512 mg, 49% yield) was consistent with the literature (48).

### **1-(cyclopent-1-en-1-yl)-4-methoxybenzene (S16)**

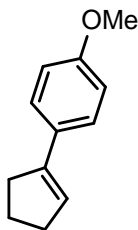

The following procedure was followed according to that reported in the literature for the preparation of the title substrate.

$\text{CeCl}_3\cdot 7\text{H}_2\text{O}$  (2218 mg, 9.00 mmol) was quickly ground to a fine powder in a mortar, placed in a three-neck 250 mL round bottom flask and dried at 140 °C for 2 h. At rt, nitrogen gas was introduced, and anhydrous THF (25 mL) was added with vigorous stirring. The suspension was stirred for 1.5 h at rt. To a cold (-78 °C) and stirred solution of 4-bromoanisole (0.828 mL, 6.60 mmol) in anhydrous THF (25 mL) was added 1.6 M *n*BuLi in hexanes (4.50 mL, 7.20 mmol). This solution was stirred at -78 °C for 1.5 h then added to the cold (-78 °C) suspension of  $\text{CeCl}_3$  in THF. The resulting solution was stirred at -78 °C for 1 h. Cyclopentanone (0.531 mL) 6.00 mmol) dissolved in anhydrous THF (5 mL) was added to the corresponding organocerium reagent. The resulting mixture was stirred at -78 °C for 1h then at rt for 1 h. At -30 °C, after dilution with anhydrous THF (20 mL), DBU (2.32 mL, 10.5 mmol, 3 equiv) then MsCl (1.39 mL, 10.5 mmol, 3 equiv) were added dropwise. The reaction mixture was then allowed to warm to rt and stirred overnight. At 0 °C, aqueous HCl 1 M (15 mL) was added and the solution was stirred for 1 h. The aqueous layer was extracted with  $\text{Et}_2\text{O}$  (3 x 30 mL). The resulting organic layers were washed with aqueous NaOH 2 M (10 mL), water (10 mL), brine (10 mL), dried over sodium sulfate and the solvent evaporated to provide a light yellow oil. The residue was purified by flash column chromatography on silica gel using

a 0 to 1% EtOAc in Hex elution gradient to provide the desired olefin as a white fluffy powder (616 mg, 59%).

All analytical data matches that reported in the literature (49).

**<sup>1</sup>H NMR** (700 MHz, CDCl<sub>3</sub>): δ = 7.38 (d, *J* = 8.7 Hz, 2H), 6.86 (d, *J* = 8.7 Hz, 2H), 6.08 – 5.99 (m, 1H), 3.81 (s, 3H), 2.68 (td, *J* = 7.8, 2.1 Hz, 2H), 2.52 (td, *J* = 7.7, 2.3 Hz, 2H), 2.08 – 1.95 (m, 2H) ppm

**<sup>13</sup>C NMR** (176 MHz, CDCl<sub>3</sub>): δ = 158.5, 141.8, 129.7, 126.7, 123.9, 113.6, 55.3, 33.3, 33.2, 23.4 ppm

**R<sub>f</sub>** (1:9 – EtOAc:Hex) = 0.6

**IR** (*neat*): 2951, 2894, 2841, 1601, 1510, 1309, 1252, 1180, 1030 cm<sup>-1</sup>

**HRMS** (EI) *m/z* calculated for C<sub>12</sub>H<sub>14</sub>O [M<sup>+</sup>] 174.1045, found 174.1042.

<sup>1</sup>H NMR (700 MHz, CDCl<sub>3</sub>) for S16

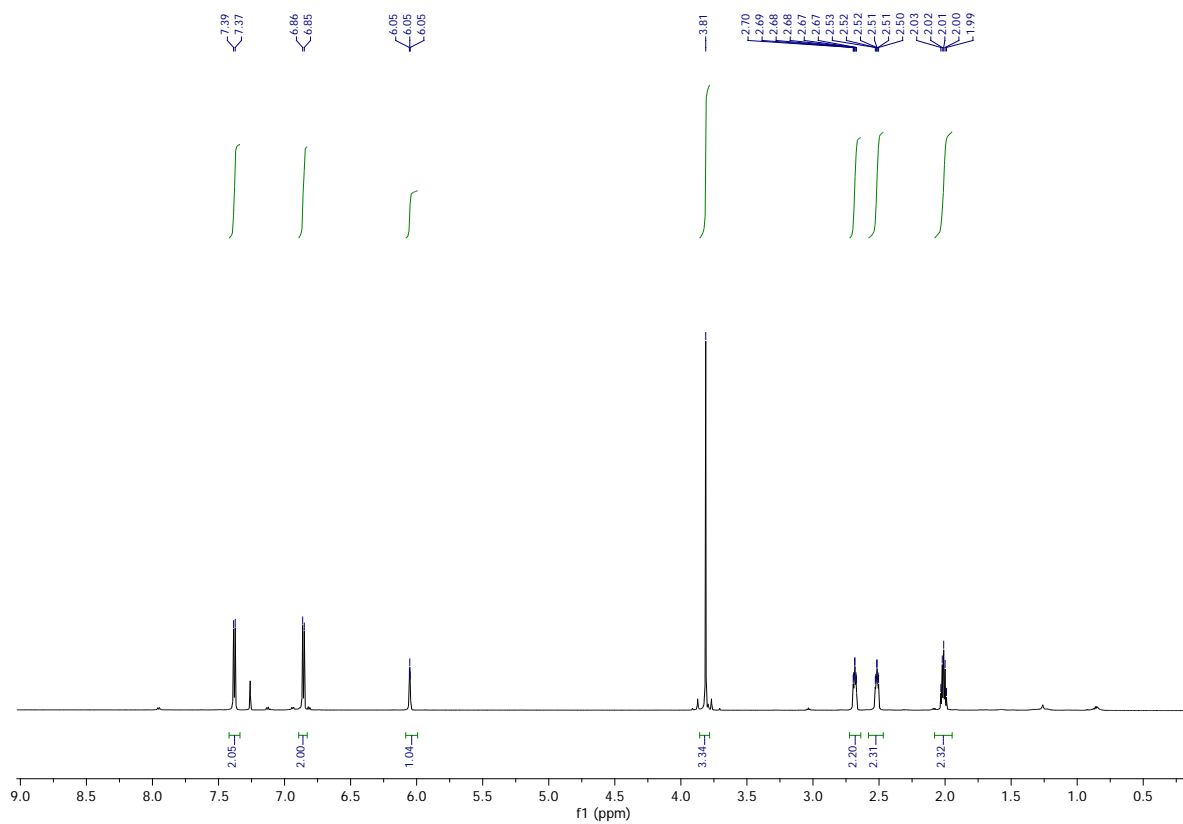

<sup>13</sup>C NMR (176 MHz, CDCl<sub>3</sub>) for S16

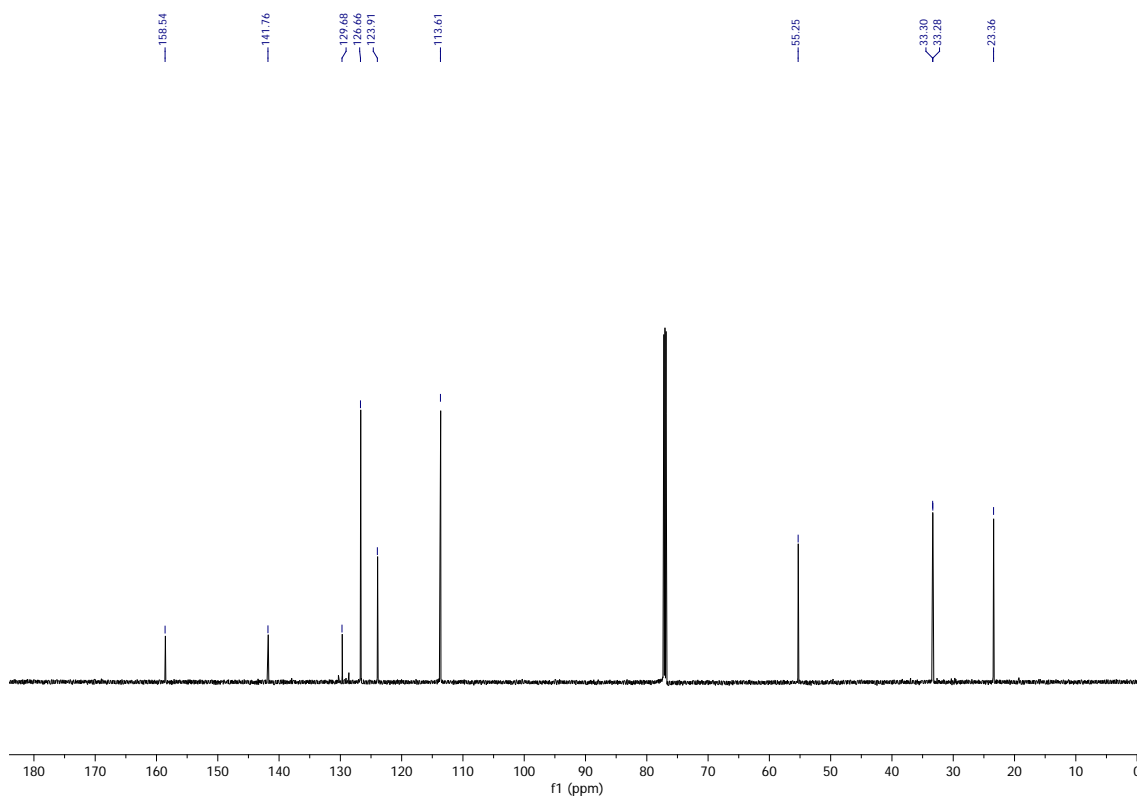

### 1-(4-methoxyphenyl)cyclohept-1-ene (S17)

The following procedure was followed according to that reported in the literature for the preparation of the title substrate.

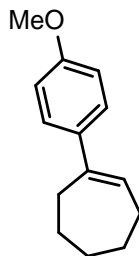

CeCl<sub>3</sub>·7H<sub>2</sub>O (2218 mg, 9.00 mmol) was quickly ground to a fine powder in a mortar, placed in a three-neck 250 mL round bottom flask and dried at 140 °C for 2 h. At rt, nitrogen gas was introduced, and anhydrous THF (25 mL) was added with vigorous stirring. The suspension was stirred for 1.5 h at rt. To a cold (-78 °C) and stirred solution of 4-bromoanisole (0.828 mL, 6.60 mmol) in anhydrous THF (25 mL) was added 1.6 M nBuLi in hexanes (4.50 mL, 7.20 mmol). This solution was stirred at -78 °C for 1.5 h then added to the cold (-78 °C) suspension of CeCl<sub>3</sub> in THF. The resulting solution was stirred at -78 °C for 1 h. Cycloheptanone (0.709 mL, 6.00 mmol) dissolved in anhydrous THF (5 mL) was added to the corresponding organocerium reagent. The resulting mixture was stirred at -78 °C for 1 h then at rt for 1 h. At -30 °C, after dilution with anhydrous THF (20 mL), DBU (2.32 mL, 10.5 mmol, 3 equiv) then MsCl (1.39 mL, 10.5 mmol, 3 equiv) were added dropwise. The reaction mixture was then allowed to warm to rt and stirred overnight. At 0 °C, aqueous HCl 1 M (15 mL) was added and the solution was stirred for 1 h. The aqueous layer was extracted with Et<sub>2</sub>O (3 x 30 mL). The resulting organic layers were washed with aqueous NaOH 2 M (10 mL), water (10 mL), brine (10 mL), dried over sodium sulfate and the solvent evaporated to provide a light yellow oil. The residue was purified by flash column chromatography on silica gel using a 0 to 1% EtOAc in Hex elution gradient to provide the desired olefin as a colorless oil (655 mg, 54%).

All analytical data matches that reported in the literature (48).

**<sup>1</sup>H NMR** (700 MHz, CDCl<sub>3</sub>): δ = 7.27 (d, *J* = 8.7 Hz, 2H), 6.85 (d, *J* = 8.6 Hz, 2H), 6.03 (t, *J* = 6.7 Hz, 1H), 3.81 (s, 3H), 2.64 – 2.54 (m, 2H), 2.28 (dd, *J* = 11.0, 6.5 Hz, 2H), 1.84 (dt, *J* = 11.8, 6.0 Hz, 2H), 1.64 (dt, *J* = 11.3, 5.8 Hz, 2H), 1.56 (dt, *J* = 11.3, 5.9 Hz, 2H) ppm

**<sup>13</sup>C NMR** (176 MHz, CDCl<sub>3</sub>): δ = 158.2, 144.3, 137.5, 128.8, 126.7, 113.4, 55.3, 32.8, 32.7, 28.8, 26.9, 26.8 ppm

**R<sub>f</sub>** (1:9 – EtOAc:Hex) = 0.8

**IR** (*neat*): 2916, 2834, 1606, 1509, 1489, 1286, 1242, 1177, 1032 cm<sup>-1</sup>



HRMS (ESI+)  $m/z$  calculated for  $C_{14}H_{18}O$   $[M+H]^+$  203.1430, found 203.1424.

$^1H$  NMR (700 MHz,  $CDCl_3$ ) for S17

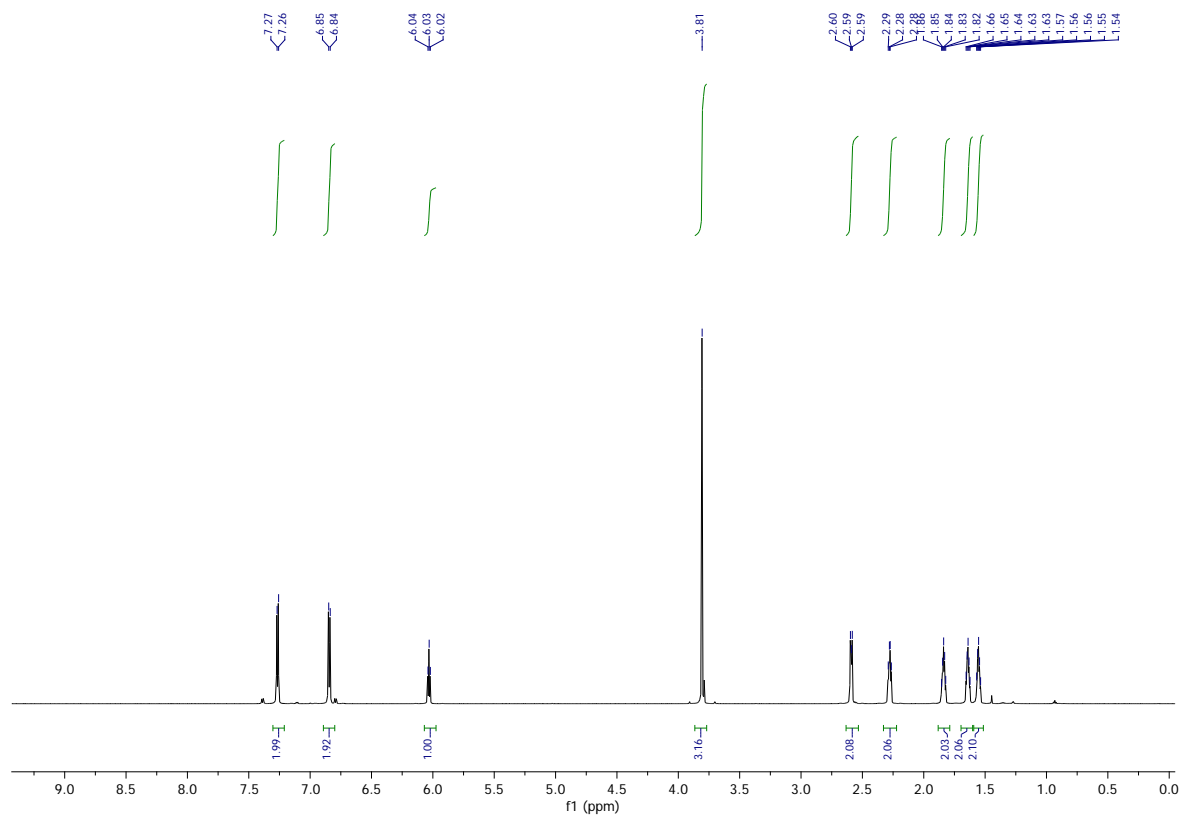

$^{13}C$  NMR (176 MHz,  $CDCl_3$ ) for S17

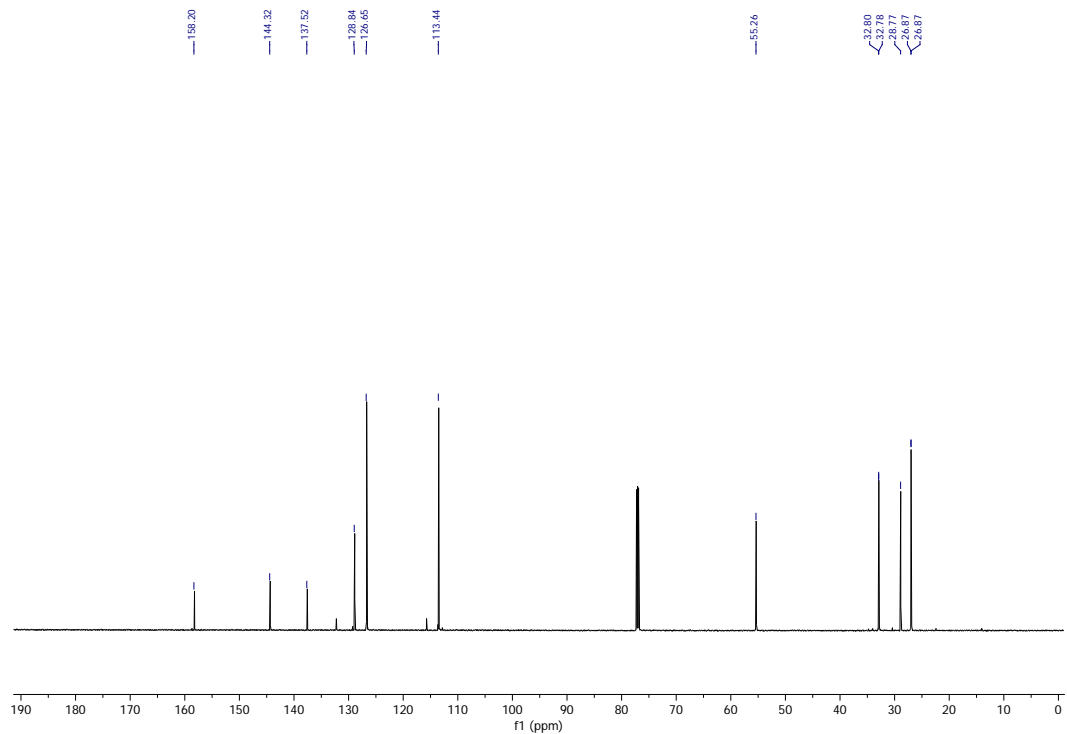

### ***N*-[(*E*)-3-(4-methoxyphenyl)allyl]-4-methyl-*N*-phenacyl-benzenesulfonamide (S18)**

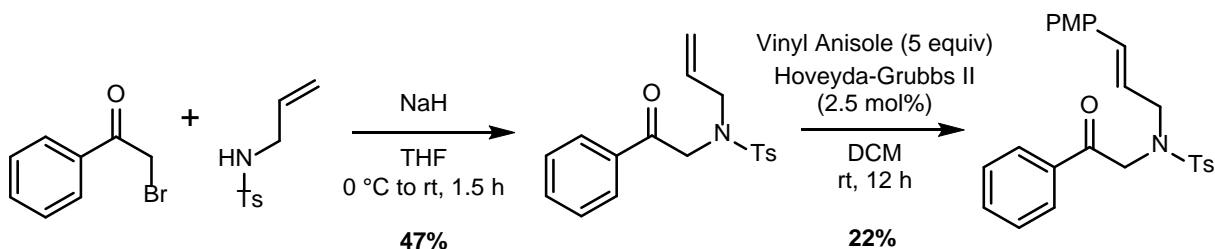

To a flame dried 50 mL round bottom flask charged with a magnetic stir bar was added *N*-allyl-4-methyl-benzenesulfonamide (637 mg, 3.01 mmol, 1.2 equiv) 5 mL of DMF. To this, NaH (60%, 86.6 mg, 2.26 mmol, 0.9 equiv) was added portion-wise to the flask and the sulfonamide was allowed to react at 0 °C for 30 minutes. After this time, 2-bromo-1-phenyl-ethanone (500 mg, 2.51 mmol, 1 equiv), was diluted separately in 6 mL of DMF and transferred to the reaction via syringe at 0 °C. The reaction was slowly allowed to warm to room temperature over 1 h, and then quenched with 7 mL of aqueous 5% citric acid and 7 mL of 10% sodium thiosulfate at 0 °C. The mixture was then transferred to a separatory funnel and extracted 3 times with 50 mL of diethyl ether. The combined ether extracts were washed with saturated sodium bicarbonate solution, followed by 5% LiCl wash (equal volume). The combined organic fractions were dried over sodium sulfate and then concentrated *in vacuo* to provide a crude dark oil which was purified by silica gel chromatography (30% EtOAc in Hexanes). *N*-allyl-4-methyl-*N*-phenacyl-benzenesulfonamide isolated in 47% yield (396 mg), and corresponded to literature characterization (50).

To a flame dried 25 mL round bottom flask charged with a magnetic stir bar was added *N*-allyl-4-methyl-*N*-phenacyl-benzenesulfonamide (100 mg, 0.304 mmol), 6 mL of dry CH<sub>2</sub>Cl<sub>2</sub>, followed by 1-methoxy-4-vinyl-benzene (202 μL, 1.52 mmol, 5 equiv). The reaction was sparged by an argon line for 5 minutes. Then Hoveyda-Grubbs II (CAS No. 301224-40-8) (4.76 mg, 0.00759 mmol, 2.5 mol %) was added, the flask was flushed with argon and then the reaction was capped and allowed to stir for 12 hours. Following this time, the crude mixture was pushed through a celite plug and concentrated to provide the crude residue. The material was purified by silica gel chromatography (3:7 ethyl acetate/Hexanes), and the stilbene impurity was triturated out with cold ether, after concentrating to yield 29 mg of the title substrate (22% yield).

**<sup>1</sup>H NMR** (700 MHz, CDCl<sub>3</sub>) δ = 7.89 (d, J = 8.0 Hz, 2H), 7.79 (d, J = 8.1 Hz, 2H), 7.58 (t, J = 7.4 Hz, 1H), 7.45 (t, J = 7.6 Hz, 2H), 7.33 (d, J = 8.2 Hz, 2H), 7.17 (d, J = 8.6 Hz, 2H), 6.33 (d, J = 15.8 Hz, 1H), 6.33 (d, J = 15.8 Hz, 1H), 5.88 (dt, J = 14.6, 7.0 Hz, 1H), 5.88 (dt, J = 14.6, 7.0 Hz, 1H), 4.76 (s, 2H), 4.05 (d, J = 7.0 Hz, 2H), 3.80 (s, 3H), 2.45 (s, 3H) ppm

**<sup>13</sup>C NMR** (176 MHz, CDCl<sub>3</sub>) δ = 194.2, 159.5, 143.4, 136.9, 134.9, 134.4, 133.7, 129.6, 128.7, 128.7, 128.0, 127.7, 127.5, 121.0, 113.9, 55.3, 51.9, 50.5, 21.6 ppm

R<sub>f</sub> (3:7 – EtOAc:Hex) = 0.3

**IR** (*neat*): 2932, 2836, 2254, 1699, 1606, 1579, 1510, 1448, 1420, 1334, 1304, 1249, 1224, 1174, 1154, 1092, 1059, 1032, 1001, 971, 906, 856, 839, 812, 729, 689, 668, 607  $\text{cm}^{-1}$

**HRMS** (ESI+): predicted  $[\text{M}+\text{Na}]^+$  458.1397, observed 458.1389.

$^1\text{H}$  NMR (700 MHz,  $\text{CDCl}_3$ ) for S18

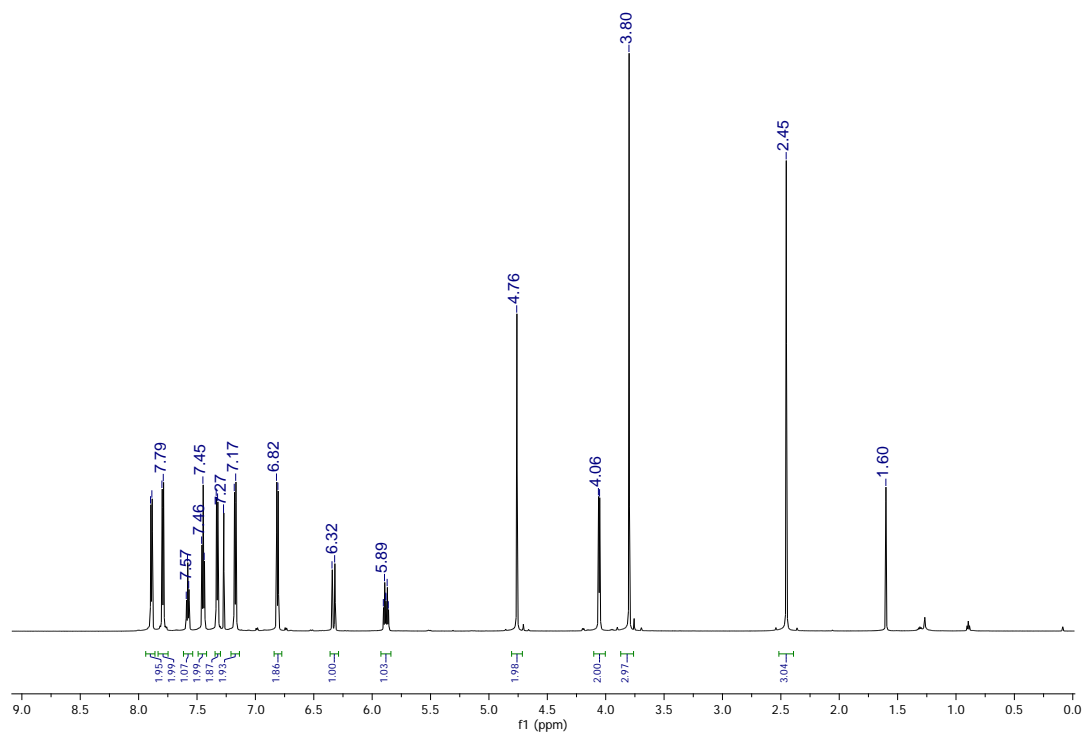

$^{13}\text{C}$  NMR (700 MHz,  $\text{CDCl}_3$ ) for S18

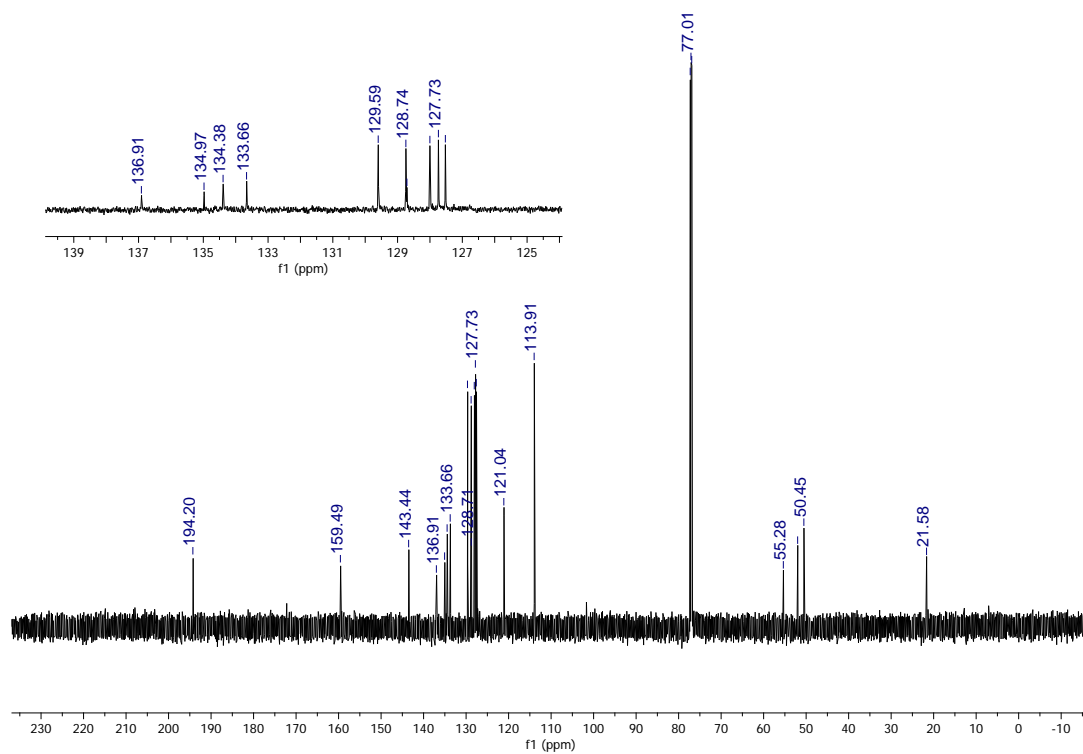

**(E)-3-(4-methoxyphenyl)allyl acetate (S19)**

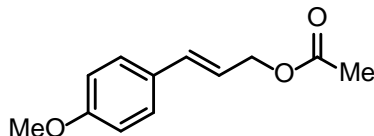

To a solution of (E)-3-(4-methoxyphenyl)prop-2-en-1-ol (200 mg, 1.22 mmol) in CH<sub>2</sub>Cl<sub>2</sub> (15 mL) and THF (5 mL) was added DMAP (14.9 mg, 0.122 mmol). Then the reaction was cooled to 0 °C and via syringe was added pyridine (0.294 mL, 3.65 mmol) followed by acetic anhydride (0.345 mL, 3.65 mmol). The reaction was slowly allowed to warm to rt while stirring for 12 h. Upon completion of the reaction as judged by TLC analysis (10% EtOAc in Hex), the reaction was concentrated under reduced pressure to give a light yellow oil. This crude mixture was diluted with EtOAc (25 mL) then washed 3 x with 1 N HCl (20 mL). The organic layer was washed with brine, dried over sodium sulfate, and filtered to give a crude, colorless oil. Purification by flash column chromatography (0 to 5% EtOAc in Hex elution gradient) provided the title substrate as a clear, colorless oil (219 mg, 87%).

**<sup>1</sup>H NMR** (400 MHz, CDCl<sub>3</sub>): δ = 7.33 (d, *J* = 8.7 Hz, 2H), 6.86 (d, *J* = 8.7 Hz, 2H), 6.60 (d, *J* = 15.9 Hz, 1H), 6.15 (dt, *J* = 15.8, 6.6 Hz, 1H), 4.70 (d, *J* = 6.6 Hz, 2H), 3.81 (s, 3H), 2.09 (s, 3H) ppm

**<sup>13</sup>C NMR** (176 MHz, CDCl<sub>3</sub>) δ = 170.9, 159.5, 134.0, 128.9, 127.8, 120.8, 113.9, 65.3, 55.3, 21.0 ppm

**R<sub>f</sub>** (1:10 – EtOAc:Hex) = 0.7

**IR** (*neat*): 2938, 1733, 1607, 1362, 1222, 1174, 1023, 958, 842 cm<sup>-1</sup>

**HRMS** (EI) *m/z* calculated for C<sub>12</sub>H<sub>14</sub>O<sub>3</sub> [M]<sup>+</sup> 206.0943, found 206.0951.

<sup>1</sup>H NMR (400 MHz, CDCl<sub>3</sub>) for S19

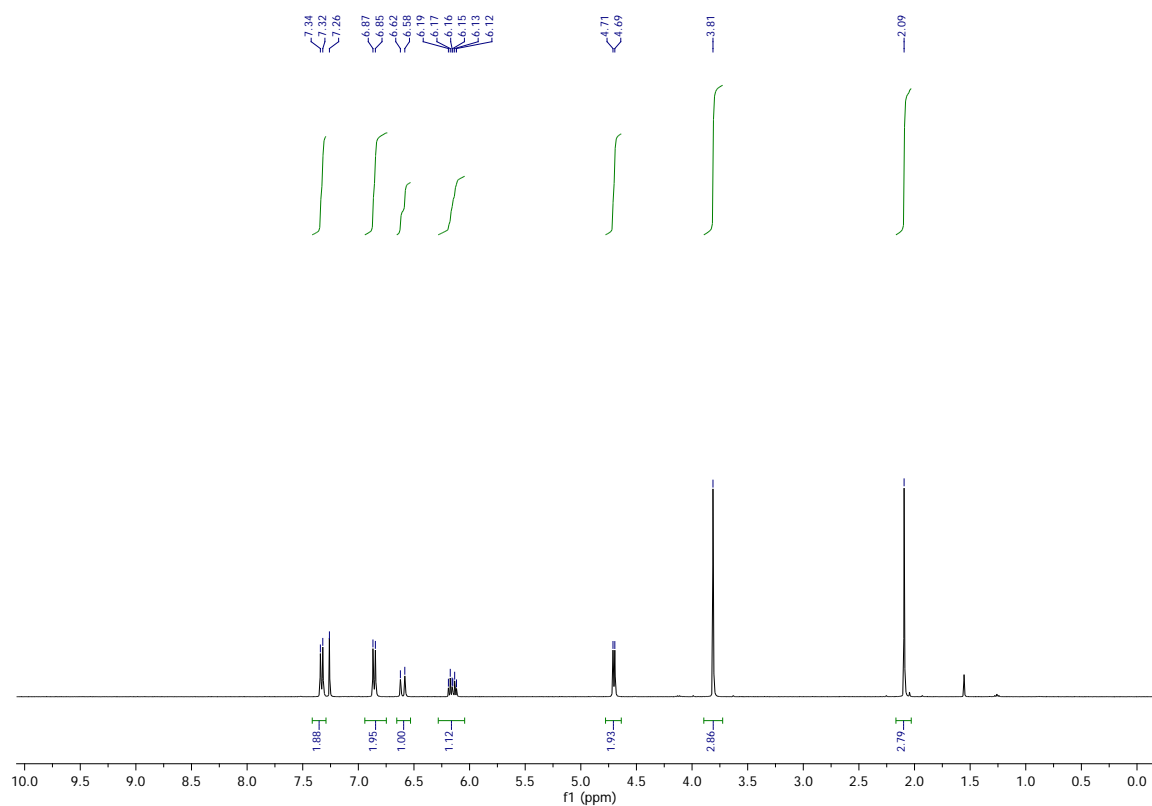

<sup>13</sup>C NMR (700 MHz, CDCl<sub>3</sub>) for S19

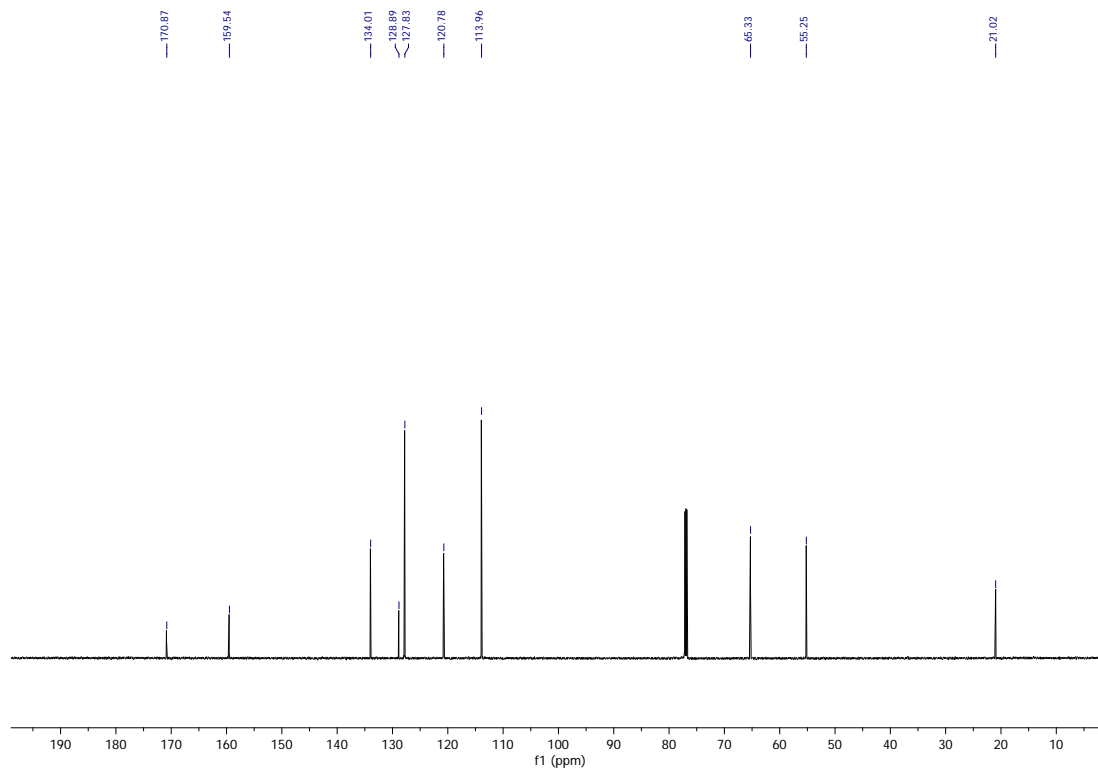

### **7-methoxy-1,2-dihydronaphthalene (S20)**

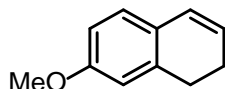

A solution of 6-methoxytetralin-1-one (1000 mg, 5.67 mmol) in diethyl ether (17 mL) was added to a suspension of  $\text{LiAlH}_4$  (108 mg, 2.84 mmol) in diethyl ether (8.5 mL). The temperature of the reaction as kept below 5 °C during this addition. The addition process took, 30 minutes, and the reaction was allowed to stir for 30 more minutes to reach completion. The reaction was quenched by the addition of 220  $\mu\text{L}$  of a 3M NaOH solution at 0 °C, followed by 600  $\mu\text{L}$  of water. The solution was then gravity filtered to remove the aluminum salts, and then washed with 30 mL of water, followed by 30 mL of saturated sodium chloride solution. Drying over magnesium sulfate and concentration yielded a clear liquid.

The crude alcohol was dissolved in toluene (30 mL, 0.2 M), and 4-methylbenzenesulfonic acid;hydrate (6.75 mg, 0.0355 mmol) was added. The reaction was heated to reflux for no longer than 30 minutes, and then cooled to room temperature. The mixture was washed with 30 mL of water followed by 30 mL of saturated sodium chloride solution, followed by drying over magnesium sulfate. Vacuum filtration with additional washing with ethyl acetate removed the dessicant, while azeotropic distillation of the toluene with ethyl acetate afforded a brown oil free of toluene. The brown oil was distilled to yield under vacuum at 0.2 mbar/80 °C afforded 7-methoxy-1,2-dihydronaphthalene (275 mg, 1.72 mmol, yield: 30%). Spectral data of the product corresponded with previous reports (51).

**Aminoarylation Products:**

**N-(2-(4-methoxyphenyl)-2-(naphthalen-1-yl)ethyl)acetamide (4)**

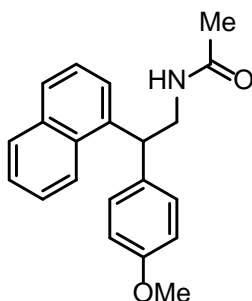

The **General Procedure A** was followed performing the reaction with *N*-(1-naphthylsulfonyl)acetamide (75 mg, 0.3 mmol) and 1-methoxy-4-vinyl-benzene (48  $\mu$ L, 0.36 mmol) and purification by flash column chromatography ( $\text{SiO}_2$ , 90:10 $\rightarrow$ 30:70 Hex:EtOAc) to furnish the title compound as a white foam (39 mg, 41%).

**$^1\text{H NMR}$**  (700 MHz,  $\text{CDCl}_3$ ):  $\delta$  = 8.13 (d,  $J$  = 8.1 Hz, 1H), 7.88 – 7.81 (m, 1H), 7.77 (d,  $J$  = 8.1 Hz, 1H), 7.51 – 7.43 (m, 3H), 7.39 (d,  $J$  = 7.1 Hz, 1H), 7.19 (d,  $J$  = 8.6 Hz, 2H), 6.83 (d,  $J$  = 8.6 Hz, 2H), 5.53 (bs, 1H), 4.96 (t,  $J$  = 7.7 Hz, 2H), 4.03 (ddd,  $J$  = 13.6, 7.5, 6.0 Hz, 1H), 3.97 – 3.86 (m, 1H), 3.76 (s, 3H), 1.88 (s, 3H) ppm

**$^{13}\text{C NMR}$**  (176 MHz,  $\text{CDCl}_3$ ):  $\delta$  = 170.1, 158.3, 137.5, 134.1, 133.9, 131.9, 129.1, 128.8, 127.6, 126.3, 125.7, 125.3, 124.2, 123.7, 114.1, 55.2, 45.1, 44.1, 23.3 ppm

$R_f$  (5:5 – EtOAc:Hex) = 0.1

**IR** (*neat*): 2929, 1648, 1547, 1510, 1260, 1240, 1140, 1025, 781  $\text{cm}^{-1}$

**HRMS** (ESI)  $m/z$  calculated for  $\text{C}_{21}\text{H}_{21}\text{NO}_2$   $[\text{M}+\text{H}]^+$  320.1645, found 320.1645.



<sup>1</sup>H NMR (700 MHz, CDCl<sub>3</sub>) for 4

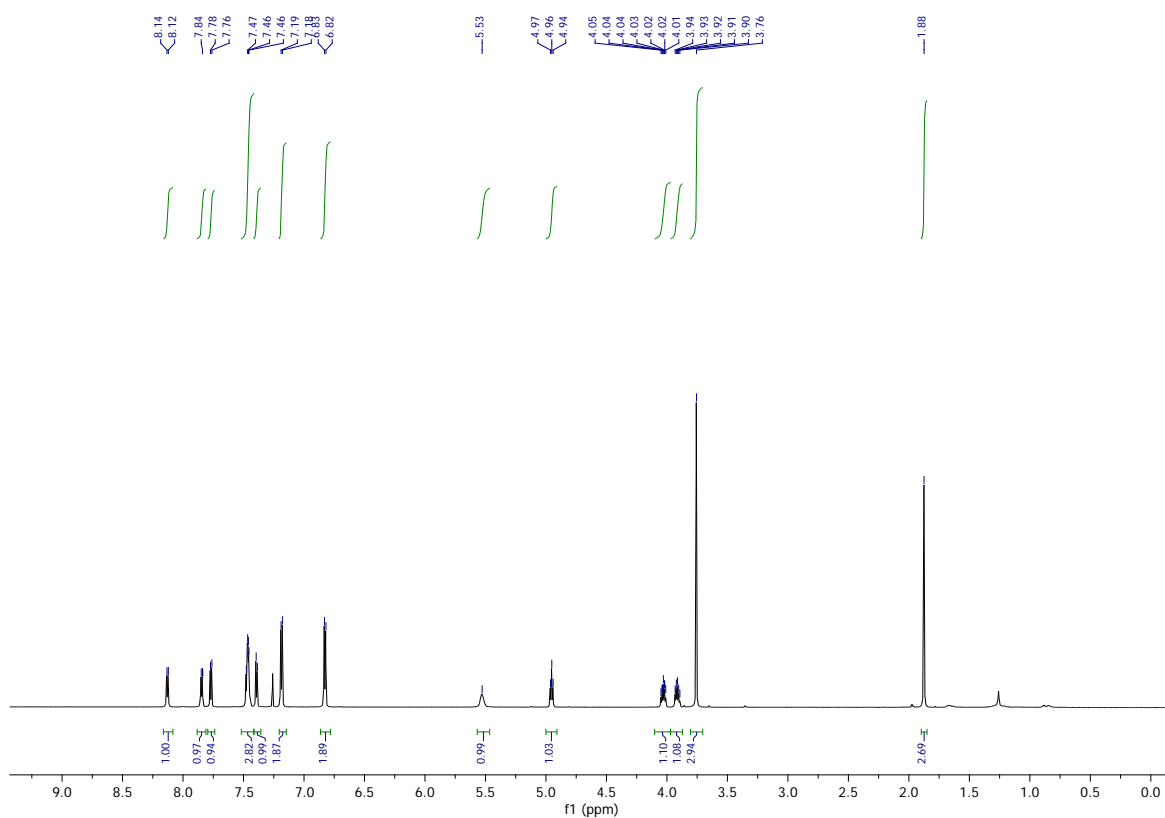

<sup>13</sup>C NMR (176 MHz, CDCl<sub>3</sub>) for 4

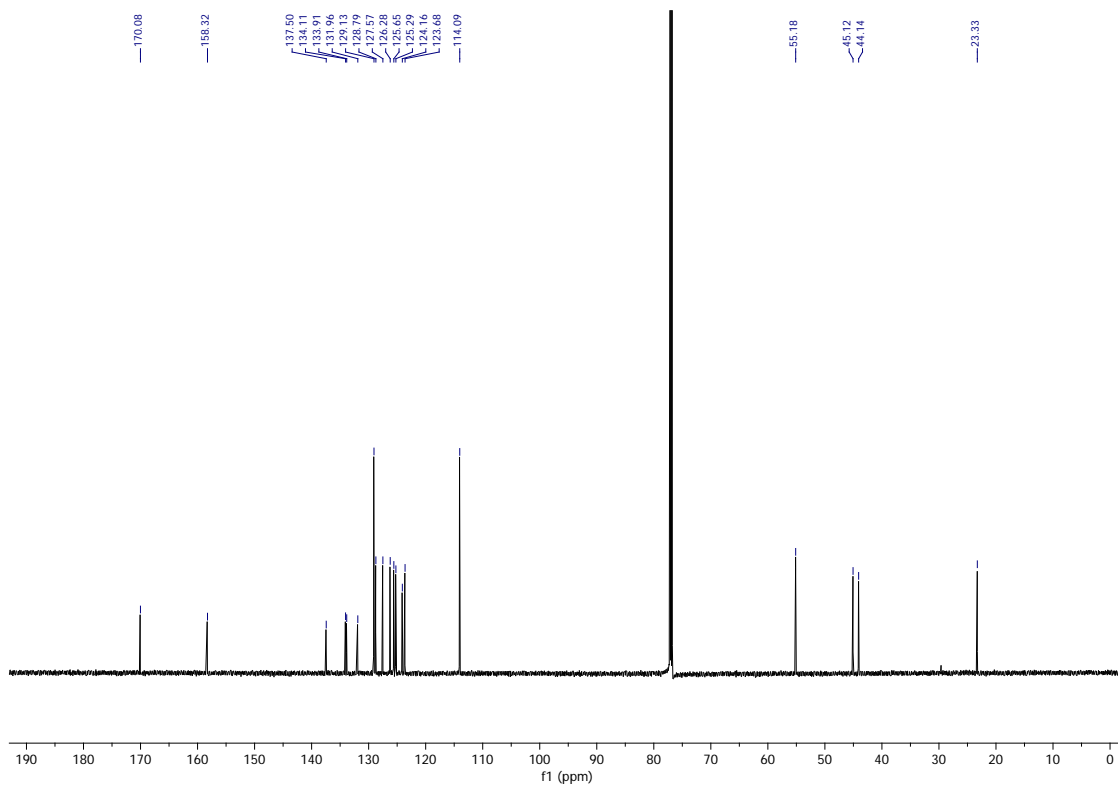

**ethyl-(2-(4-methoxyphenyl)-2-(naphthalen-1-yl)ethyl)carbamate (5)**

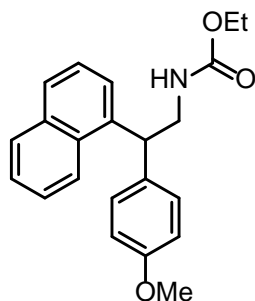

The **General Procedure A** was followed performing the reaction with ethyl-*N*-(1-naphthylsulfonyl)carbamate (251 mg, 0.9 mmol) and 1-methoxy-4-vinyl-benzene (40  $\mu$ L, 0.3 mmol) and purification by flash column chromatography (SiO<sub>2</sub>, 90:10 $\rightarrow$ 30:70 Hex:EtOAc) to furnish the title compound as a light yellow foam (38 mg, 36%).

**<sup>1</sup>H NMR** (500 MHz, CDCl<sub>3</sub>):  $\delta$  = 8.12 (d,  $J$  = 6.9 Hz, 1H), 7.84 (d,  $J$  = 8.5 Hz, 1H), 7.76 (d,  $J$  = 8.1 Hz, 1H), 7.46 (m, 3H), 7.38 (d,  $J$  = 7.0 Hz, 1H), 7.19 (d,  $J$  = 8.5 Hz, 2H), 6.83 (d,  $J$  = 8.6 Hz, 2H), 4.95 (bs, 1H), 4.73 (bs, 1H), 4.09 (m, 2H), 3.96 (dd,  $J$  = 13.4, 6.3 Hz, 1H), 3.90 – 3.79 (m, 1H), 1.19 (t,  $J$  = 6.5 Hz, 3H) ppm

**<sup>13</sup>C NMR** (176 MHz, CDCl<sub>3</sub>):  $\delta$  = 158.3, 156.5, 137.5, 134.1, 133.9, 131.9, 129.2, 128.8, 127.6, 126.3, 125.6, 125.3, 124.1, 123.7, 114.1, 60.8, 55.2, 45.7, 45.5, 14.6 ppm

**R<sub>f</sub>** (5:5 – EtOAc:Hex) = 0.1

**IR** (*neat*): 2931, 1693, 1609, 1509, 1244, 1177, 1032, 799, 729 cm<sup>-1</sup>

**HRMS** (ESI+)  $m/z$  calculated for C<sub>22</sub>H<sub>23</sub>NO<sub>3</sub> [M+H]<sup>+</sup> 350.1751, found 350.1747.

<sup>1</sup>H NMR (500 MHz, CDCl<sub>3</sub>) for 5

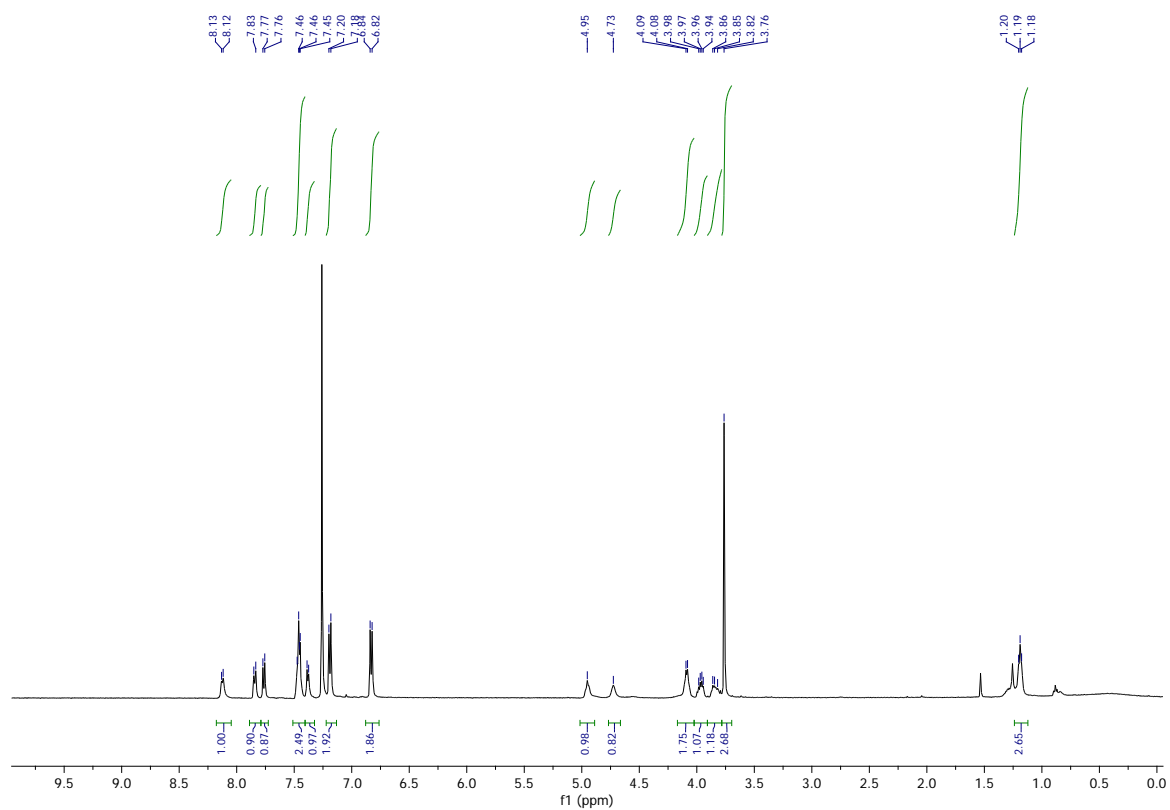

<sup>13</sup>C NMR (176 MHz, CDCl<sub>3</sub>) for 5

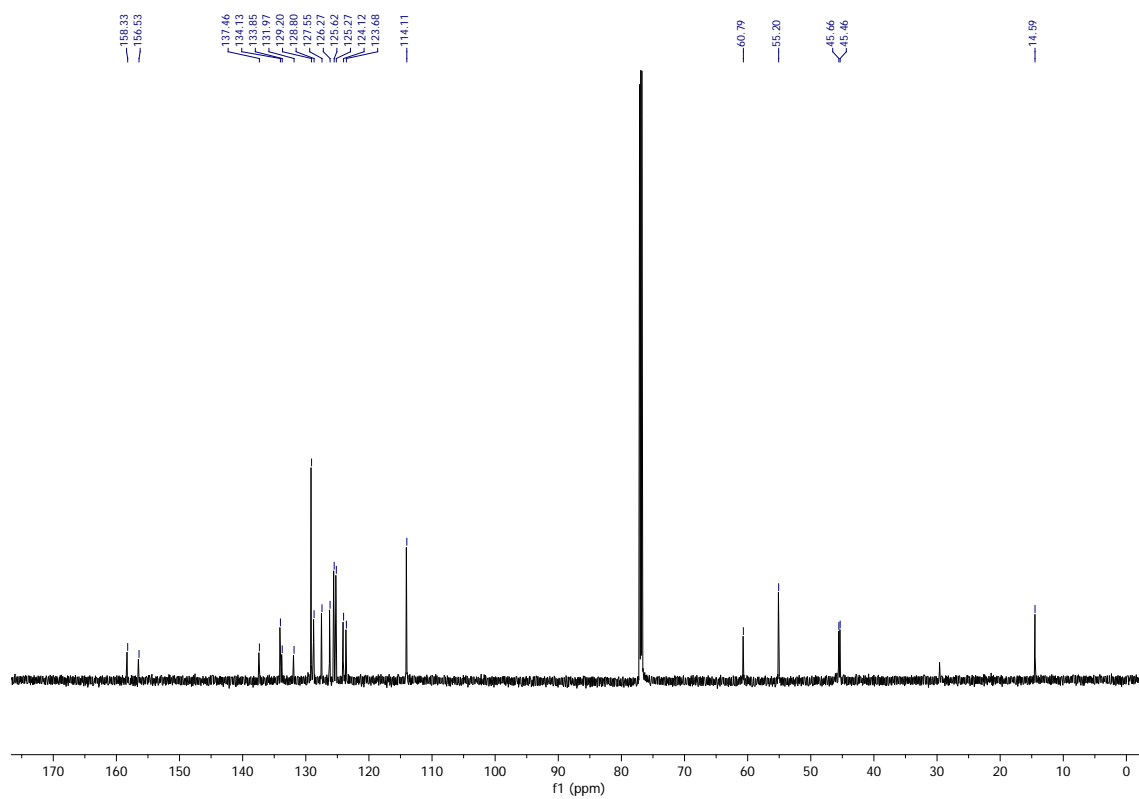

**tert-butyl-(2-(4-methoxyphenyl)-2-(naphthalen-1-yl)ethyl)carbamate (6)**

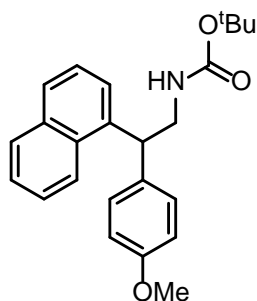

The **General Procedure A** was followed performing the reaction with *t*-butyl-*N*-(1-naphthylsulfonyl)carbamate (277 mg, 0.9 mmol) and 1-methoxy-4-vinyl-benzene (40  $\mu$ L, 0.3 mmol) and purification by flash column chromatography (SiO<sub>2</sub>, 90:10→30:70 Hex:EtOAc) to furnish the title compound as a white foam (30 mg, 27%).

**<sup>1</sup>H NMR** (700 MHz, CDCl<sub>3</sub>):  $\delta$  = 8.10 (d,  $J$  = 7.9 Hz, 1H), 7.84 (d,  $J$  = 8.0 Hz, 1H), 7.77 (d,  $J$  = 8.1 Hz, 1H), 7.50 – 7.44 (m, 3H), 7.42 (d,  $J$  = 6.6 Hz, 1H), 7.18 (d,  $J$  = 8.6 Hz, 2H), 6.82 (d,  $J$  = 8.3 Hz, 2H), 4.93 (t,  $J$  = 7.0 Hz, 1H), 4.62 (s, 1H), 3.89 (dd,  $J$  = 13.3, 6.3 Hz, 1H), 3.84 (dd,  $J$  = 12.9, 6.2 Hz, 1H), 3.76 (s, 3H), 1.41 (s, 9H) ppm

**<sup>13</sup>C NMR** (176 MHz, CDCl<sub>3</sub>):  $\delta$  = 158.2, 155.8, 137.6, 134.1, 132.1, 129.2, 128.8, 127.5, 126.2, 125.6, 125.3, 124.1, 123.7, 114.0, 79.3, 55.2, 45.7, 45.2, 29.7, 28.4 ppm

**R<sub>f</sub>** (5:5 – EtOAc:Hex) = 0.1

**IR** (*neat*): 2975, 1696, 1508, 1365, 1245, 1161, 1035, 799, 780 cm<sup>-1</sup>

**HRMS** (ESI+)  $m/z$  calculated for C<sub>24</sub>H<sub>27</sub>NO<sub>3</sub> [M+H]<sup>+</sup> 378.2064, found 378.2049.

<sup>1</sup>H NMR (700 MHz, CDCl<sub>3</sub>) for 6

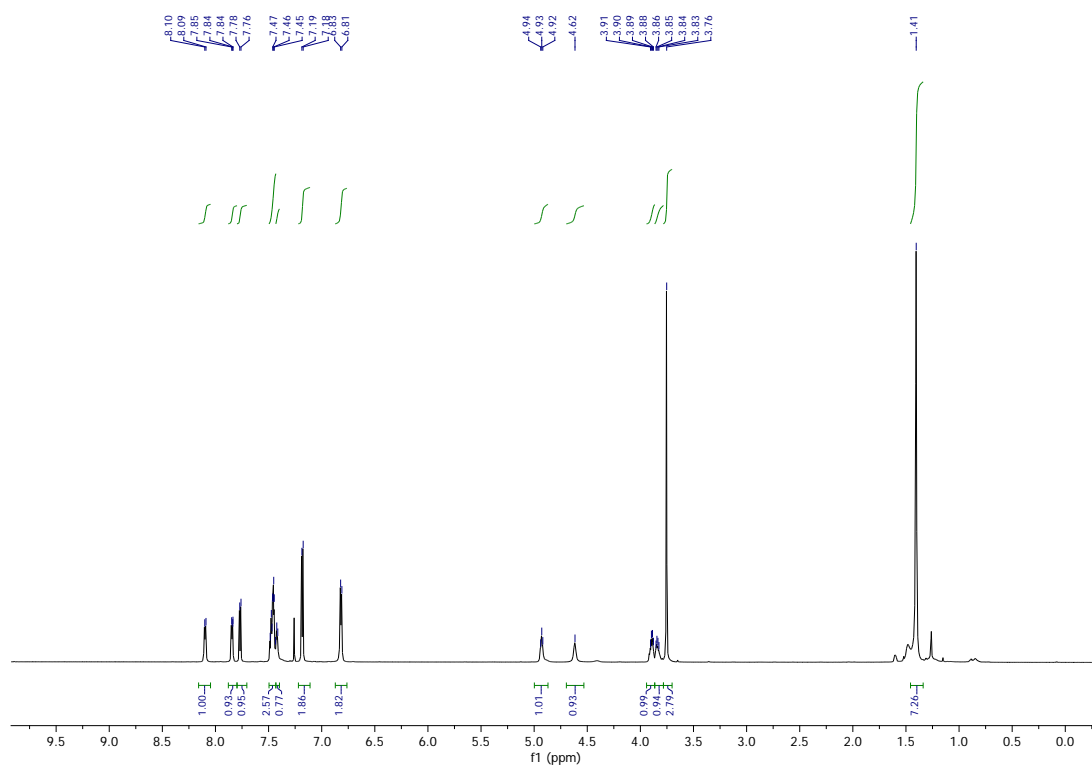

<sup>13</sup>C NMR (176 MHz, CDCl<sub>3</sub>) for 6

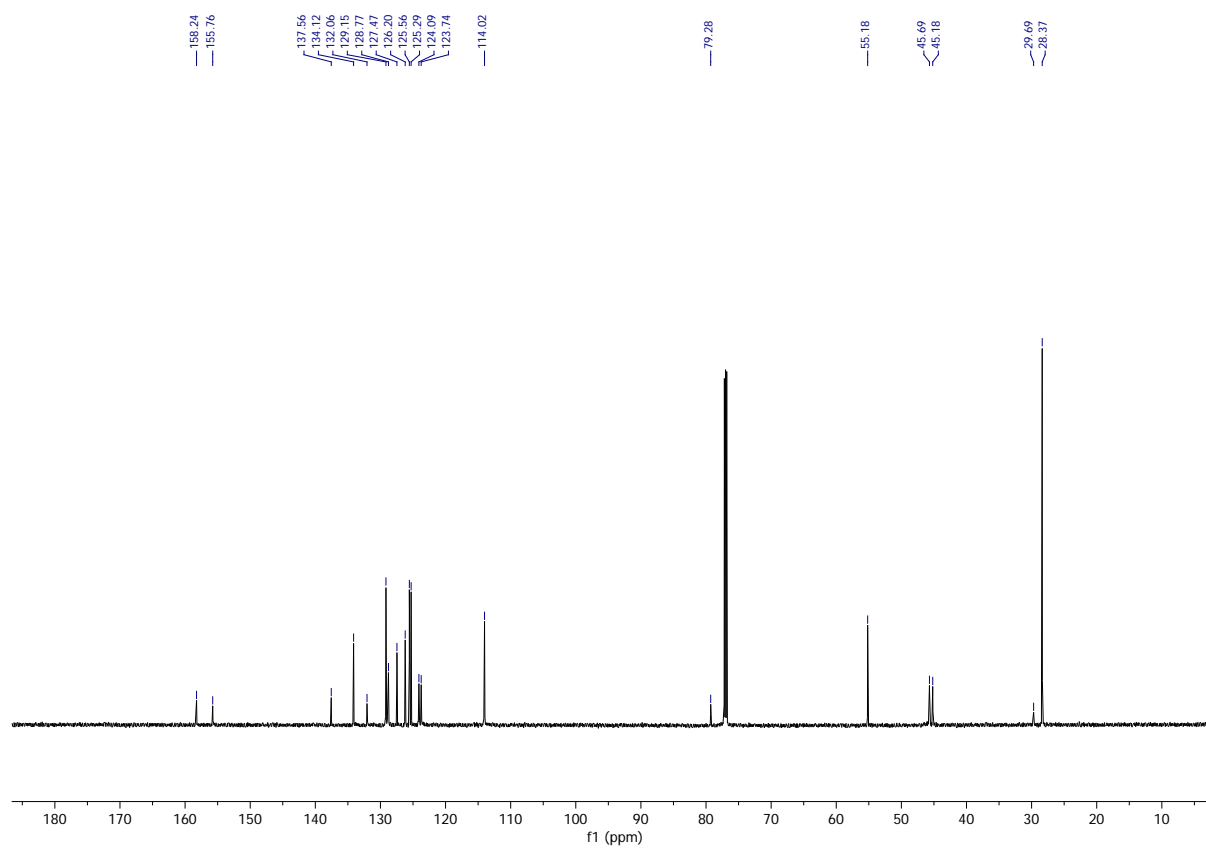

**tert-butyl-1-(4-methoxyphenyl)-1-(naphthalen-1-yl)propan-2-yl)carbamate (8)**

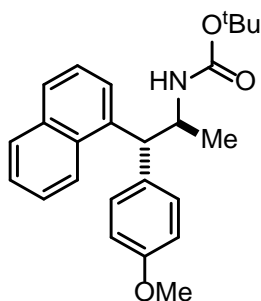

The **General Procedure A** was followed performing the reaction with *t*-butyl- *N*-(1-naphthylsulfonyl)carbamate (277 mg, 0.9 mmol) and *trans*-anethole (45  $\mu$ L, 0.3 mmol) and purification by flash column chromatography (SiO<sub>2</sub>, 90:10→30:70 Hex:EtOAc) to furnish the title compound as a white foam (43 mg, 37%).

**<sup>1</sup>H NMR** (700 MHz, CDCl<sub>3</sub>):  $\delta$  = 8.13 (d, *J* = 8.3 Hz, 1H), 7.82 (d, *J* = 7.9 Hz, 1H), 7.72 (d, *J* = 7.8 Hz, 2H), 7.50 (t, *J* = 7.6 Hz, 1H), 7.46 (t, *J* = 7.4 Hz, 1H), 7.42 (t, *J* = 7.3 Hz, 1H), 7.26 (d, *J* = 7.6 Hz, 2H), 6.78 (d, *J* = 8.2 Hz, 2H), 4.61 (s, 1H), 4.56 (d, *J* = 9.9 Hz, 1H), 4.33 (s, 1H), 3.72 (s, 3H), 1.33 (s, 9H), 1.18 (d, *J* = 5.7 Hz, 3H) ppm

**<sup>13</sup>C NMR** (176 MHz, CDCl<sub>3</sub>):  $\delta$  = 158.1, 155.3, 137.5, 134.1, 132.0, 129.4, 128.9, 127.1, 125.9, 125.5, 125.2, 124.4, 123.3, 114.3, 113.9, 79.1, 55.1, 52.2, 49.3, 28.3, 21.1 ppm

**R<sub>f</sub>** (5:5 – EtOAc:Hex) = 0.1

**IR** (*neat*): 2974, 2831, 1689, 1609 1509, 1452, 1365, 1247, 1162, 929, 782 cm<sup>-1</sup>

**HRMS** (ESI+) *m/z* calculated for C<sub>25</sub>H<sub>29</sub>NO<sub>3</sub> [M+H]<sup>+</sup> 392.2220, found 392.2230.

<sup>1</sup>H NMR (700 MHz, CDCl<sub>3</sub>) for 8

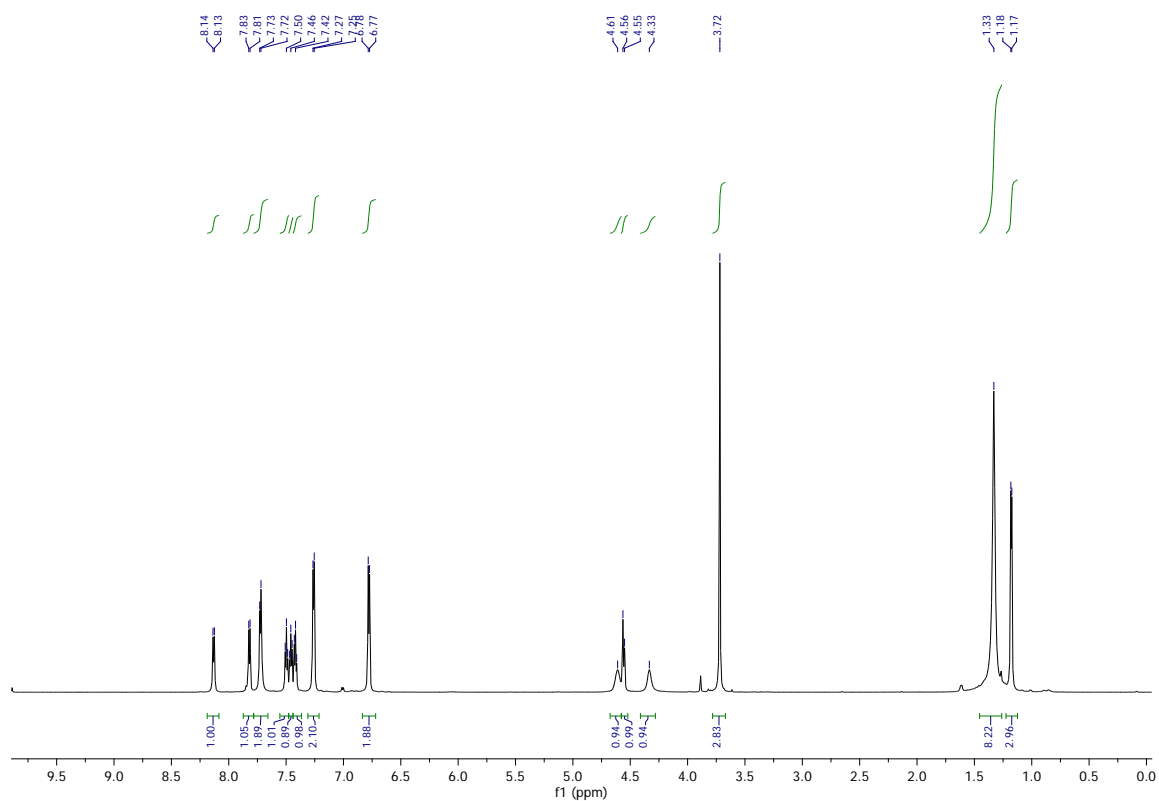

<sup>13</sup>C NMR (176 MHz, CDCl<sub>3</sub>) for 8

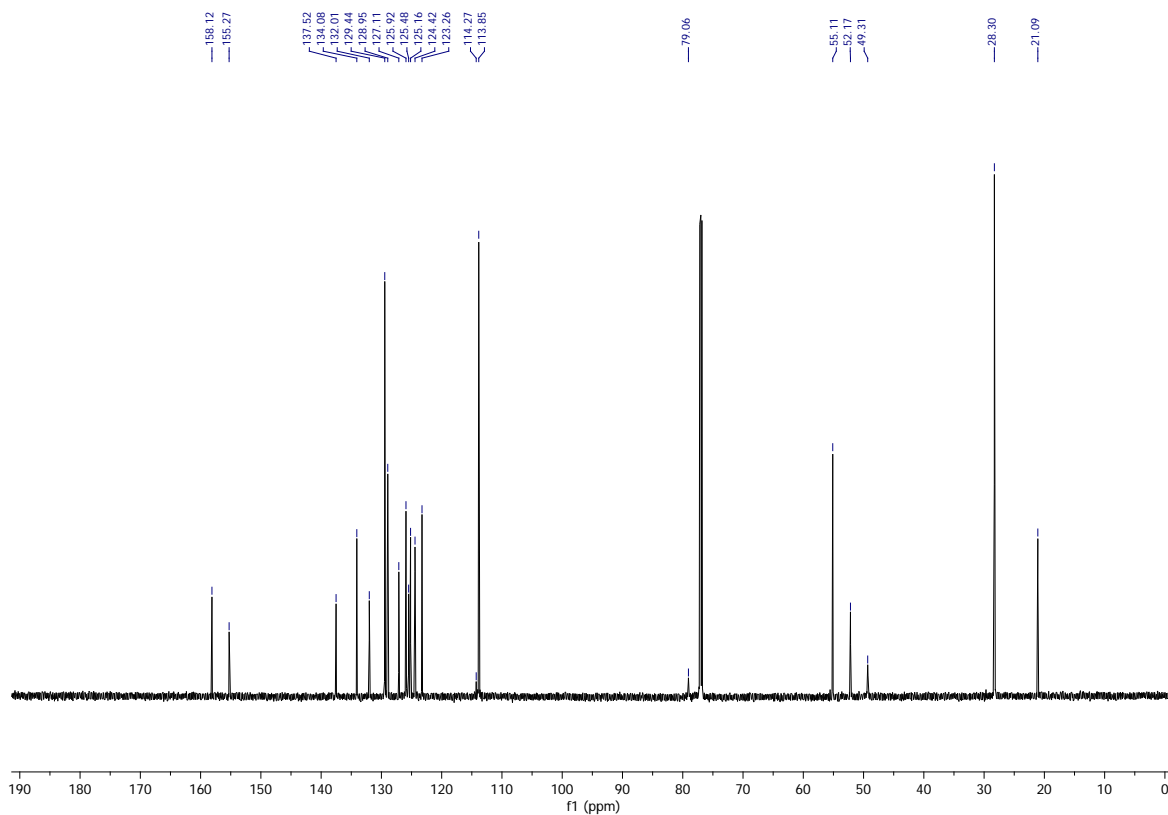

**N-1-(4-methoxyphenyl)-1-(naphthalen-1-yl)propan-2-yl)acetamide (9)**

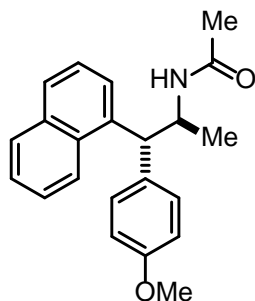

**With *trans*-Anethole:** The **General Procedure A** was followed performing the reaction with *N*-(1-naphthylsulfonyl)acetamide (75 mg, 0.3 mmol) and *trans*-anethole (54  $\mu$ L, 0.36 mmol) and purification by flash column chromatography (SiO<sub>2</sub>, 90:10 $\rightarrow$ 30:70 Hex:EtOAc) to furnish the title compound as a light yellow foam (82 mg, 82%).

**With *cis*-Anethole:** The **General Procedure A** was followed performing the reaction with *N*-(1-naphthylsulfonyl)acetamide (75 mg, 0.3 mmol) and *cis*-anethole (54  $\mu$ L, 0.36 mmol) and purification by flash column chromatography (SiO<sub>2</sub>, 90:10 $\rightarrow$ 30:70 Hex:EtOAc) to furnish the title compound as a light yellow foam (72 mg, 72%).

**<sup>1</sup>H NMR** (700 MHz, CDCl<sub>3</sub>):  $\delta$  = 8.14 (d,  $J$  = 8.5 Hz, 1H), 7.82 (d,  $J$  = 8.0 Hz, 1H), 7.73 (d,  $J$  = 8.2 Hz, 1H), 7.66 (d,  $J$  = 7.2 Hz, 1H), 7.50 (t,  $J$  = 7.7 Hz, 1H), 7.47 (td,  $J$  = 8.1, 7.1 Hz, 1H), 7.43 (t,  $J$  = 7.4 Hz, 1H), 7.25 (d,  $J$  = 8.5 Hz, 2H), 6.78 (d,  $J$  = 8.6 Hz, 2H), 5.22 (d,  $J$  = 7.8 Hz, 1H), 5.01 – 4.87 (m, 1H), 4.58 (d,  $J$  = 10.4 Hz, 1H), 3.72 (s, 3H), 1.74 (s, 3H), 1.17 (d,  $J$  = 6.3 Hz, 3H) ppm

**<sup>13</sup>C NMR** (176 MHz, CDCl<sub>3</sub>):  $\delta$  = 169.4, 158.2, 137.1, 134.1, 133.7, 131.9, 129.5, 129.1, 127.3, 126.0, 125.6, 125.3, 124.2, 123.2, 113.9, 55.1, 51.9, 48.1, 23.4, 20.7 ppm

R<sub>f</sub> (5:5 – EtOAc:Hex) = 0.1

**IR** (*neat*): 3089, 2929, 1637, 1509, 1370, 1302, 1249, 1177, 1031 cm<sup>-1</sup>

**HRMS** (ESI+)  $m/z$  calculated for C<sub>22</sub>H<sub>23</sub>NO<sub>2</sub> [M+H]<sup>+</sup> 334.1802, found 334.1802.



<sup>1</sup>H NMR (700 MHz, CDCl<sub>3</sub>) for 9

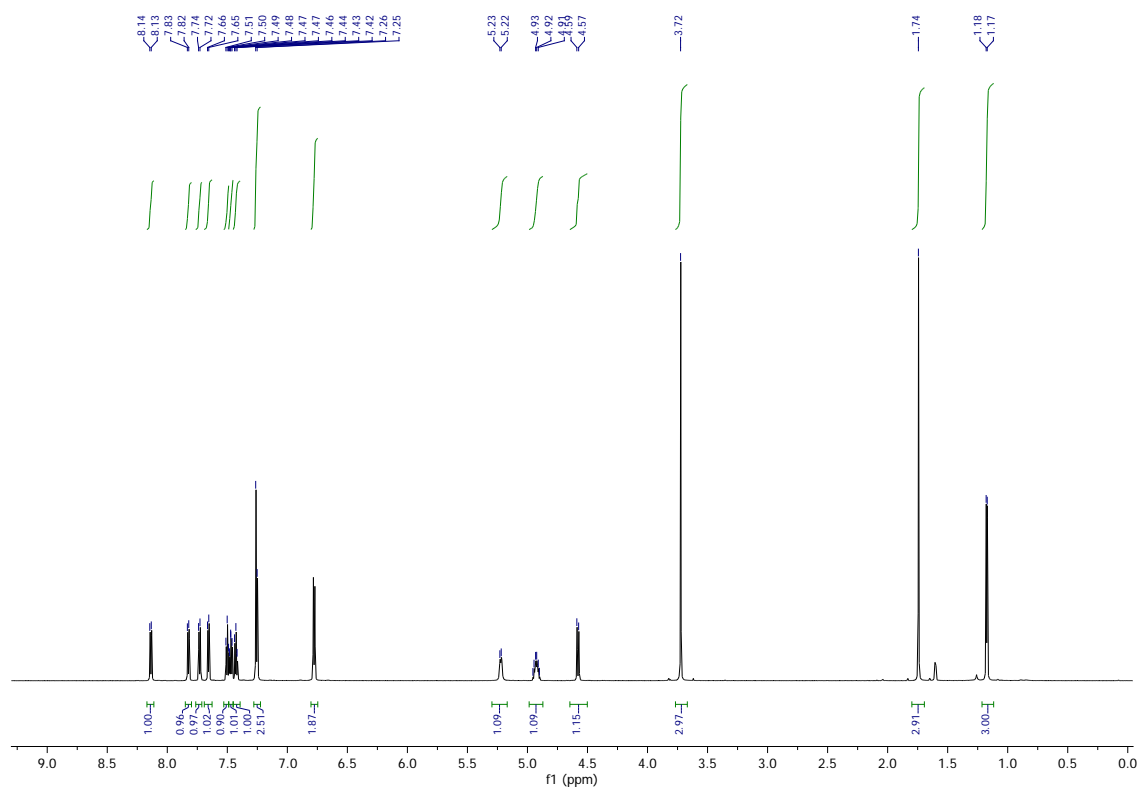

<sup>13</sup>C NMR (176 MHz, CDCl<sub>3</sub>) for 9

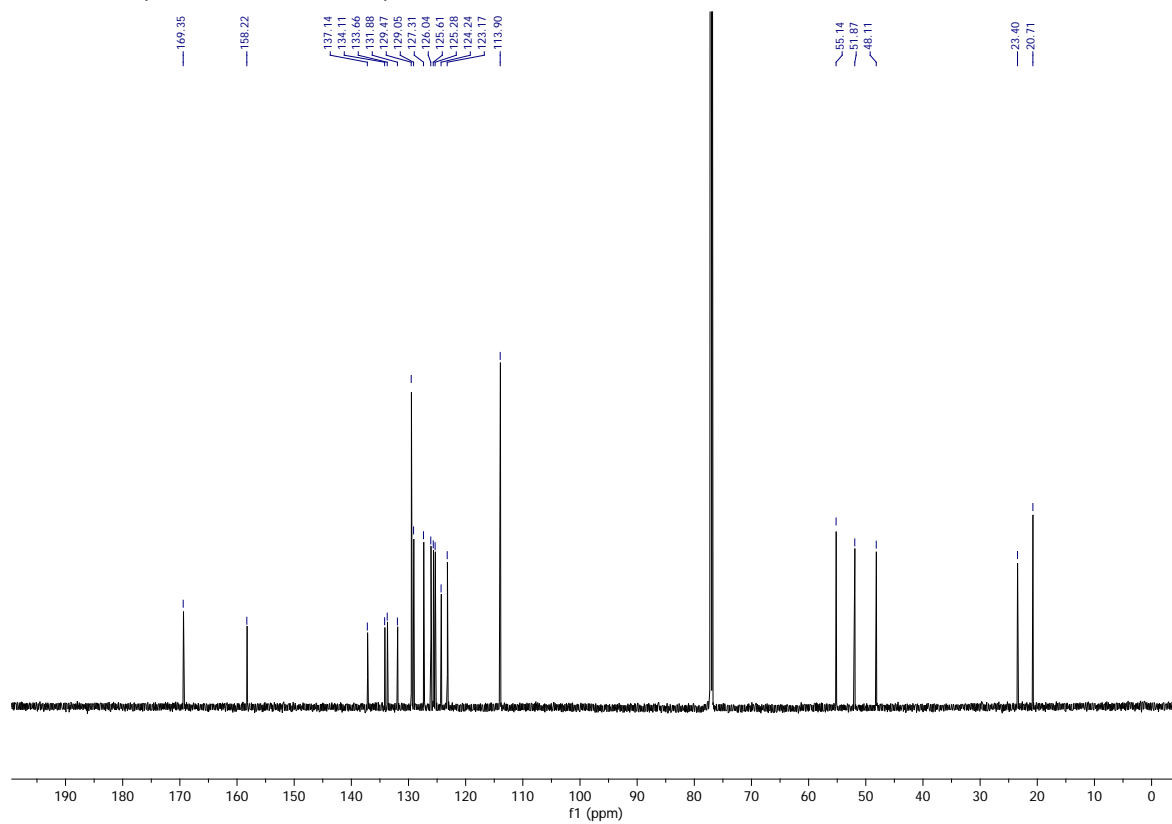

**N-1-(4-methoxyphenyl)-1-(naphthalen-2-yl)propan-2-yl)-*n*-pentamide (10)**

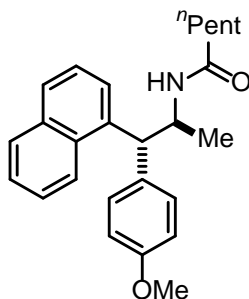

The **General Procedure A** was followed performing the reaction on 0.2 mmol scale with *N*-(1-naphthylsulfonyl)hexanamide and *trans*-anethole (59.3 mg, 0.400 mmol). Purification by flash column chromatography (SiO<sub>2</sub>, 90:10 to 60:40 Hex:EtOAc) to furnish the title compound as a light yellow foam (45%). Further removal of residual *N*-(1-naphthylsulfonyl)hexanamide (~10%) was done by washing with 1 N NaOH and extracting into Et<sub>2</sub>O. Reconcentration of the purified product provided a light yellow foam (20.7 mg, 25%).

**<sup>1</sup>H NMR** (400 MHz, CDCl<sub>3</sub>) = δ 8.16 (d, J = 8.3 Hz, 1H), 7.83 (d, J = 8.0 Hz, 1H), 7.73 (d, J = 8.2 Hz, 1H), 7.66 (d, J = 7.2 Hz, 1H), 7.49 (t, J = 7.7 Hz, 2H), 7.46 – 7.38 (t, 8.0 Hz, 1H), 7.28 (d, J = 8.0 Hz, 2H), 6.79 (d, J = 8.5 Hz, 2H), 5.20 (d, J = 8.6 Hz, 1H), 4.95 (m, 1H), 4.60 (d, J = 10.5 Hz, 1H), 3.73 (s, 3H), 1.90 (dtd, J = 29.3, 14.5, 7.5 Hz, 2H), 1.47 – 0.86 (m, 9H), 0.78 (t, J = 7.2 Hz, 2H) ppm

**<sup>13</sup>C NMR** (100 MHz, CDCl<sub>3</sub>) = 172.4, 158.2, 137.3, 134.1, 133.8, 131.9, 129.5, 129.1, 127.3, 126.0, 125.6, 125.2, 124.5, 123.1, 113.9, 55.1, 51.9, 48.0, 36.9, 31.2, 25.3, 22.3, 20.8, 13.8 ppm

**R<sub>f</sub>** (4:6 – EtOAc:Hex) = 0.5

**IR** (*neat*) = 2996, 2932, 2253, 1641, 1510, 1252, 905, 784, 729, 649 cm<sup>-1</sup>

**HRMS** (ESI+) *m/z* calculated for C<sub>26</sub>H<sub>31</sub>NO<sub>2</sub> [M=H<sup>+</sup>] 390.2428, found 390.2431.

$^1\text{H}$  NMR (400 MHz,  $\text{CDCl}_3$ ) of 10

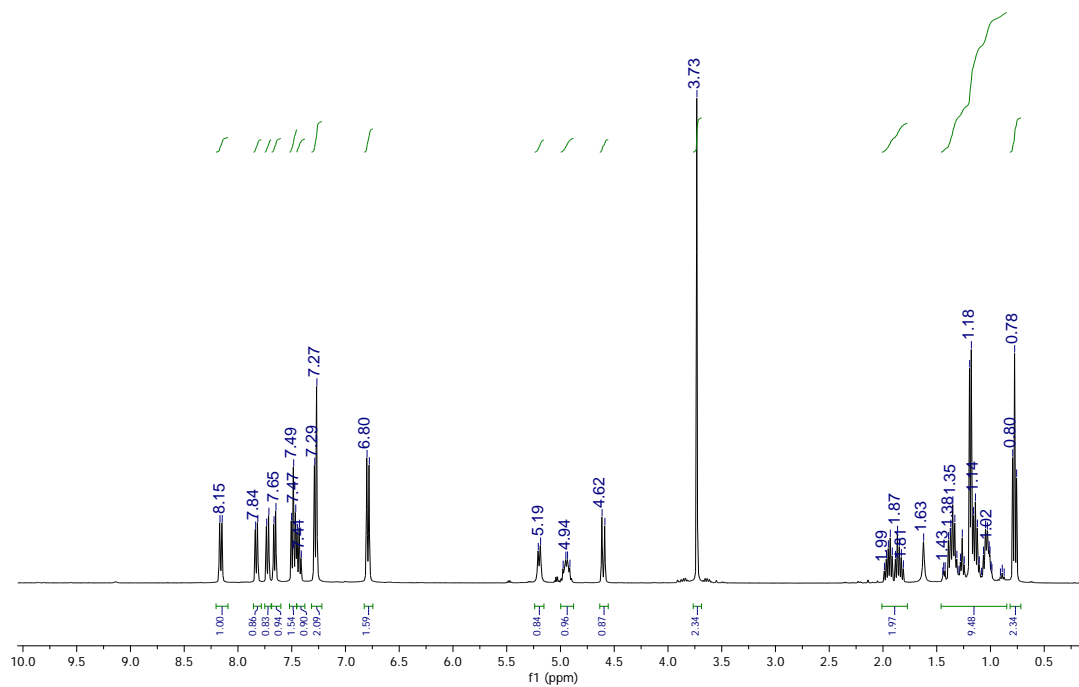

$^{13}\text{C}$  NMR (100 MHz,  $\text{CDCl}_3$ ) for 10

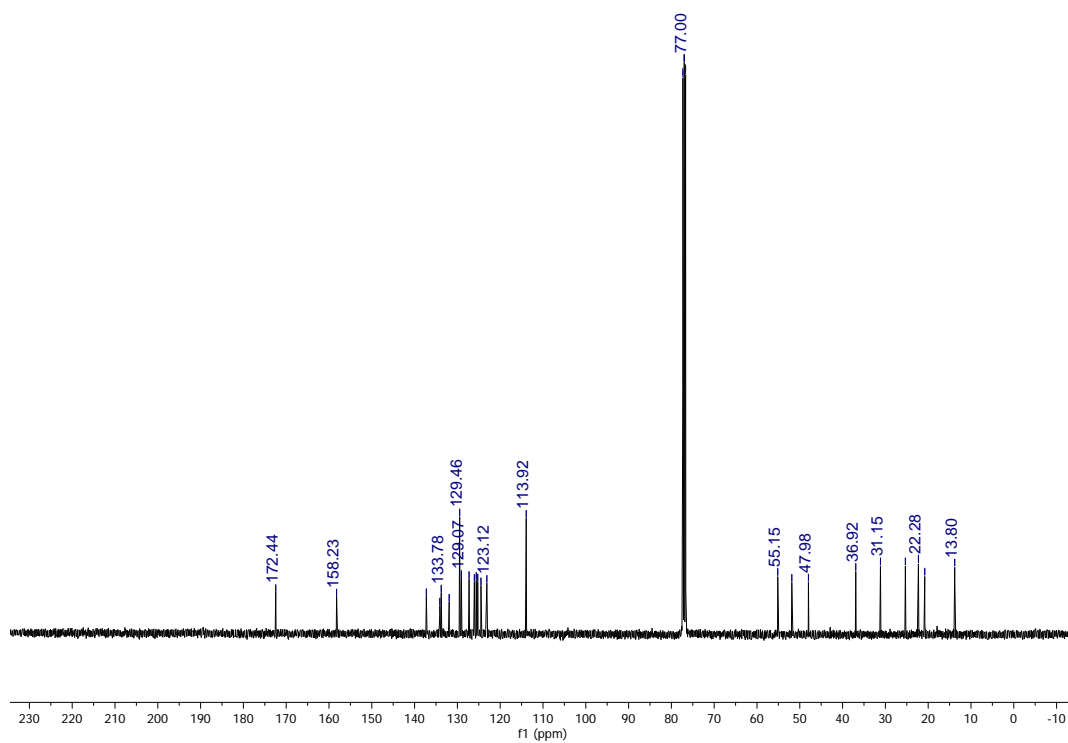

**N-1-(4-methoxyphenyl)-1-(naphthalen-2-yl)propan-2-yl)acetamide (11)**

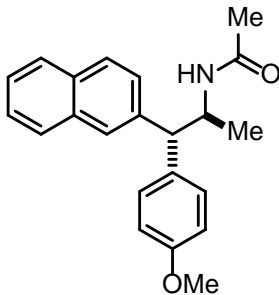

The **General Procedure A** was followed performing the reaction with *N*-(2-naphthylsulfonyl)acetamide (75 mg, 0.3 mmol) and *trans*-anethole (54  $\mu$ L, 0.36 mmol) and purification by flash column chromatography (SiO<sub>2</sub>, 90:10→30:70 Hex:EtOAc) to furnish the title compound as a light yellow foam (78 mg, 78%).

**<sup>1</sup>H NMR** (700 MHz, CDCl<sub>3</sub>):  $\delta$  = 7.79 (d,  $J$  = 8.0 Hz, 1H), 7.77 (d,  $J$  = 7.9 Hz, 1H), 7.75 (d,  $J$  = 8.6 Hz, 1H), 7.73 (m, 1H), 7.45 (td,  $J$  = 11.0, 3.9 Hz, 1H), 7.42 (t,  $J$  = 6.9 Hz, 1H), 7.38 (dd,  $J$  = 8.5, 1.2 Hz, 1H), 7.23 (d,  $J$  = 8.6 Hz, 2H), 6.82 (d,  $J$  = 8.7 Hz, 2H), 5.22 (d,  $J$  = 8.4 Hz, 1H), 5.01 – 4.87 (m, 1H), 3.97 (d,  $J$  = 9.7 Hz, 1H), 3.76 (s, 3H), 1.77 (s, 3H), 1.17 (d,  $J$  = 6.4 Hz, 3H) ppm

**<sup>13</sup>C NMR** (176 MHz, CDCl<sub>3</sub>):  $\delta$  = 169.3, 158.3, 139.6, 134.2, 133.4, 132.2, 129.3, 128.3, 127.8, 127.5, 126.5, 126.4, 126.1, 125.6, 114.1, 57.2, 55.2, 47.5, 23.5, 20.3 ppm

**R<sub>f</sub>** (5:5 – EtOAc:Hex) = 0.1

**IR** (*neat*): 3268, 2971, 1636, 1509, 1371, 1247, 1178, 1032, 915 cm<sup>-1</sup>

**HRMS** (ESI+)  $m/z$  calculated for C<sub>22</sub>H<sub>23</sub>NO<sub>2</sub> [M+H]<sup>+</sup> 334.1802, found 334.1805.

<sup>1</sup>H NMR (700 MHz, CDCl<sub>3</sub>) for 11

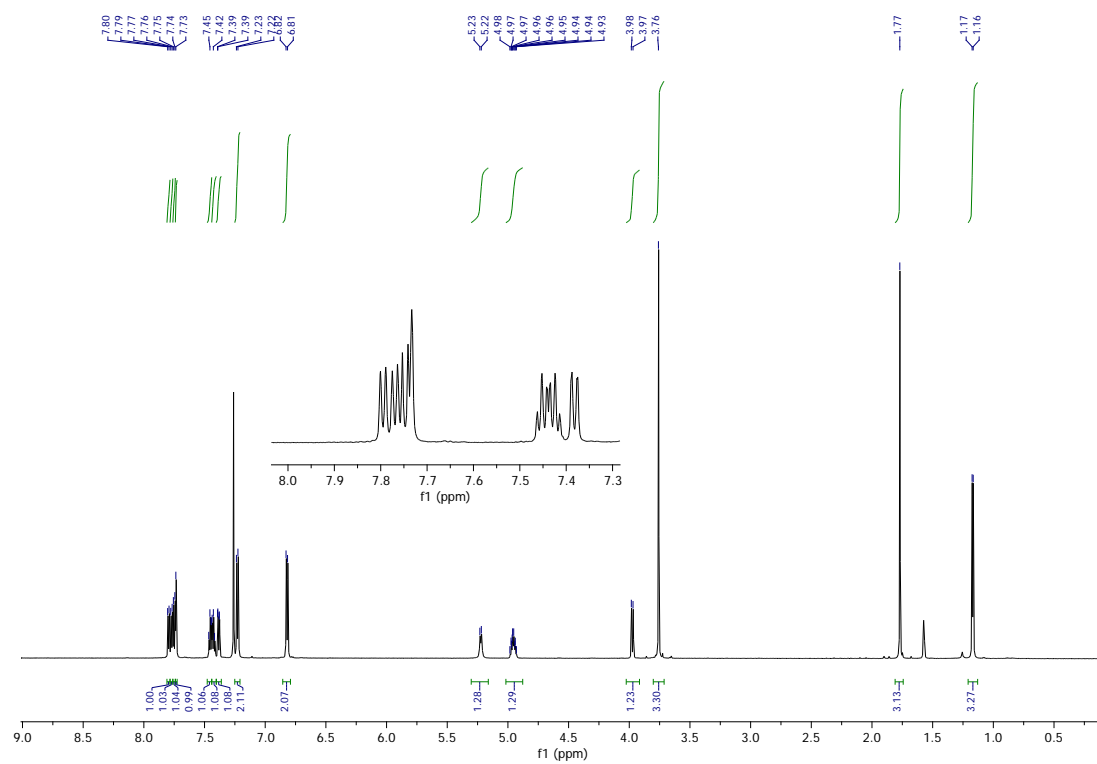

<sup>13</sup>C NMR (176 MHz, CDCl<sub>3</sub>) for 11

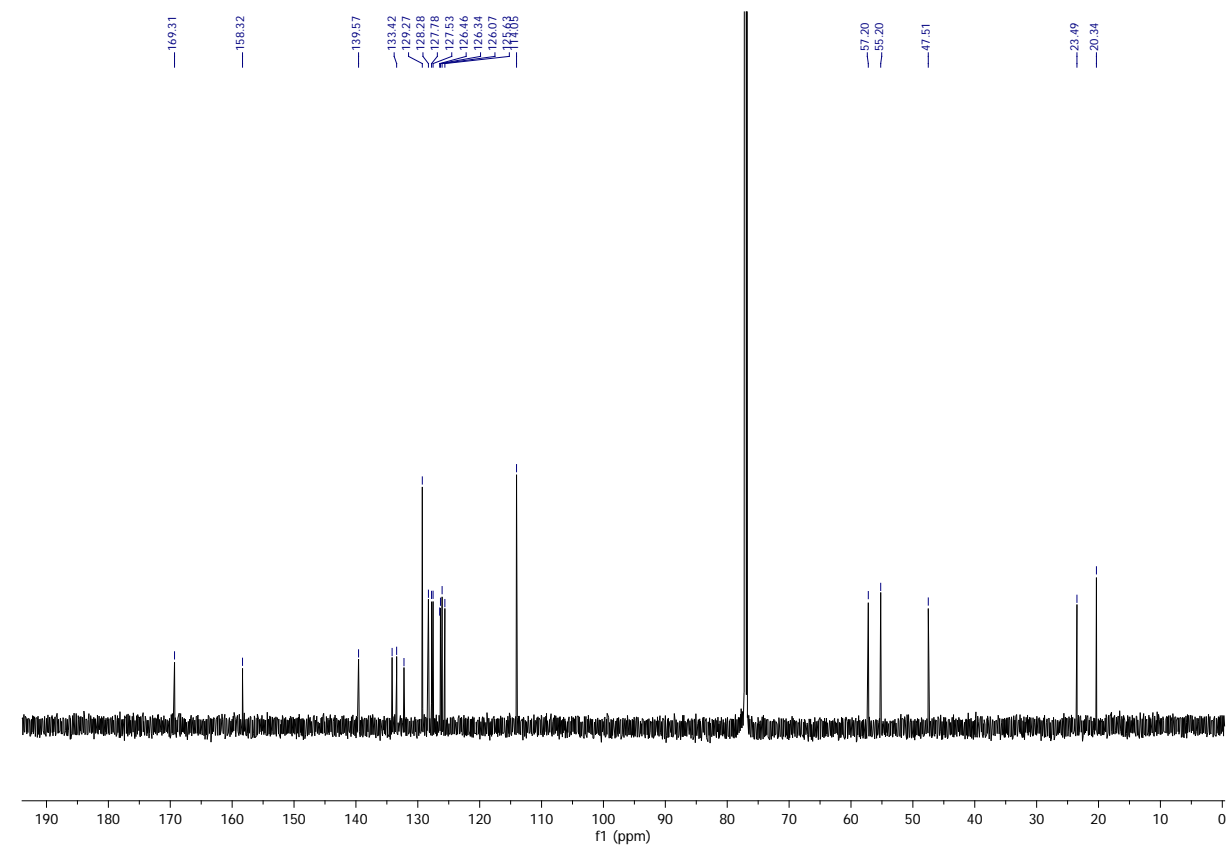

**N-1-(4-methoxyphenyl)-1-(thiophen-3-yl)propan-2-yl)acetamide (12)**

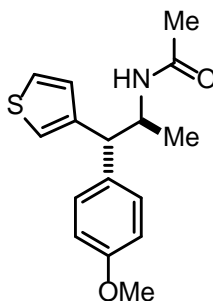

The **General Procedure A** was followed performing the reaction with *N*-(3-thienylsulfonyl)acetamide (62 mg, 0.3 mmol) and *trans*-anethole (54  $\mu$ L, 0.36 mmol) and purification by flash column chromatography (SiO<sub>2</sub>, 90:10 $\rightarrow$ 30:70 Hex:EtOAc) to furnish the title compound as a light yellow foam (26 mg, 30%).

**<sup>1</sup>H NMR** (700 MHz, CDCl<sub>3</sub>):  $\delta$  = 7.24 – 7.21 (m, 1H), 7.14 (d,  $J$  = 8.4 Hz, 2H), 7.09 (s, 1H), 6.93 (d,  $J$  = 4.8 Hz, 1H), 6.83 (d,  $J$  = 8.4 Hz, 2H), 5.20 (d,  $J$  = 8.1 Hz, 1H), 4.83 – 4.66 (m, 1H), 3.94 (d,  $J$  = 8.7 Hz, 1H), 3.78 (s, 3H), 1.87 (s, 3H), 1.07 (d,  $J$  = 6.5 Hz, 3H) ppm

**<sup>13</sup>C NMR** (176 MHz, CDCl<sub>3</sub>):  $\delta$  = 169.2, 158.4, 142.8, 133.4, 129.5, 127.8, 125.6, 120.9, 113.9, 55.2, 52.2, 48.2, 23.6, 19.6 ppm

**R<sub>f</sub>** (5:5 – EtOAc:Hex) = 0.1

**IR** (*neat*): 3325, 3000, 1628, 1511, 1373, 1251, 1032, 849, 796, 708 cm<sup>-1</sup>

**HRMS** (ESI+)  $m/z$  calculated for C<sub>16</sub>H<sub>19</sub>NO<sub>2</sub>S [M+H]<sup>+</sup> 290.1209, found 290.1211.

<sup>1</sup>H NMR (700 MHz, CDCl<sub>3</sub>) for 12

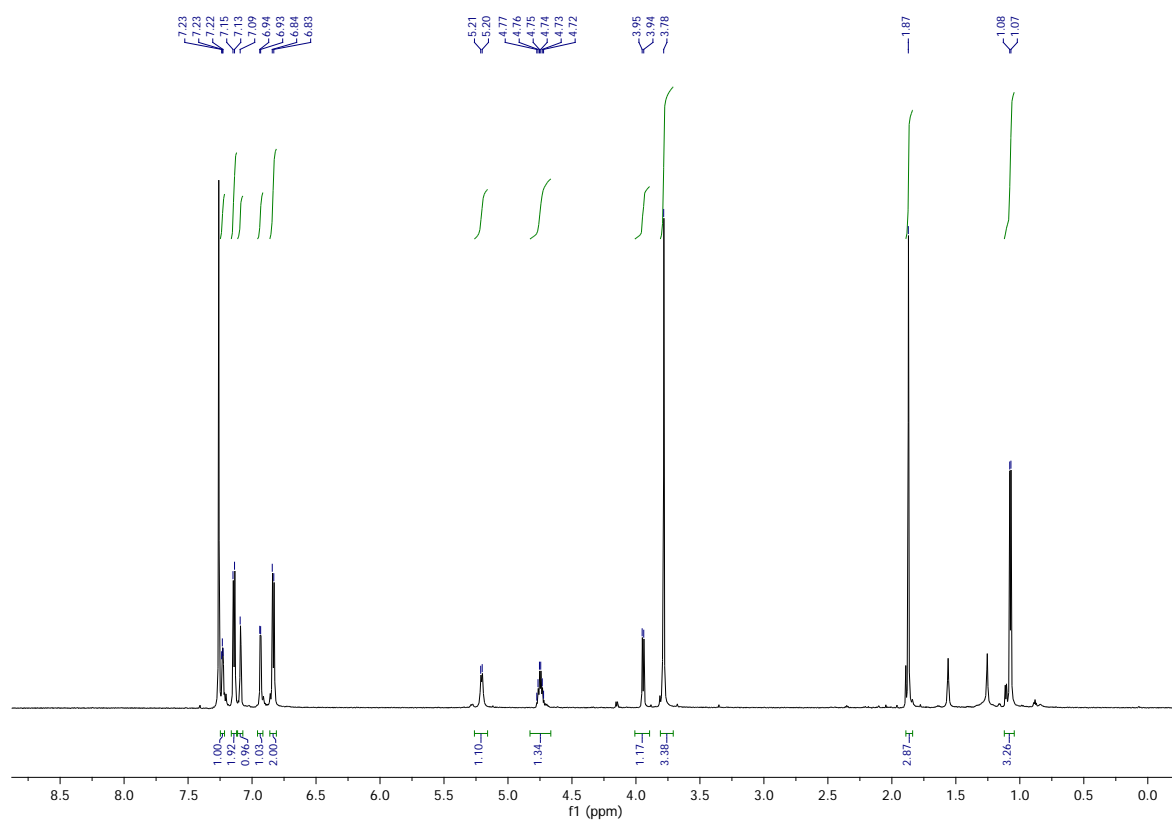

<sup>13</sup>C NMR (176 MHz, CDCl<sub>3</sub>) for 12

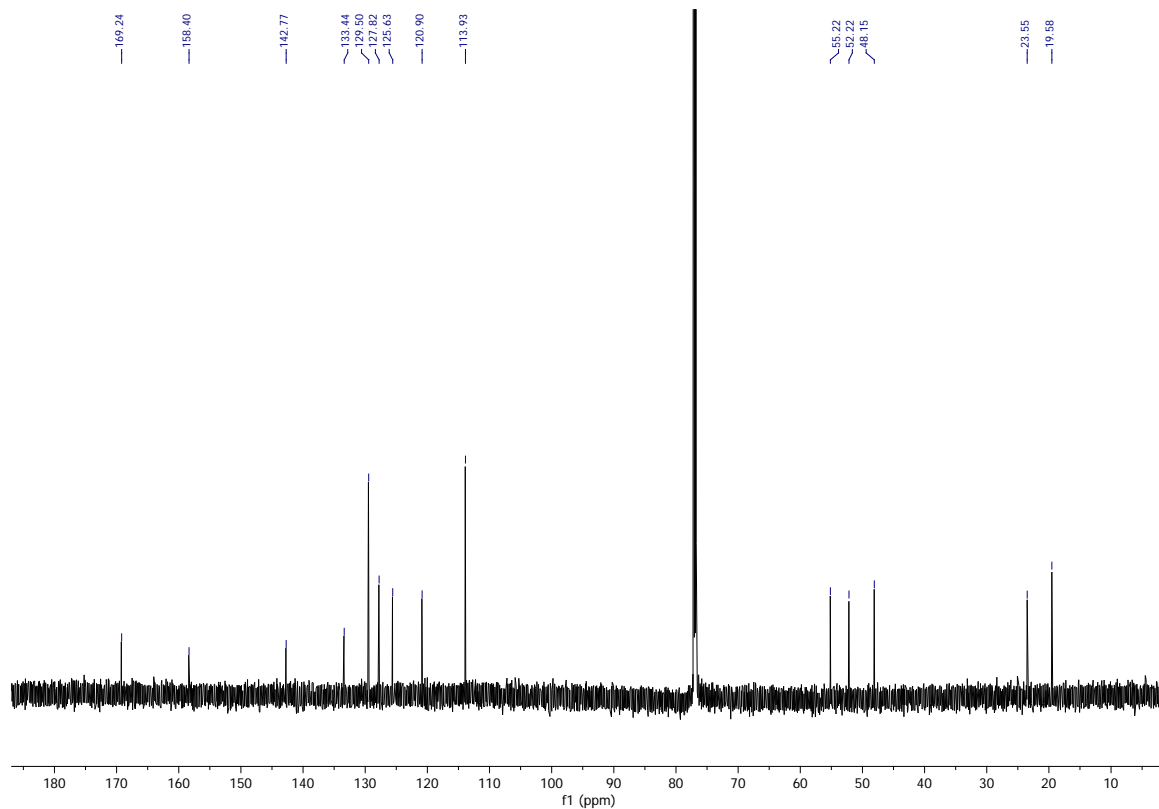

**methyl-2-acetamido-1-(4-methoxyphenyl)propyl)thiophene-2-carboxylate (13)**

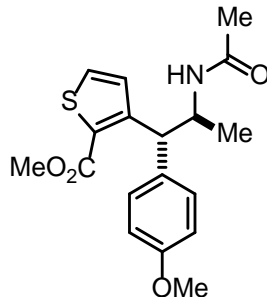

The **General Procedure A** was followed performing the reaction with methyl 3-(acetylsulfamoyl)thiophene-2-carboxylate (79 mg, 0.3 mmol) and *trans*-anethole (54  $\mu$ L, 0.36 mmol) and purification by flash column chromatography (SiO<sub>2</sub>, 90:10 $\rightarrow$ 30:70 Hex:EtOAc) to furnish the title compound as a light yellow foam (92 mg, 89%).

**<sup>1</sup>H NMR** (700 MHz, CDCl<sub>3</sub>):  $\delta$  = 7.36 (d,  $J$  = 5.2 Hz, 1H), 7.27 (d,  $J$  = 8.7 Hz, 2H), 7.15 (d,  $J$  = 5.2 Hz, 1H), 6.83 (d,  $J$  = 8.6 Hz, 2H), 5.86 (d,  $J$  = 9.0 Hz, 1H), 4.93 (d,  $J$  = 11.5 Hz, 1H), 4.86 – 4.65 (m, 1H), 3.89 (s, 3H), 3.77 (s, 3H), 1.75 (s, 3H), 1.12 (d,  $J$  = 6.4 Hz, 3H) ppm

**<sup>13</sup>C NMR** (176 MHz, CDCl<sub>3</sub>):  $\delta$  = 169.1, 163.9, 158.4, 151.8, 133.1, 130.9, 129.5, 129.0, 126.2, 114.0, 55.2, 52.0, 49.6, 49.1, 23.3, 20.7 ppm

**R<sub>f</sub>** (5:5 – EtOAc:Hex) = 0.1

**IR** (*neat*): 3289, 2941, 1718, 1639, 1585, 1512, 1445, 1226, 1104, 1075, 829 cm<sup>-1</sup>

**HRMS** (ESI+)  $m/z$  calculated for C<sub>18</sub>H<sub>21</sub>NO<sub>4</sub>S [M+H]<sup>+</sup> 348.1264, found 348.1265.



<sup>1</sup>H NMR (700 MHz, CDCl<sub>3</sub>) for 13

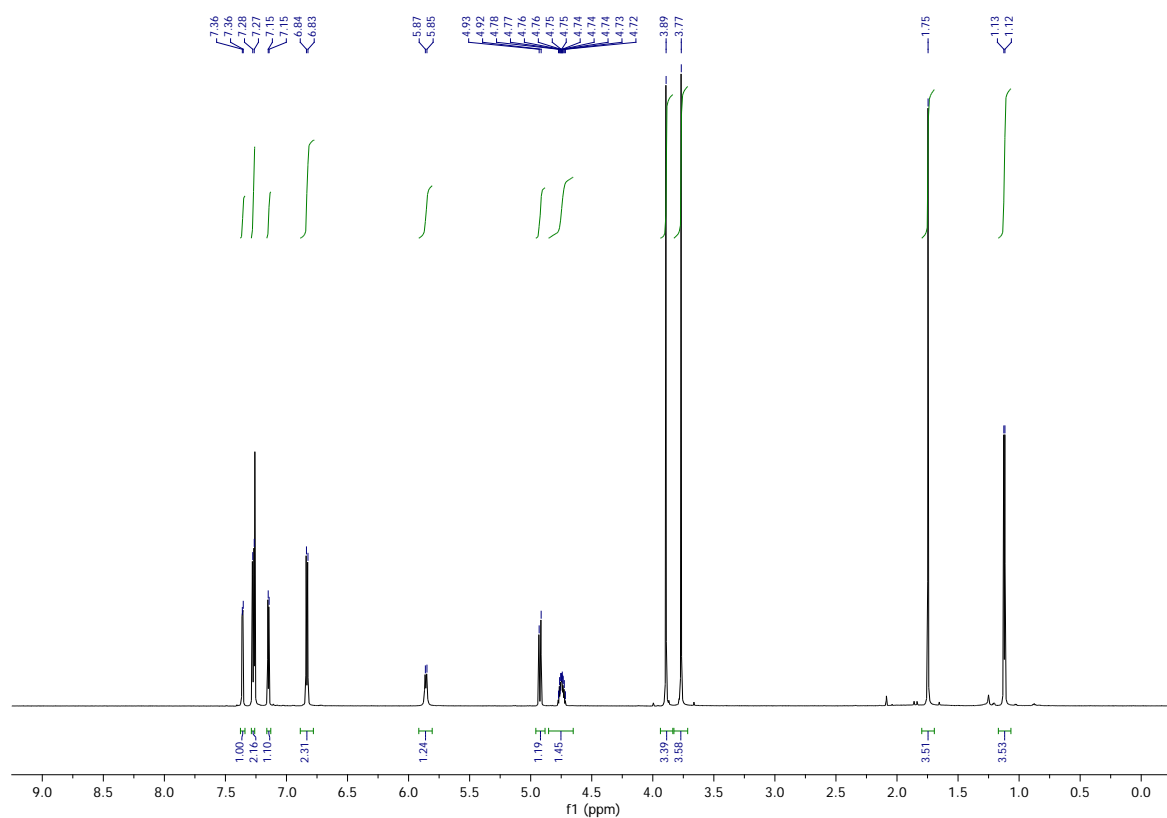

<sup>13</sup>C NMR (176 MHz, CDCl<sub>3</sub>) for 13

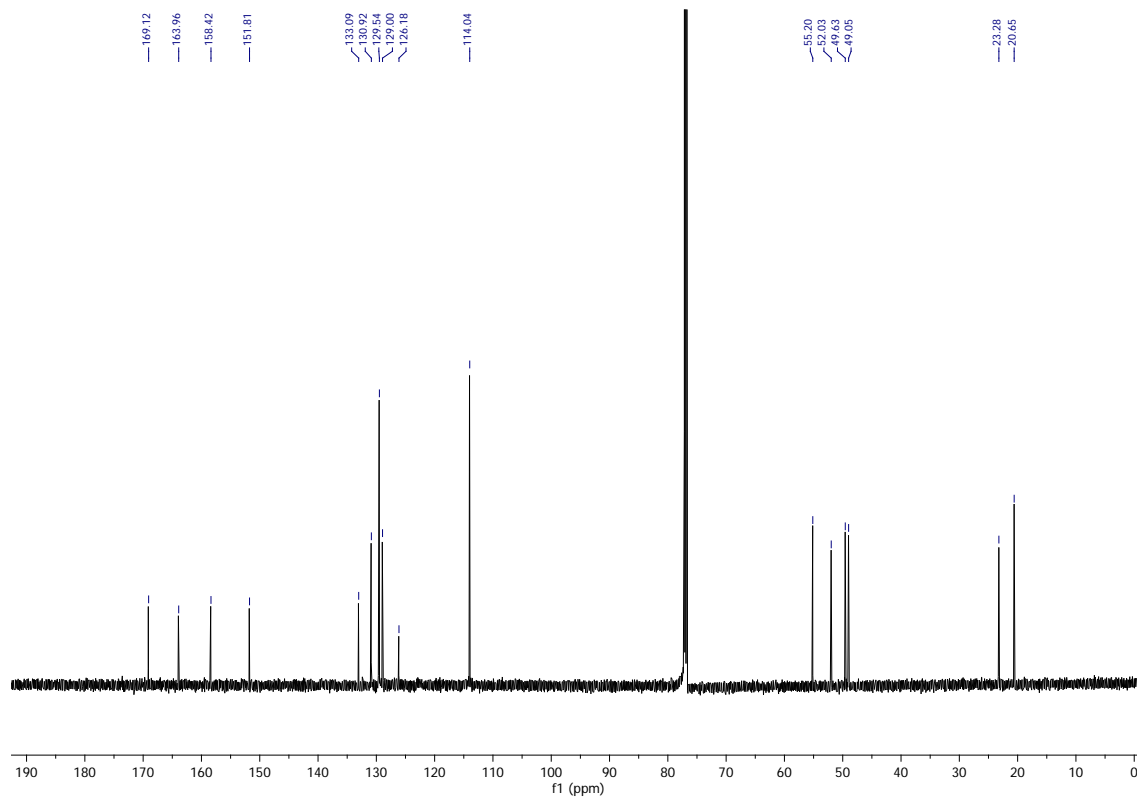

**N-1-(4-methoxyphenyl)-1-(thiophen-2-yl)propan-2-yl)acetamide (14)**

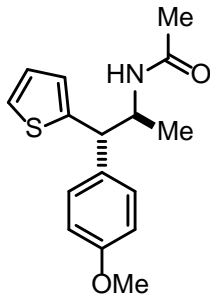

The **General Procedure A** was followed performing the reaction with *N*-(2-thienylsulfonyl)acetamide (62 mg, 0.3 mmol) and *trans*-anethole (54  $\mu$ L, 0.36 mmol) and purification by flash column chromatography (SiO<sub>2</sub>, 90:10 $\rightarrow$ 30:70 Hex:EtOAc) to furnish the title compound as a light yellow foam (69 mg, 69%).

**<sup>1</sup>H NMR** (700 MHz, CDCl<sub>3</sub>):  $\delta$  = 7.21 (d, *J* = 8.6 Hz, 2H), 7.15 (d, *J* = 4.9 Hz, 1H), 6.93 – 6.91 (m, 2H), 6.85 (d, *J* = 8.6 Hz, 2H), 5.31 (d, *J* = 8.3 Hz, 1H), 4.73 – 4.67 (m, 1H), 4.15 (d, *J* = 8.1 Hz, 1H), 3.79 (s, 3H), 1.89 (s, 3H), 1.11 (d, *J* = 6.6 Hz, 3H) ppm

**<sup>13</sup>C NMR** (176 MHz, CDCl<sub>3</sub>):  $\delta$  = 169.3, 158.6, 145.6, 133.2, 129.5, 126.7, 124.9, 124.1, 113.9, 55.2, 51.6, 49.1, 23.5, 19.5 ppm

R<sub>f</sub> (5:5 – EtOAc:Hex) = 0.1

**IR** (*neat*): 2987, 2983, 1638, 1538, 1512, 1373, 1282, 1030 cm<sup>-1</sup>

**HRMS** (ESI+) *m/z* calculated for C<sub>16</sub>H<sub>19</sub>NO<sub>2</sub>S [M+H]<sup>+</sup> 290.1209, found 290.1209.

$^1\text{H}$  NMR (700 MHz,  $\text{CDCl}_3$ ) for 14

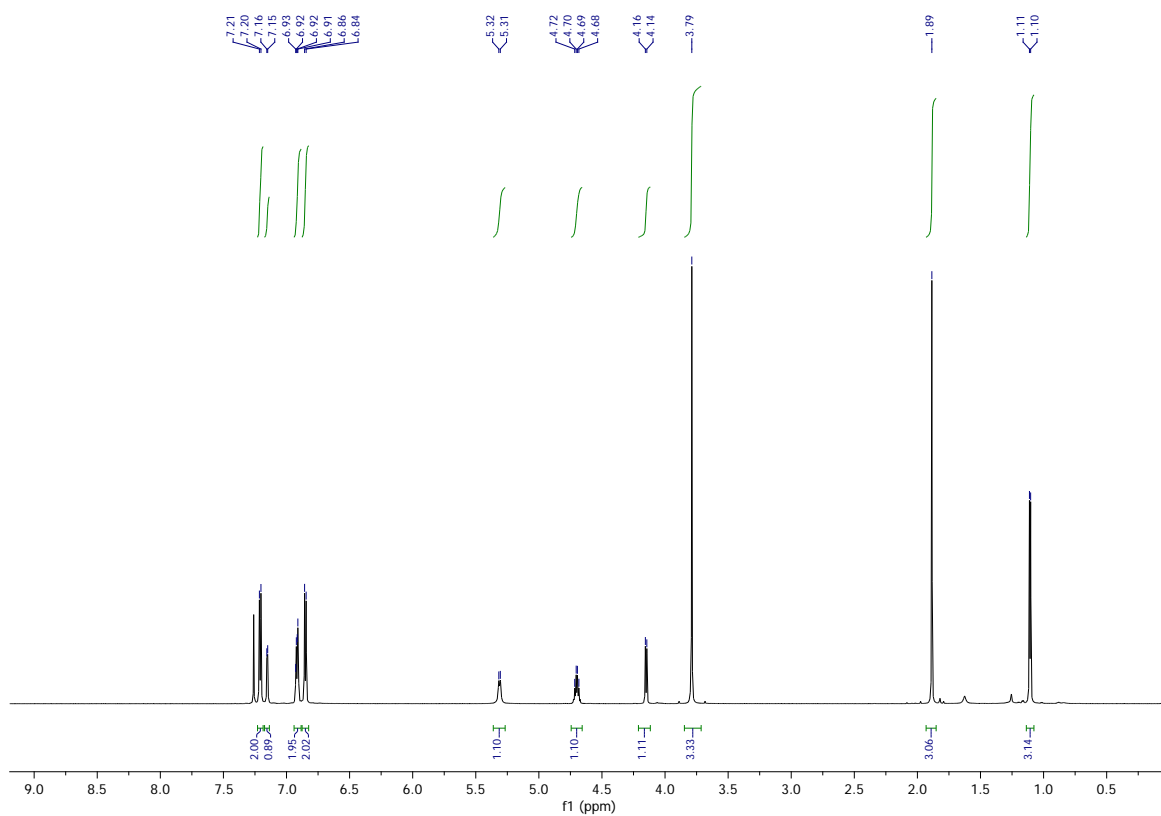

$^{13}\text{C}$  NMR (176 MHz,  $\text{CDCl}_3$ ) for 14

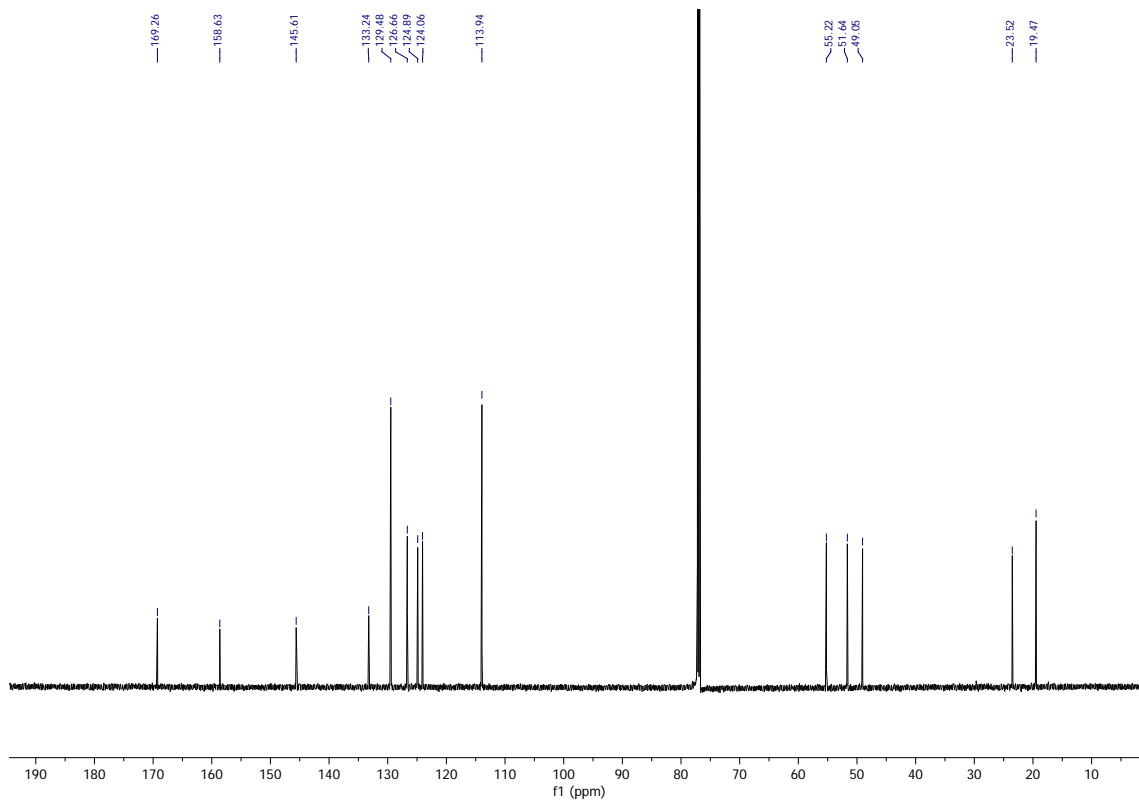

**N-1-(5-bromothiophen-2-yl)-1-(4-methoxyphenyl)propan-2-yl)acetamide (15)**

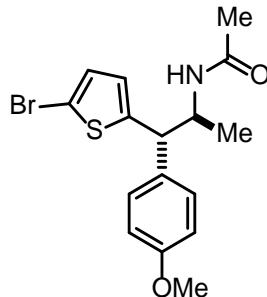

The **General Procedure A** was followed performing the reaction with *N*-[(5-bromo-2-thienyl)sulfonyl]acetamide (85 mg, 0.3 mmol) and *trans*-anethole (54  $\mu$ L, 0.36 mmol) and purification by flash column chromatography (SiO<sub>2</sub>, 90:10→30:70 Hex:EtOAc) to furnish the title compound as a light yellow foam (49 mg, 45%).

**<sup>1</sup>H NMR** (700 MHz, CDCl<sub>3</sub>):  $\delta$  = 7.17 (d, *J* = 8.5 Hz, 2H), 6.86 – 6.85 (m, 3H), 6.67 (d, *J* = 3.6 Hz, 1H), 5.27 (d, *J* = 7.4 Hz, 1H), 4.77 – 4.55 (m, 1H), 4.06 (d, *J* = 8.1 Hz, 1H), 3.79 (s, 3H), 1.92 (s, 3H), 1.09 (d, *J* = 6.6 Hz, 3H) ppm

**<sup>13</sup>C NMR** (176 MHz, CDCl<sub>3</sub>):  $\delta$  = 169.3, 158.8, 147.5, 132.4, 129.5, 129.4, 125.2, 114.1, 110.5, 55.3, 51.9, 48.7, 23.6, 19.3 ppm

**R<sub>f</sub>** (5:5 – EtOAc:Hex) = 0.1

**IR** (*neat*): 3313, 2930, 1627, 1511, 1446, 1372, 1281, 1222, 1175, 801 cm<sup>-1</sup>

**HRMS** (ESI+) *m/z* calculated for C<sub>16</sub>H<sub>18</sub>BrNO<sub>2</sub>S [M+H]<sup>+</sup> 368.0314, found 368.0315.

<sup>1</sup>H NMR (700 MHz, CDCl<sub>3</sub>) for 15

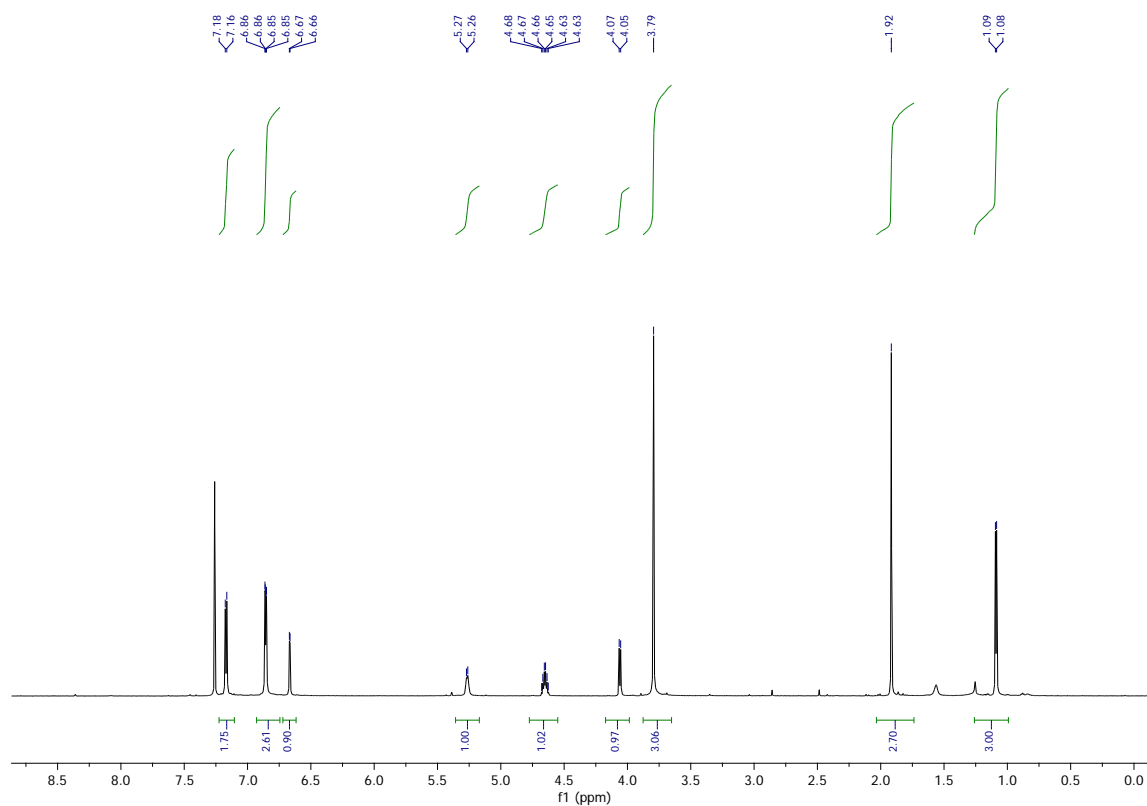

<sup>13</sup>C NMR (176 MHz, CDCl<sub>3</sub>) for 15

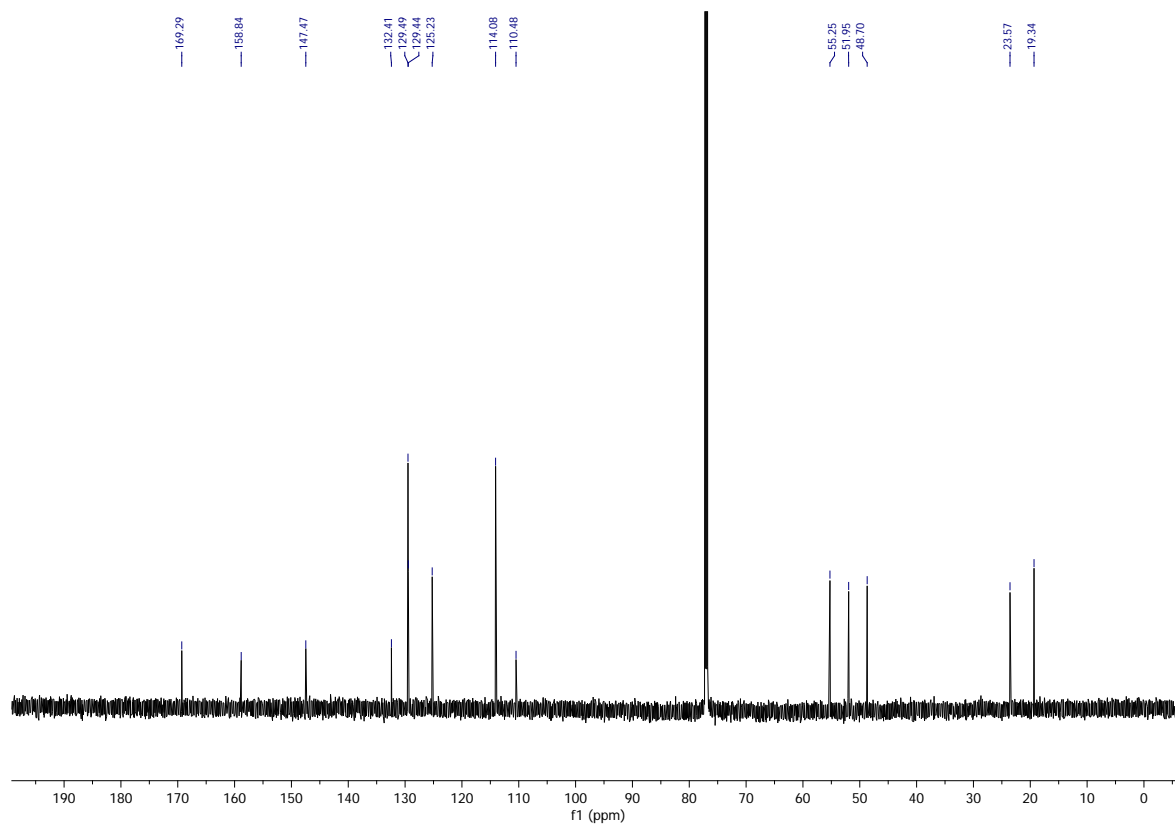

**Methyl-2-acetamido-1-(4-methoxyphenyl)propyl)furan-2-carboxylate (16)**

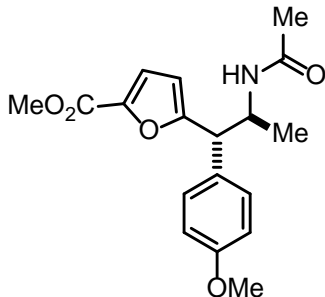

The **General Procedure A** was followed performing the reaction with methyl 5-(acetylsulfamoyl)furan-2-carboxylate (74 mg, 0.3 mmol) and *trans*-anethole (54  $\mu$ L, 0.36 mmol) and purification by flash column chromatography ( $\text{SiO}_2$ , 90:10 $\rightarrow$ 30:70 Hex:EtOAc) to furnish the title compound as a white foam (79 mg, 80%).

**$^1\text{H}$  NMR** (700 MHz,  $\text{CDCl}_3$ ):  $\delta$  = 7.19 (d,  $J$  = 8.7 Hz, 2H), 7.09 (d,  $J$  = 3.5 Hz, 1H), 6.86 (d,  $J$  = 8.7 Hz, 2H), 6.29 (d,  $J$  = 3.4 Hz, 1H), 5.53 (d,  $J$  = 9.3 Hz, 1H), 4.77 – 4.60 (m, 1H), 4.05 (d,  $J$  = 8.2 Hz, 1H), 3.86 (s, 3H), 3.79 (s, 3H), 1.89 (s, 3H), 1.07 (d,  $J$  = 6.7 Hz, 3H) ppm

**$^{13}\text{C}$  NMR** (176 MHz,  $\text{CDCl}_3$ ):  $\delta$  = 169.3, 160.4, 159.1, 158.9, 143.5, 130.1, 129.5, 119.1, 114.1, 109.3, 55.2, 51.8, 50.4, 48.2, 23.5, 19.5 ppm

$R_f$  (5:5 – EtOAc:Hex) = 0.1

**IR** (*neat*): 3294, 2989, 1721, 1634, 1628, 1515, 1308, 1251, 1126, 1031, 826  $\text{cm}^{-1}$

**HRMS** (ESI+)  $m/z$  calculated for  $\text{C}_{18}\text{H}_{21}\text{NO}_5$   $[\text{M}+\text{H}]^+$  332.1492, found 332.1491.

<sup>1</sup>H NMR (700 MHz, CDCl<sub>3</sub>) for 16

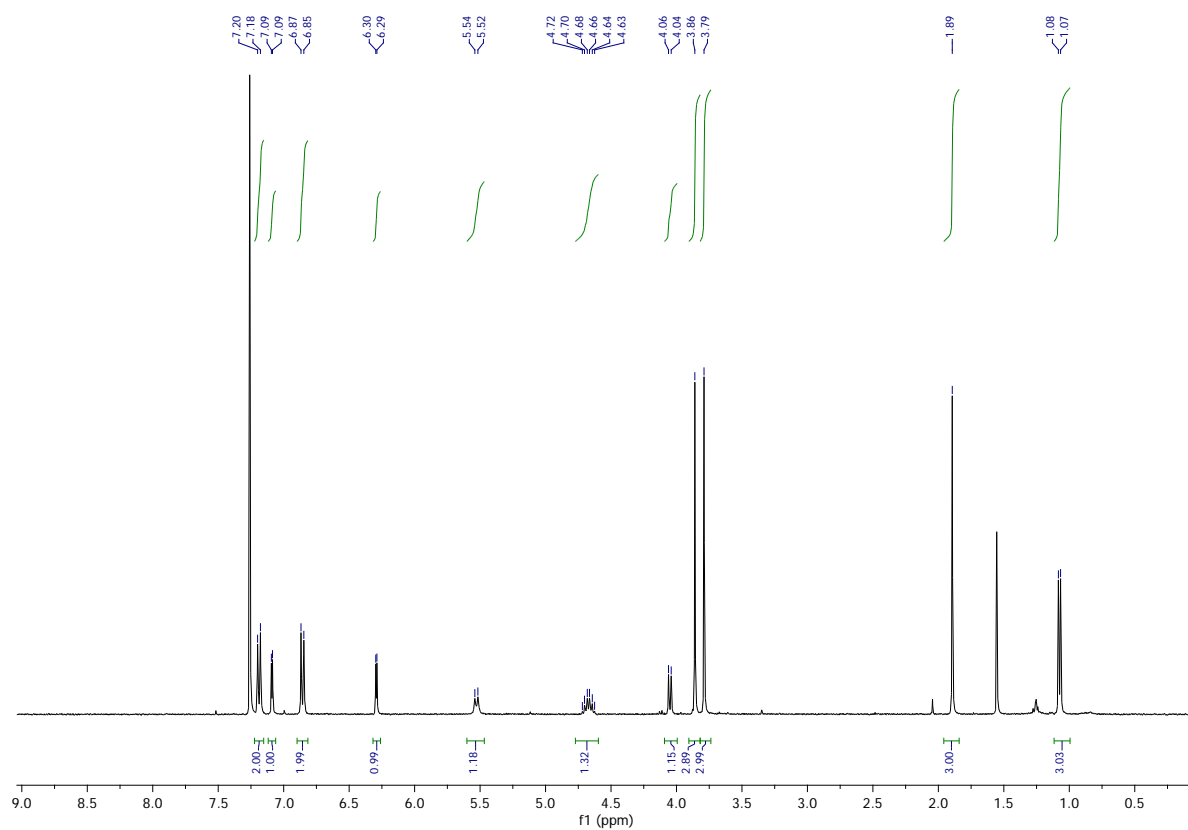

<sup>13</sup>C NMR (176 MHz, CDCl<sub>3</sub>) for 16

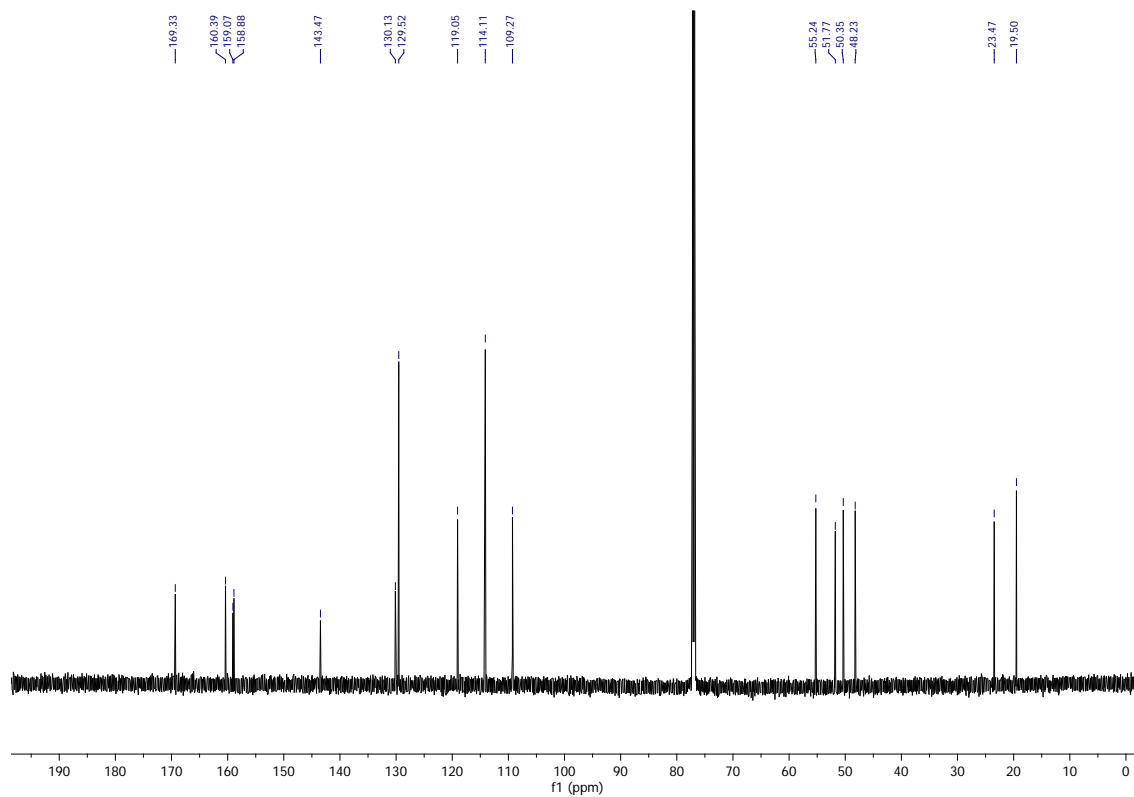

**N-1-(4-methoxyphenyl)-1-(quinolin-8-yl)propan-2-yl)acetamide (17)**

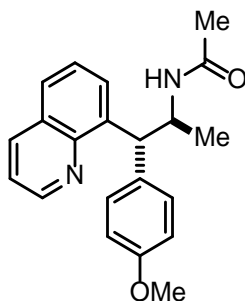

The **General Procedure A** was followed performing the reaction with methyl *N*-(8-quinolylsulfonyl)acetamide (62 mg, 0.25 mmol) and *trans*-anethole (44  $\mu$ L, 0.3 mmol) and purification by flash column chromatography (SiO<sub>2</sub>, 90:10→30:70 Hex:EtOAc) to furnish the title compound as a light yellow foam (47 mg, 58%).

**<sup>1</sup>H NMR** (700 MHz, CDCl<sub>3</sub>):  $\delta$  = 8.95 (d,  $J$  = 2.7 Hz, 1H), 8.16 (d,  $J$  = 8.1 Hz, 1H), 7.67 (d,  $J$  = 7.3 Hz, 1H), 7.65 (d,  $J$  = 8.0 Hz, 1H), 7.47 (t,  $J$  = 7.7 Hz, 1H), 7.42 (dd,  $J$  = 8.2, 4.1 Hz, 1H), 7.35 (d,  $J$  = 8.6 Hz, 2H), 6.83 (d,  $J$  = 8.6 Hz, 2H), 6.44 (s, 1H), 5.45 (d,  $J$  = 11.1 Hz, 1H), 4.89 – 4.76 (m, 1H), 3.76 (s, 3H), 1.48 (s, 3H), 1.25 (d,  $J$  = 6.3 Hz, 3H) ppm

**<sup>13</sup>C NMR** (176 MHz, CDCl<sub>3</sub>):  $\delta$  = 169.1, 158.1, 149.2, 146.6, 141.1, 136.9, 134.2, 129.8, 128.8, 128.4, 126.8, 126.5, 120.8, 113.8, 55.2, 49.6, 48.9, 23.1, 21.0 ppm

**R<sub>f</sub>** (5:5 – EtOAc:Hex) = 0.1

**IR** (*neat*): 3259, 2965, 1664, 1638, 1495, 1369, 1302, 1230, 1031, 930 cm<sup>-1</sup>

**HRMS** (ESI+)  $m/z$  calculated for C<sub>21</sub>H<sub>22</sub>N<sub>2</sub>O<sub>2</sub> [M+H]<sup>+</sup> 335.1754, found 335.1752.



<sup>1</sup>H NMR (700 MHz, CDCl<sub>3</sub>) for 17

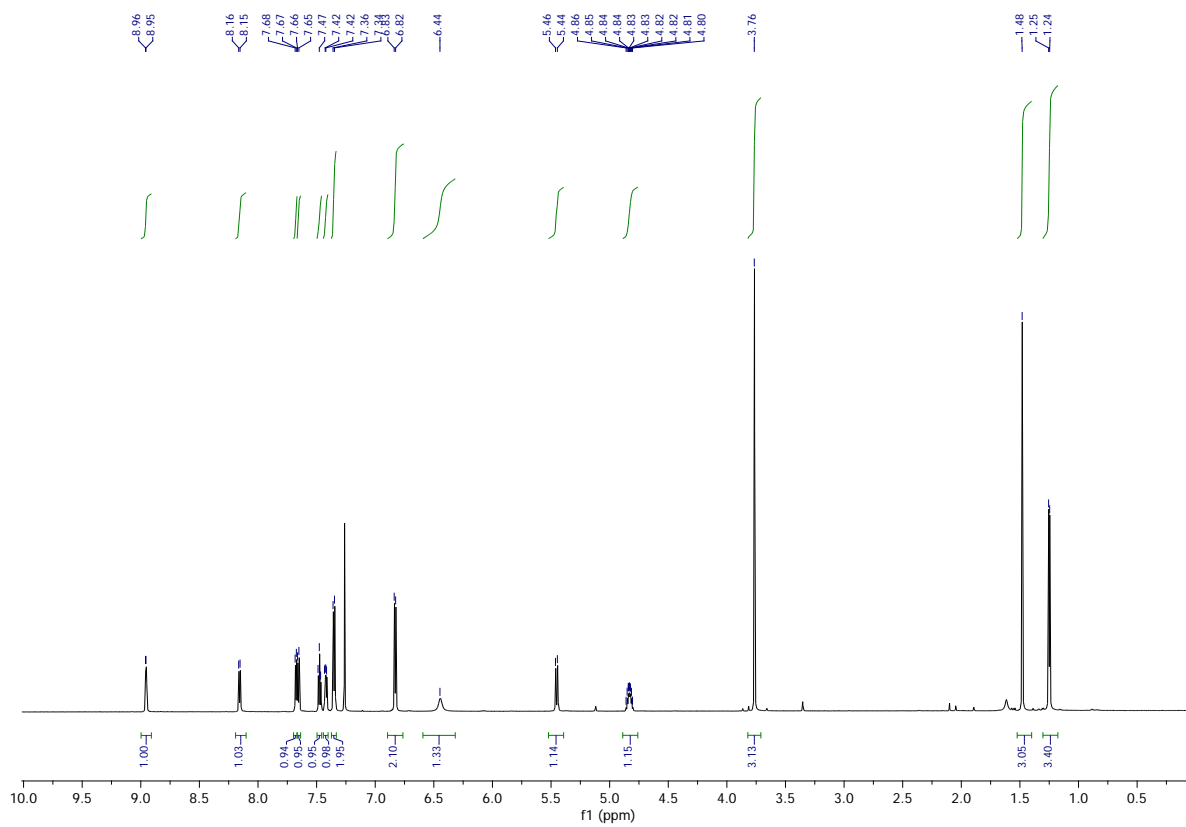

<sup>13</sup>C NMR (176 MHz, CDCl<sub>3</sub>) for 17

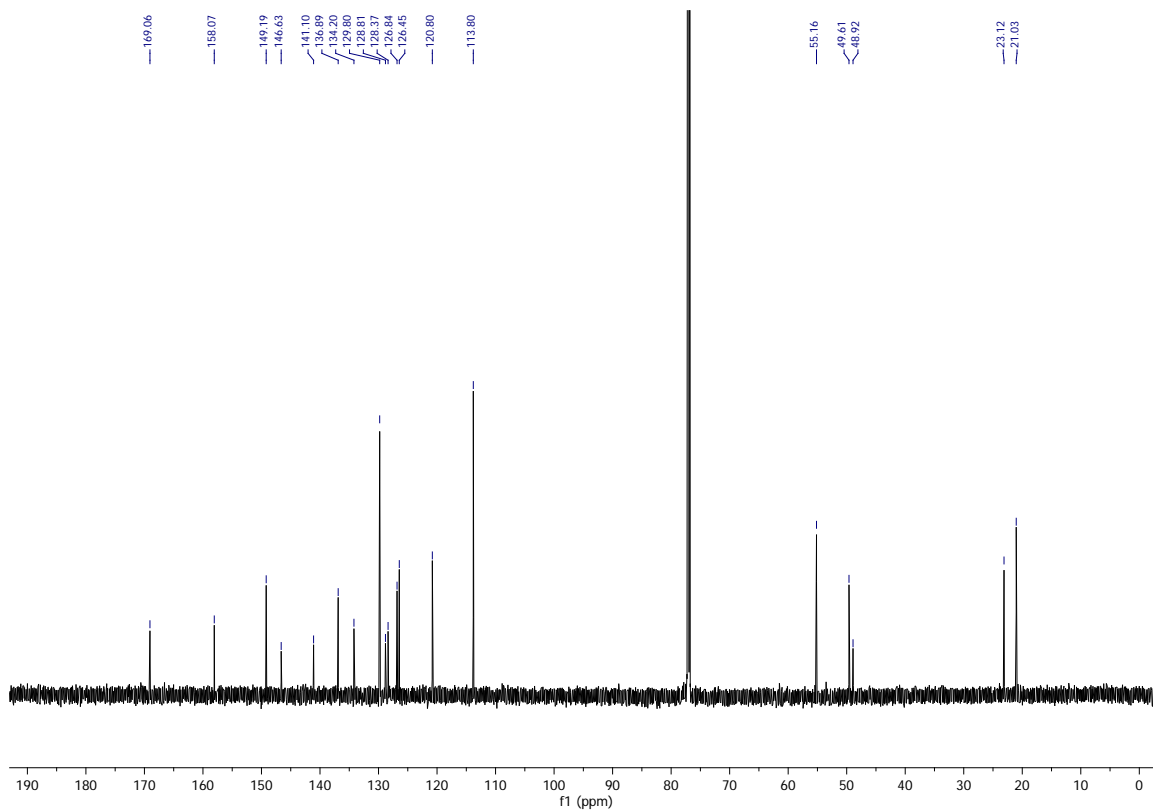

**N-1-(5-chlorothiophen-2-yl)-1-(4-methoxyphenyl)propan-2-yl)acetamide (18)**

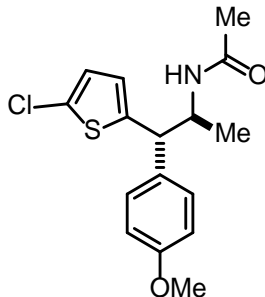

The **General Procedure A** was followed performing the reaction with *N*-[(5-chloro-2-thienyl)sulfonyl]acetamide (72 mg, 0.3 mmol) and *trans*-anethole (54  $\mu$ L, 0.36 mmol) and purification by flash column chromatography (SiO<sub>2</sub>, 90:10→30:70 Hex:EtOAc) to furnish the title compound as a light yellow foam (67 mg, 79%).

**<sup>1</sup>H NMR** (700 MHz, CDCl<sub>3</sub>):  $\delta$  = 7.17 (d, *J* = 8.6 Hz, 2H), 6.86 (d, *J* = 8.6 Hz, 2H), 6.71 (d, *J* = 3.8 Hz, 1H), 6.68 (d, *J* = 3.6 Hz, 1H), 5.30 (d, *J* = 8.5 Hz, 1H), 4.71 – 4.58 (m, 1H), 4.03 (d, *J* = 8.2 Hz, 1H), 3.79 (s, 3H), 1.92 (s, 3H), 1.09 (d, *J* = 6.6 Hz, 3H) ppm

**<sup>13</sup>C NMR** (176 MHz, CDCl<sub>3</sub>):  $\delta$  = 169.3, 158.8, 144.6, 132.4, 129.5, 128.3, 125.6, 124.2, 114.1, 55.2, 51.9, 48.7, 23.6, 19.3 ppm

**R<sub>f</sub>** (5:5 – EtOAc:Hex) = 0.1

**IR** (*neat*): 3275, 2985, 1652, 1585, 1511, 1484, 1249, 1034 cm<sup>-1</sup>

**HRMS** (ESI+) *m/z* calculated for C<sub>16</sub>H<sub>18</sub>ClNO<sub>2</sub>S [M+H]<sup>+</sup> 324.0820, found 324.0819.

<sup>1</sup>H NMR (700 MHz, CDCl<sub>3</sub>) for 18

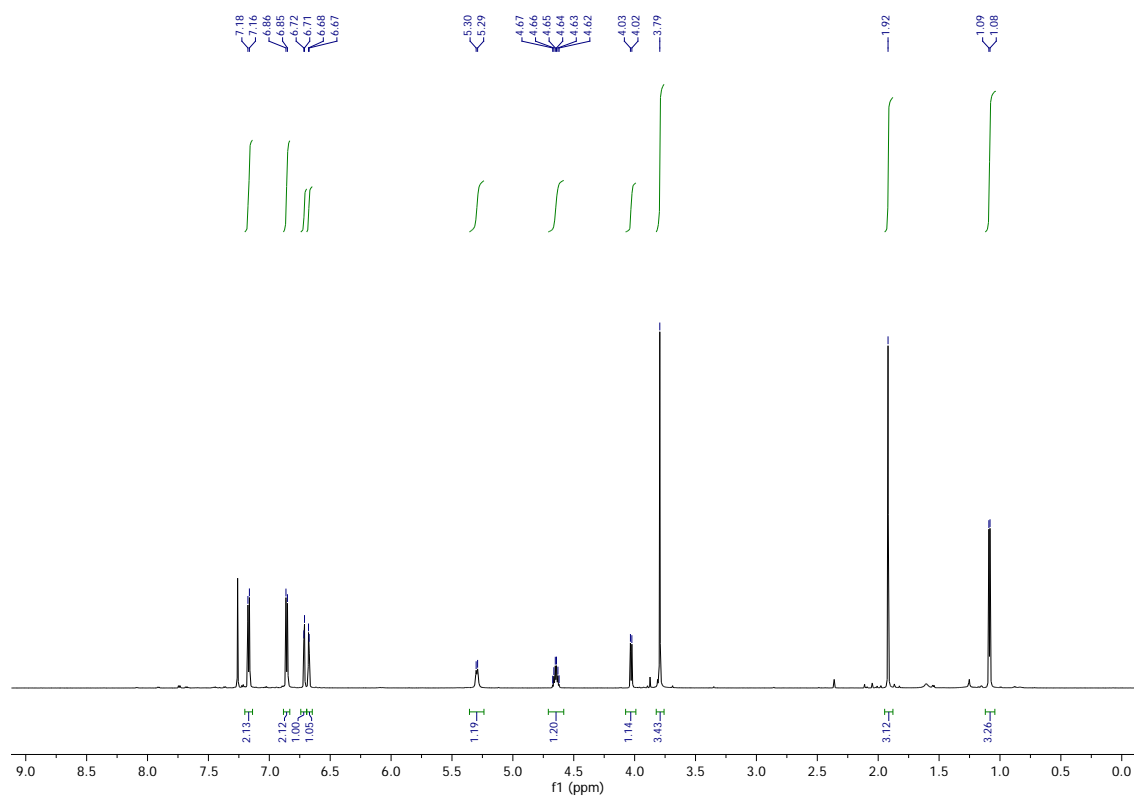

<sup>13</sup>C NMR (176 MHz, CDCl<sub>3</sub>) for 18

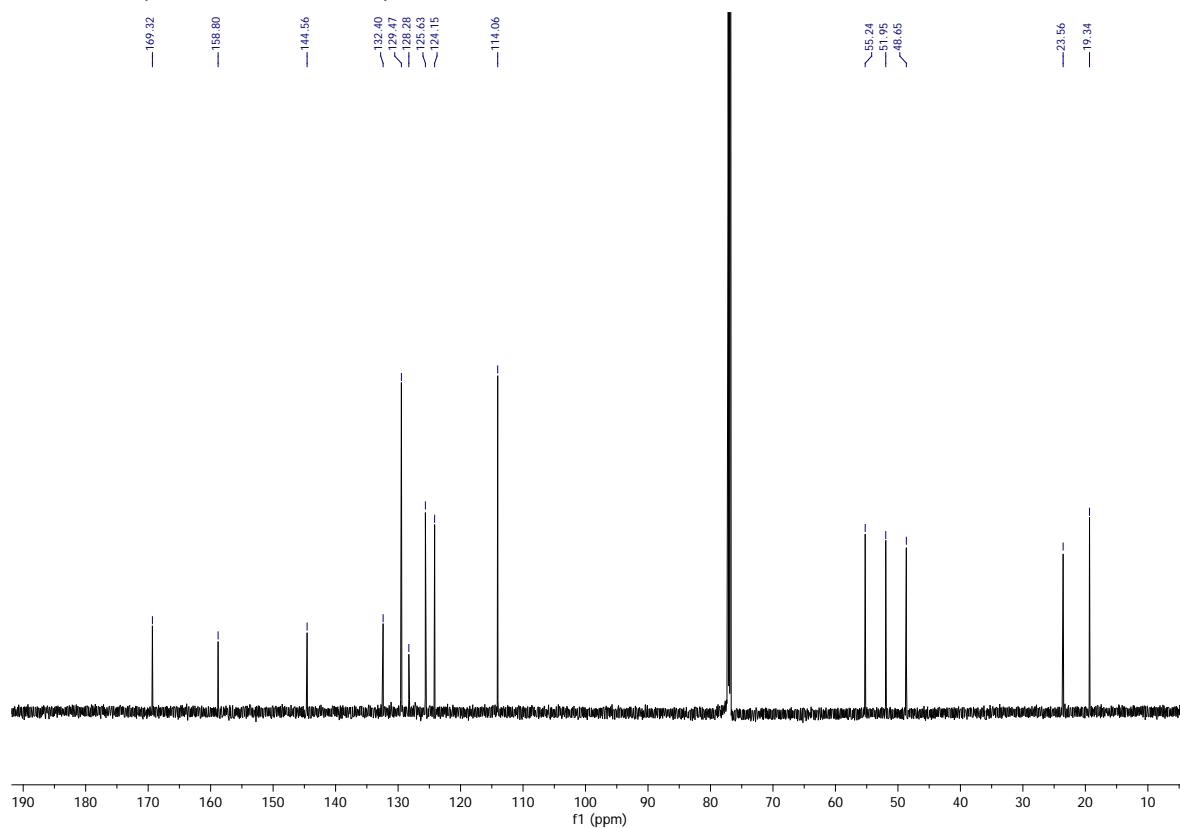

**N-1-(benzothiazol-2-yl)-1-(4-methoxyphenyl)propan-2-yl)acetamide (19)**

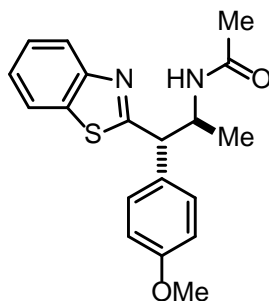

The **General Procedure A** was followed performing the reaction with *N*-(1,3-benzothiazol-2-ylsulfonyl)acetamide (77 mg, 0.3 mmol) and *trans*-anethole (54  $\mu$ L, 0.36 mmol) and purification by flash column chromatography ( $\text{SiO}_2$ , 90:10 $\rightarrow$ 30:70 Hex:EtOAc) to furnish the title compound as a light yellow foam (43 mg, 42%).

**$^1\text{H}$  NMR** (700 MHz,  $\text{CDCl}_3$ ):  $\delta$  = 8.03 (d,  $J$  = 8.2 Hz, 1H), 7.83 (d,  $J$  = 8.0 Hz, 1H), 7.49 (t,  $J$  = 7.7 Hz, 1H), 7.38 (t,  $J$  = 7.6 Hz, 1H), 7.27 (d,  $J$  = 8.7 Hz, 2H), 6.90 (d,  $J$  = 8.3 Hz, 1H), 6.85 (d,  $J$  = 8.6 Hz, 2H), 4.76 (dq,  $J$  = 13.0, 6.4 Hz, 1H), 4.48 (d,  $J$  = 5.9 Hz, 1H), 3.78 (s, 3H), 1.91 (s, 3H), 1.27 (d,  $J$  = 6.7 Hz, 3H) ppm

**$^{13}\text{C}$  NMR** (176 MHz,  $\text{CDCl}_3$ ):  $\delta$  = 171.9, 169.4, 159.0, 152.9, 134.9, 130.9, 129.4, 126.1, 125.1, 122.9, 121.6, 114.1, 55.2, 53.8, 49.7, 23.6, 20.1 ppm

$R_f$  (5:5 – EtOAc:Hex) = 0.1

**IR** (*neat*): 3309, 2924, 1639, 1531, 1515, 1247, 1183, 1038, 832, 757  $\text{cm}^{-1}$

**HRMS** (ESI+)  $m/z$  calculated for  $\text{C}_{19}\text{H}_{20}\text{N}_2\text{O}_2\text{S}$   $[\text{M}+\text{H}]^+$  341.1318, found 341.1320.

<sup>1</sup>H NMR (700 MHz, CDCl<sub>3</sub>) for 19

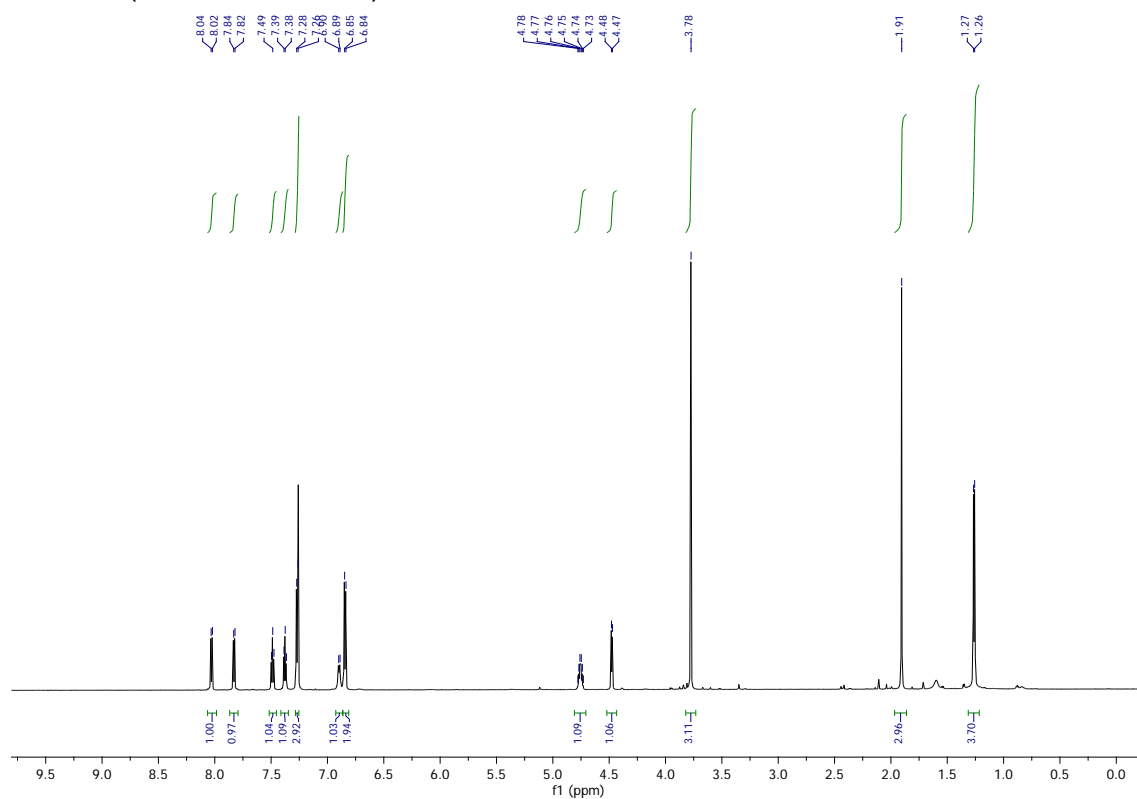

<sup>13</sup>C NMR (176 MHz, CDCl<sub>3</sub>) for 19

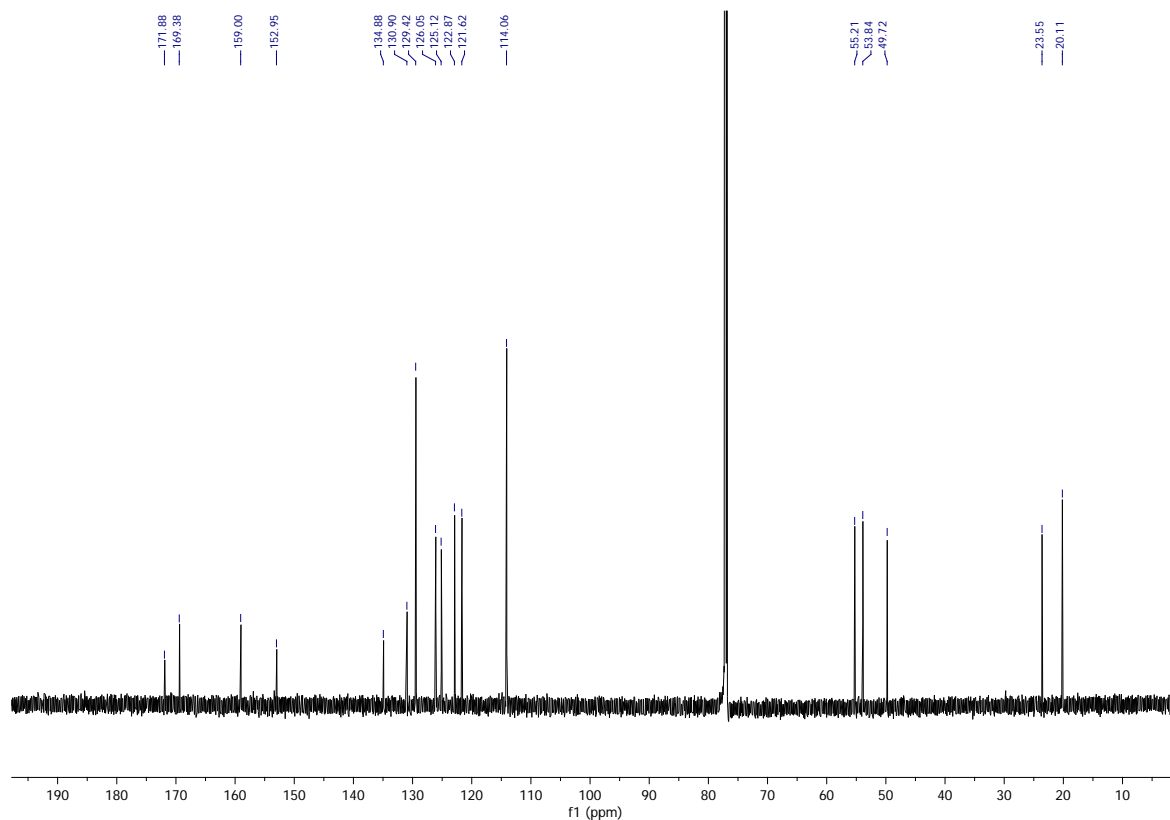



<sup>1</sup>H NMR (700 MHz, CDCl<sub>3</sub>) for 20

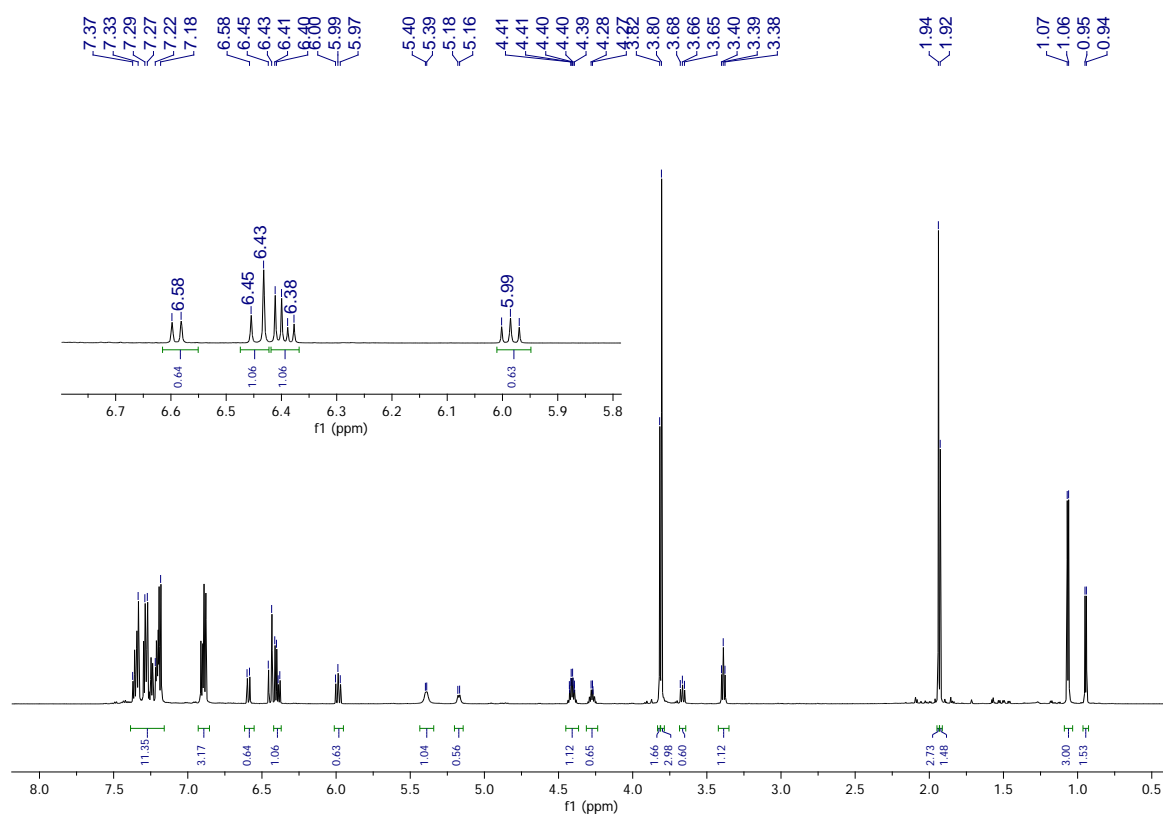

<sup>13</sup>C NMR (176 MHz, CDCl<sub>3</sub>) for 20

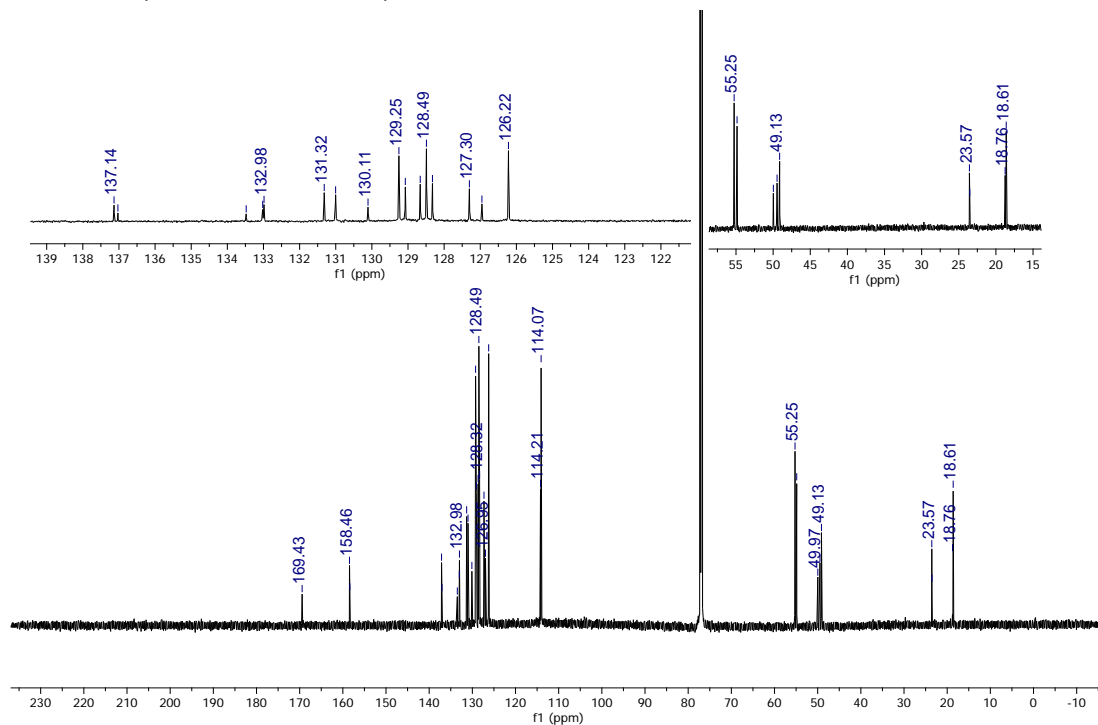

**N-(1-(4-methoxyphenyl)-3-((4-methyl-N-(2-oxo-2-phenylethyl)phenyl)sulfonamido)-1-(naphthalen-1-yl)propan-2-yl)acetamide (21)**

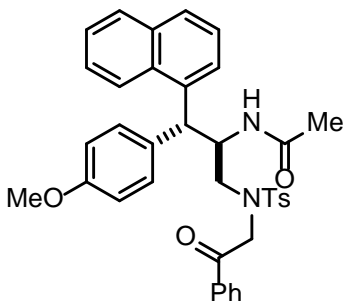

The **General Procedure A** was followed performing the reaction with N-(1-naphthylsulfonyl)acetamide (18.9 mg, 0.0758 mmol) and *N*-[(*E*)-3-(4-methoxyphenyl)allyl]-4-methyl-*N*-phenacyl-benzenesulfonamide (33.0 mg, 0.0758 mmol) and purification by flash column chromatography (SiO<sub>2</sub>, 30:70 Hex:EtOAc) to furnish the title compound (10 mg, 28%).

**<sup>1</sup>H NMR** (700 MHz, CDCl<sub>3</sub>) δ = 8.16 (d, *J* = 8.6 Hz, 1H), 7.83 (d, *J* = 8.0 Hz, 2H), 7.80 (d, *J* = 8.0 Hz, 1H), 7.69 (d, *J* = 8.1 Hz, 1H), 7.62 – 7.55 (m, 4H), 7.45 (m, 5H), 7.22 (d, *J* = 8.2 Hz, 2H), 7.20 (d, *J* = 8.6 Hz, 2H), 6.69 (d, *J* = 8.6 Hz, 2H), 5.71 (d, *J* = 9.2 Hz, 1H, N-H), 5.13 (ddd, *J* = 20.1, 9.8, 3.8 Hz, 1H), 4.96, 4.81 (ABq, 2H, *J*<sub>AB</sub> = 18.9) 4.87 (d, *J* = 9.9 Hz, 1H), 3.64 (dd, *J* = 15.1, 10.1 Hz, 1H), 3.31 (dd, *J* = 15.1, 3.7 Hz, 1H) ppm

**<sup>13</sup>C NMR (mixture)**: (176 MHz, CDCl<sub>3</sub>) δ = 193.7, 171.1, 158.3, 143.4, 137.2, 137.0, 134.8, 134.1, 133.9, 132.8, 131.7, 129.5, 129.1, 128.8, 127.9, 127.4, 127.3, 126.2, 125.5, 125.3, 124.6, 123.1, 114.2, 55.1, 52.4, 50.7, 49.3, 48.2, 23.3, 21.5 ppm

R<sub>f</sub> (7:3 – EtOAc:Hex) = 0.5

**IR** (*neat*): 2833, 2790, 2752, 2730, 2709, 1699, 1658, 1597, 1511, 1449, 1333, 1304, 1253, 1226, 1157, 1033, 980, 812, 785 cm<sup>-1</sup>

**HRMS** (ESI+) *m/z* calculated for C<sub>37</sub>H<sub>36</sub>N<sub>2</sub>O<sub>5</sub>S [M+H]<sup>+</sup> 621.2423, found 621.2418.



<sup>1</sup>H NMR (700 MHz, CDCl<sub>3</sub>) for 21

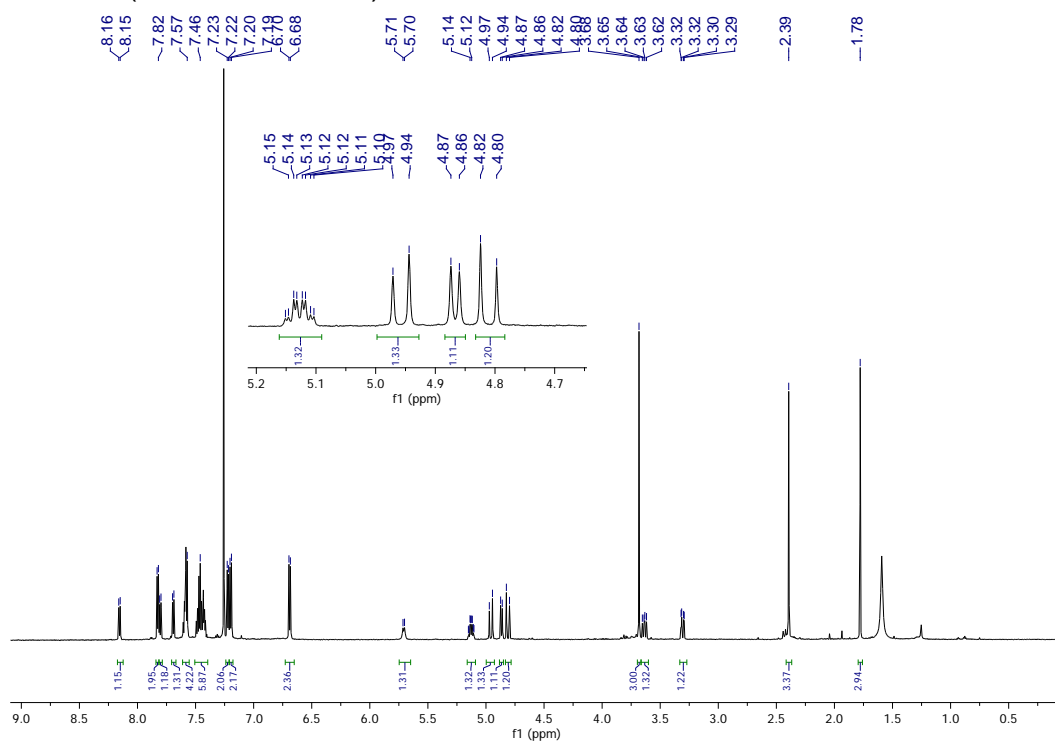

<sup>13</sup>C NMR (176 MHz, CDCl<sub>3</sub>) for 21

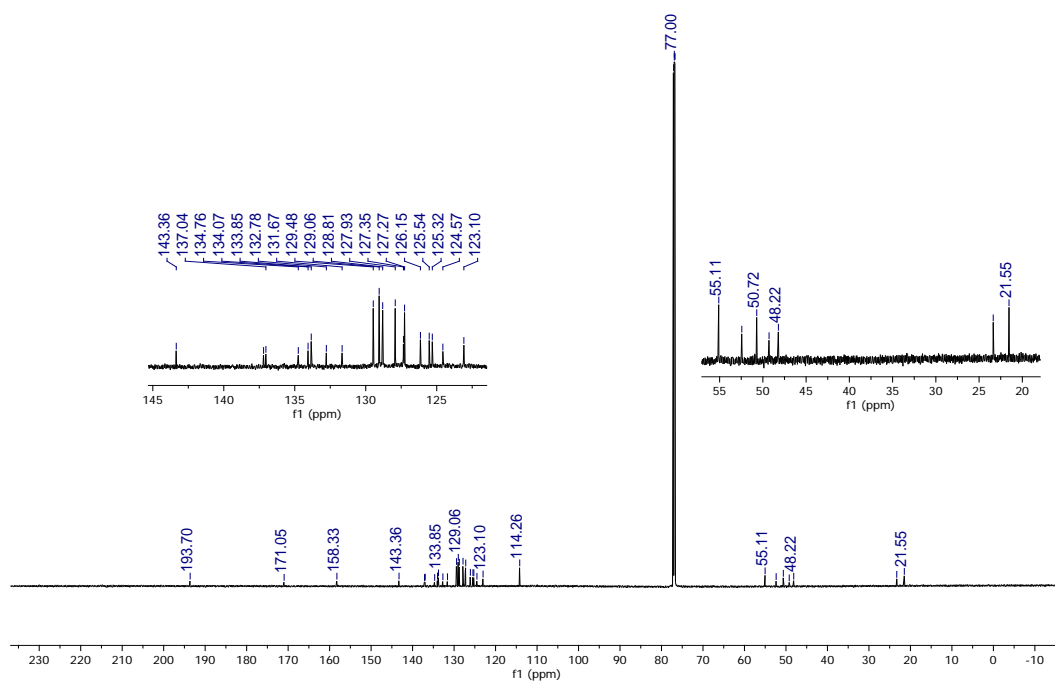

**2-acetamido-3-(4-methoxyphenyl)-3-(naphthalen-1-yl)propyl acetate (22)**

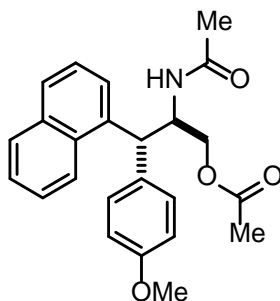

The **General Procedure A** was followed performing the reaction with *N*-(1-naphthylsulfonyl)acetamide (74.8 mg, 0.300 mmol) and [(*E*)-3-(4-methoxyphenyl)allyl] acetate (74.2 mg, 0.36 mmol) and purification by flash column chromatography (SiO<sub>2</sub>, 90:10→50:50 Hex:EtOAc) to furnish the title compound as a white foam (70 mg, 60%).

**<sup>1</sup>H NMR** (700 MHz, CDCl<sub>3</sub>): δ = 8.13 (d, *J* = 8.5 Hz, 1H), 7.83 (d, *J* = 8.0 Hz, 1H), 7.74 (d, *J* = 8.2 Hz, 1H), 7.67 (d, *J* = 7.2 Hz, 1H), 7.54 – 7.46 (m, 2H), 7.43 (t, *J* = 7.4 Hz, 1H), 7.25 (d, *J* = 9.8 Hz, 2H), 6.77 (d, *J* = 8.6 Hz, 2H), 5.40 (d, *J* = 9.1 Hz, 1H), 5.21 – 5.08 (m, 1H), 4.93 (d, *J* = 11.2 Hz, 1H), 4.18 (dd, *J* = 11.3, 2.9 Hz, 1H), 3.96 (dd, *J* = 11.3, 4.0 Hz, 1H), 3.71 (s, 3H), 2.15 (s, 3H), 1.76 (s, 3H). ppm

**<sup>13</sup>C NMR** (176 MHz, CDCl<sub>3</sub>): δ = 169.8, 158.5, 136.2, 134.2, 132.4, 131.8, 129.3, 129.1, 127.5, 126.1, 125.6, 125.4, 124.1, 123.0, 114.2, 65.1, 55.2, 50.8, 46.5, 23.2, 20.9.ppm

**R<sub>f</sub>** (5:5 – EtOAc:Hex) = 0.1

**IR** (*neat*): 2929, 2752, 1737, 1648, 1510, 1369, 1243, 1177, 1032, 783, 728 cm<sup>-1</sup>

**HRMS** (ESI+) *m/z* calculated for C<sub>24</sub>H<sub>25</sub>NO<sub>4</sub> [M+H]<sup>+</sup> 392.1856, found 392.1856.

<sup>1</sup>H NMR (700 MHz, CDCl<sub>3</sub>) for 22

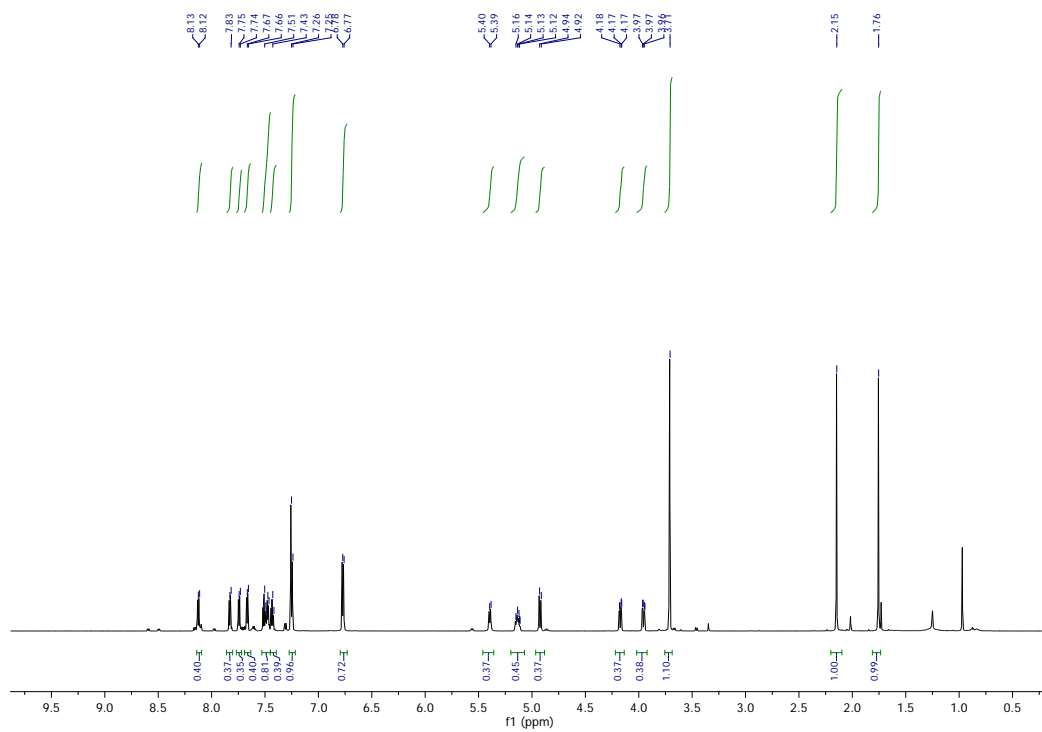

<sup>13</sup>C NMR (176 MHz, CDCl<sub>3</sub>) for 22

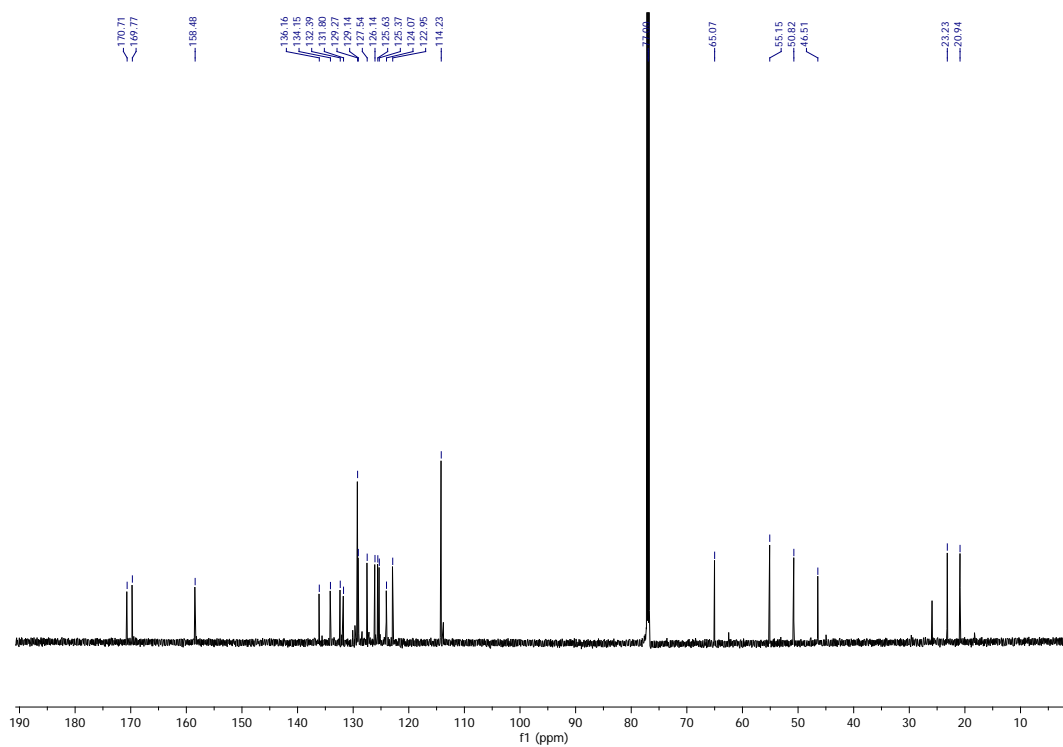

**N-(2-(4-methoxyphenyl)-2-(naphthalen-1-yl)cyclopentyl)acetamide (23)**

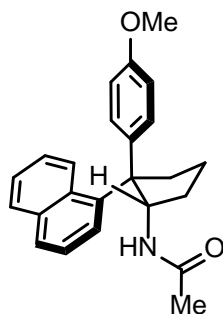

The **General Procedure A** was followed performing the reaction with *N*-(1-naphthylsulfonyl)acetamide (75 mg, 0.3 mmol) and 1-(cyclopenten-1-yl)-4-methoxybenzene (63 mg, 0.36 mmol) and purification by flash column chromatography (SiO<sub>2</sub>, 90:10→30:70 Hex:EtOAc) to furnish the title compound as a light yellow foam (40 mg, 37%).

**<sup>1</sup>H NMR** (700 MHz, CDCl<sub>3</sub>): δ = 7.80 (d, *J* = 8.2 Hz, 1H), 7.77 (t, *J* = 7.3 Hz, 2H), 7.66 (d, *J* = 8.7 Hz, 1H), 7.51 (t, *J* = 7.7 Hz, 1H), 7.31 (t, *J* = 7.4 Hz, 1H), 7.19 (d, *J* = 8.8 Hz, 2H), 7.16 (t, *J* = 7.7 Hz, 1H), 6.75 (d, *J* = 8.8 Hz, 2H), 5.47 (dd, *J* = 13.3, 7.3 Hz, 1H), 4.88 (d, *J* = 7.4 Hz, 1H), 3.73 (s, 3H), 2.67 – 2.59 (m, 1H), 2.59 – 2.50 (m, 1H), 2.17 (s, 1H), 1.84 (dd, *J* = 19.9, 10.0 Hz, 1H), 1.78 – 1.66 (m, 1H), 1.60 (dd, *J* = 20.6, 9.5 Hz, 1H), 1.40 (s, 3H) ppm

**<sup>13</sup>C NMR** (176 MHz, CDCl<sub>3</sub>): δ = 168.8, 157.6, 139.9, 139.1, 134.7, 131.9, 128.7, 128.6, 127.4, 126.8, 126.0, 125.4, 125.3, 124.7, 113.7, 58.9, 55.1, 54.9, 41.6, 34.0, 23.1, 20.7 ppm

R<sub>f</sub> (5:5 – EtOAc:Hex) = 0.1

**IR** (*neat*): 2954, 1642, 1609, 1508, 1372, 1249, 1183, 1034, 827, 776 cm<sup>-1</sup>

**HRMS** (ESI+) *m/z* calculated for C<sub>24</sub>H<sub>25</sub>NO<sub>2</sub> [M+H]<sup>+</sup> 360.1958, found 360.1962.

<sup>1</sup>H NMR (700 MHz, CDCl<sub>3</sub>) for 23

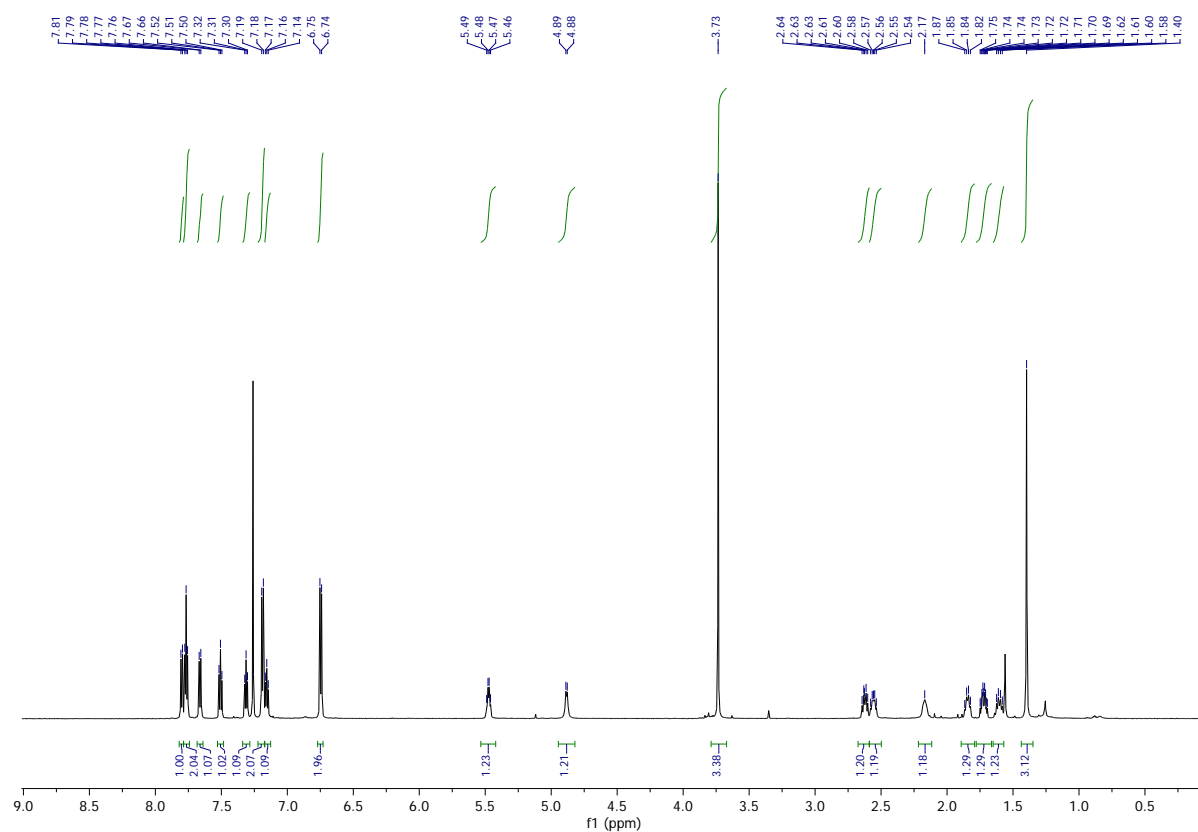

<sup>13</sup>C NMR (176 MHz, CDCl<sub>3</sub>) for 23

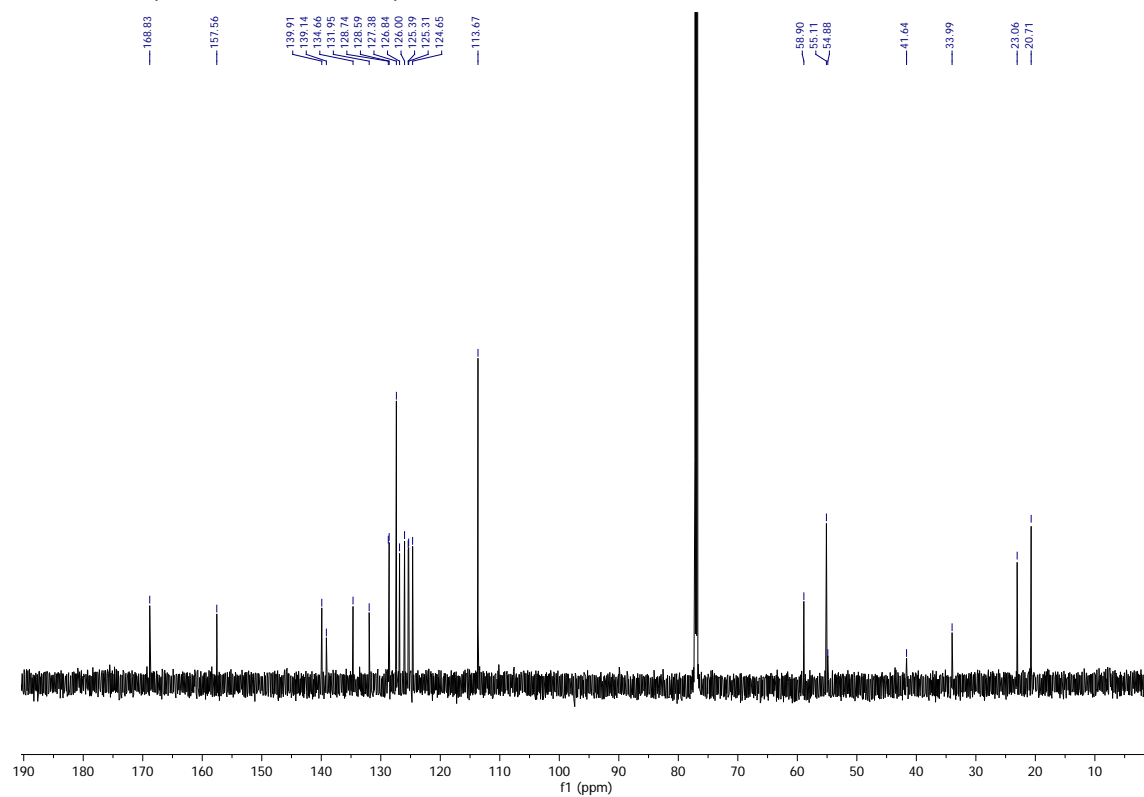

**N-(2-(4-methoxyphenyl)-2-(thiophen-2-yl)cyclopentyl)acetamide (24)**

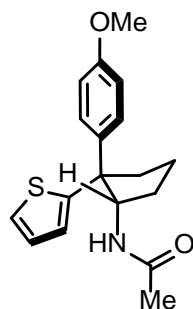

The **General Procedure A** was followed performing the reaction with *N*-(2-thienylsulfonyl)acetamide (62 mg, 0.3 mmol) and 1-(cyclopenten-1-yl)-4-methoxybenzene (63 mg, 0.36 mmol) and purification by flash column chromatography (SiO<sub>2</sub>, 90:10→30:70 Hex:EtOAc) to furnish the title compound as a light yellow foamy oil (55 mg, 58%).

**<sup>1</sup>H NMR** (700 MHz, CDCl<sub>3</sub>): δ 7.25 – 7.17 (m, 3H), 6.98 (dd, *J* = 4.8, 3.7 Hz, 1H), 6.81 (d, *J* = 8.7 Hz, 2H), 6.75 (d, *J* = 3.0 Hz, 1H), 5.36 (d, *J* = 9.4 Hz, 1H), 5.01 (dd, *J* = 17.3, 9.9 Hz, 1H), 3.78 (s, 3H), 2.63 (ddd, *J* = 13.9, 9.5, 4.4 Hz, 1H), 2.25 – 2.13 (m, 2H), 2.03 – 1.94 (m, 1H), 1.92 (s, 3H), 1.81 (ddd, *J* = 17.8, 11.3, 4.5 Hz, 1H), 1.60 – 1.51 (m, 1H) ppm

**<sup>13</sup>C NMR** (176 MHz, CDCl<sub>3</sub>): δ = 169.3, 158.0, 149.8, 139.4, 128.0, 126.7, 126.1, 124.7, 113.5, 55.1, 54.7, 54.6, 41.3, 30.4, 23.7, 19.5 ppm

**R<sub>f</sub>** (5:5 – EtOAc:Hex) = 0.1

**IR** (*neat*): 3292, 2927, 1651, 1607, 1510, 1372, 1248, 1181, 1032, 827 cm<sup>-1</sup>

**HRMS** (ESI+) *m/z* calculated for C<sub>18</sub>H<sub>21</sub>NO<sub>2</sub>S [M+H]<sup>+</sup> 316.1366, found 316.1364.

<sup>1</sup>H NMR (700 MHz, CDCl<sub>3</sub>) for 24

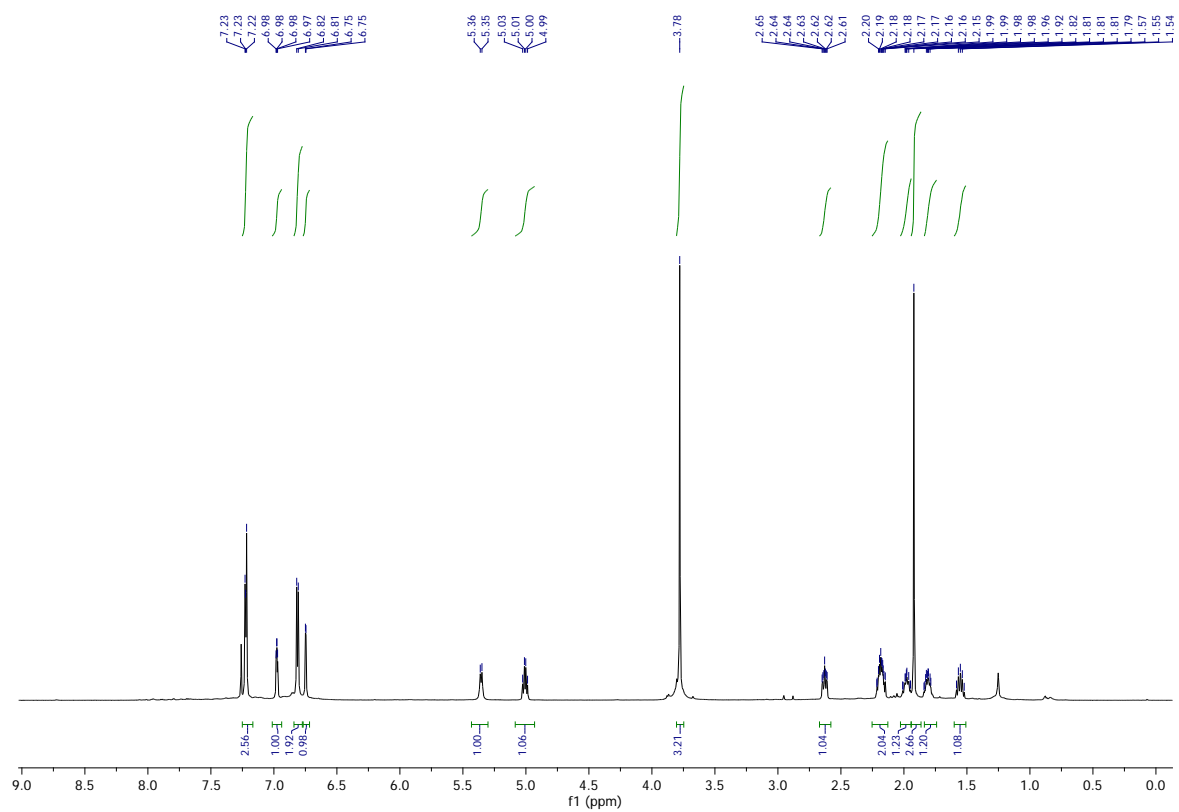

<sup>13</sup>C NMR (176 MHz, CDCl<sub>3</sub>) for 24

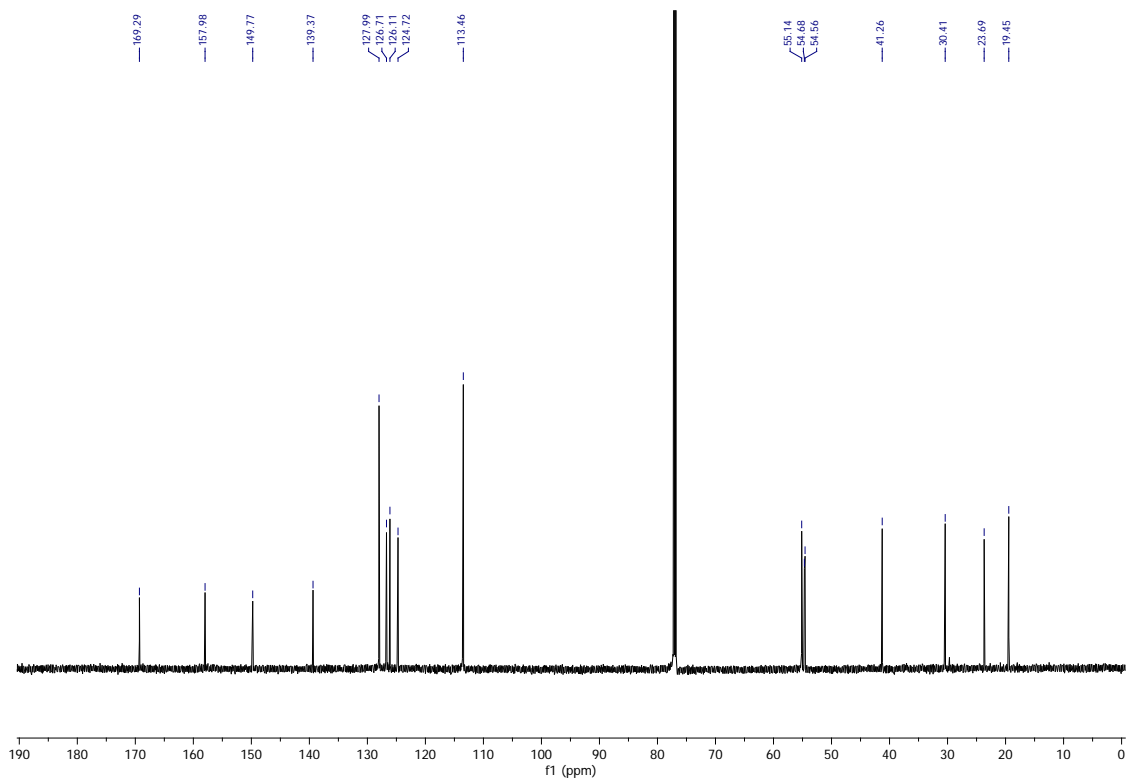

**Methyl-2-acetamido-1-(4-methoxyphenyl)cyclopentyl)thiophene-2-carboxylate (25)**

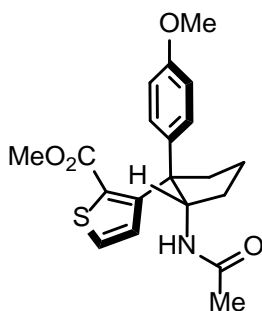

The **General Procedure A** was followed performing the reaction with methyl 3-(acetamido)thiophene-2-carboxylate (79 mg, 0.3 mmol) and 1-(cyclopent-1-yl)-4-methoxybenzene (63 mg, 0.36 mmol) and purification by flash column chromatography (SiO<sub>2</sub>, 90:10→30:70 Hex:EtOAc) to furnish the title compound as an off white foam (62 mg, 55%).

**<sup>1</sup>H NMR** (700 MHz, CDCl<sub>3</sub>): δ = 7.43 (d, *J* = 5.2 Hz, 1H), 7.21 (d, *J* = 5.2 Hz, 1H), 7.16 (d, *J* = 8.7 Hz, 2H), 6.77 (d, *J* = 8.7 Hz, 2H), 6.39 (d, *J* = 6.3 Hz, 1H), 5.03 (q, *J* = 6.6 Hz, 1H), 3.76 (s, 3H), 3.59 (s, 3H), 2.44 – 2.40 (bm, 1H), 2.39 – 2.33 (bm, 2H), 1.89 – 1.80 (bm, 4H), 1.77 – 1.67 (bm, 1H), 1.67 – 1.55 (bm, 2H) ppm

**<sup>13</sup>C NMR** (176 MHz, CDCl<sub>3</sub>): δ = 169.8, 163.3, 157.6, 150.4, 137.5, 131.2, 129.0, 128.4, 127.8, 113.2, 56.5, 56.3, 55.2, 52.4, 39.9, 31.0, 23.4, 20.6 ppm

**R<sub>f</sub>** (5:5 – EtOAc:Hex) = 0.2

**IR** (*neat*): 3290, 2949, 1719, 1649, 1510, 1434, 1371, 1246, 1182, 1031, 780 cm<sup>-1</sup>

**HRMS** (ESI+) *m/z* calculated for C<sub>20</sub>H<sub>23</sub>NO<sub>4</sub>S [M+H]<sup>+</sup> 374.1421, found 374.1428.



<sup>1</sup>H NMR (700 MHz, CDCl<sub>3</sub>) for 25

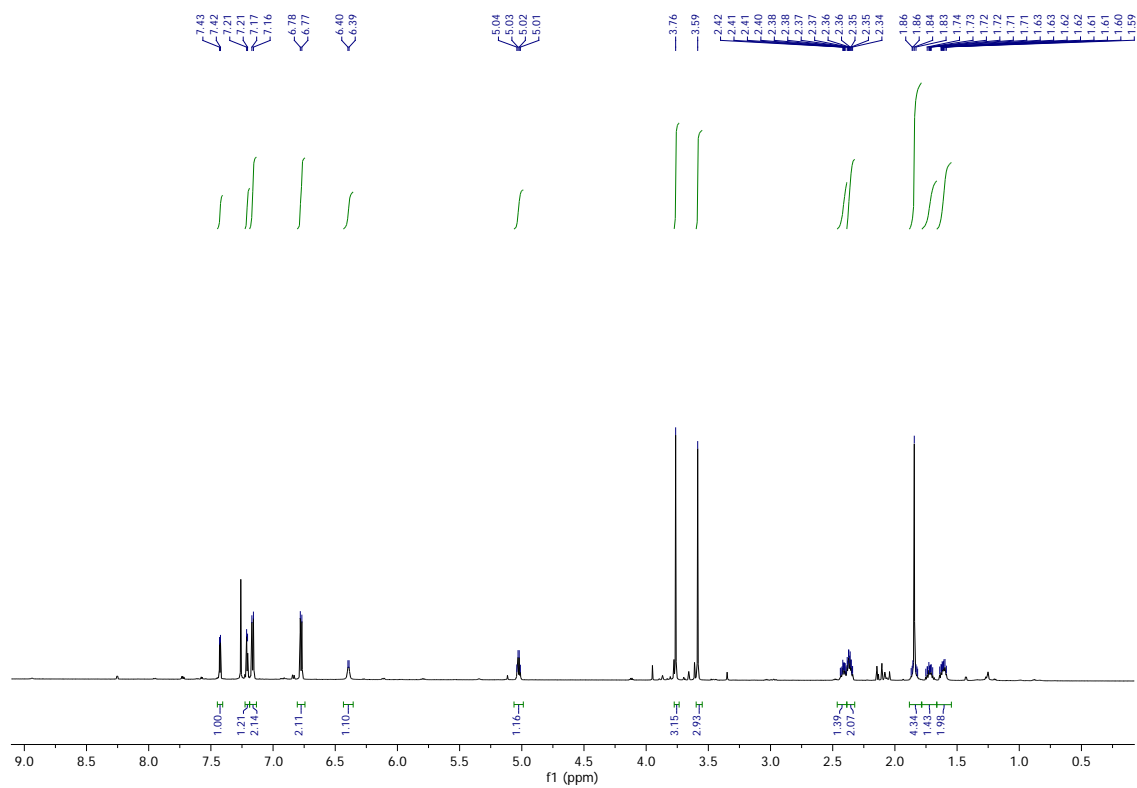

<sup>13</sup>C NMR (176 MHz, CDCl<sub>3</sub>) for 25

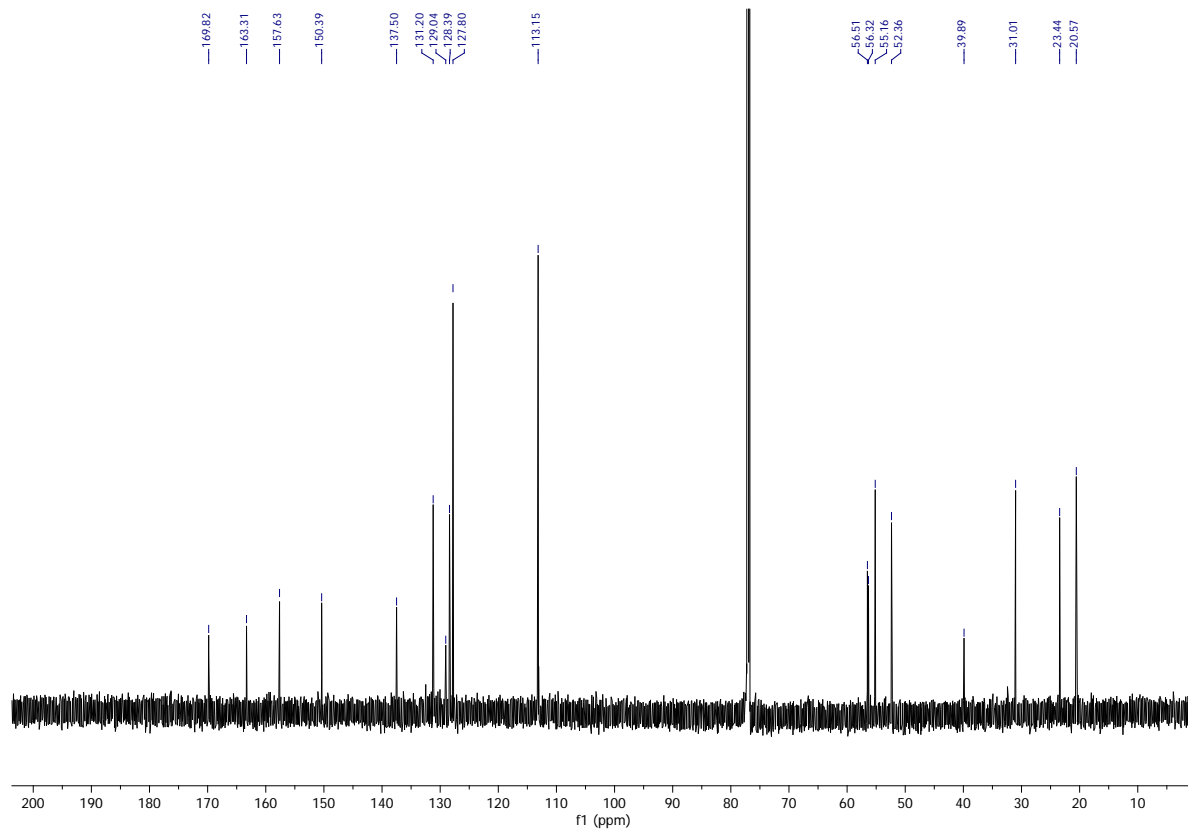

**N-(4-methoxyphenyl)-2-(naphthalen-1-yl)cycloheptyl)acetamide (26)**

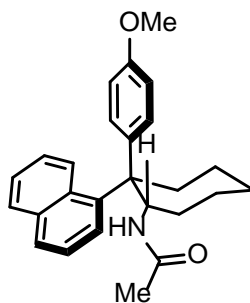

The **General Procedure A** was followed performing the reaction with *N*-(1-naphthylsulfonyl)acetamide (75 mg, 0.3 mmol) and 1-(4-methoxyphenyl)cycloheptene (73 mg, 0.36 mmol) and purification by flash column chromatography (SiO<sub>2</sub>, 90:10→30:70 Hex:EtOAc) to furnish the title compound as a light yellow foam (36 mg, 31%).

**<sup>1</sup>H NMR** (700 MHz, CDCl<sub>3</sub>): δ = 7.80 – 7.72 (m, 2H), 7.50 (d, *J* = 8.8 Hz, 1H), 7.48 (t, *J* = 7.8 Hz, 1H), 7.31 (t, *J* = 7.4 Hz, 1H), 7.20 – 7.04 (m, 3H), 6.73 (d, *J* = 8.4 Hz, 2H), 5.22 (bs, 1H), 5.15 (bs, 1H), 3.74 (s, 3H), 2.61 (dd, *J* = 15.0, 9.2 Hz, 1H), 2.51 – 2.40 (m, 1H), 2.36 (d, *J* = 22.7 Hz, 1H), 2.21 – 2.12 (m, 1H), 1.90 (s, 1H), 1.75 (dd, *J* = 14.2, 6.6 Hz, 1H), 1.71 – 1.61 (m, 1H), 1.56 (bs, 2H), 1.49 (dd, *J* = 12.7, 8.6 Hz, 1H), 1.35 (s, 3H) ppm

**<sup>13</sup>C NMR** (176 MHz, CDCl<sub>3</sub>): δ = 168.5, 157.4, 142.1, 140.9, 135.0, 132.3, 128.8, 128.5, 127.4, 125.6, 125.2, 125.1, 124.2, 113.6, 56.9, 55.1, 55.0, 42.1, 32.0, 29.7, 24.8, 24.6, 22.8 ppm

**R<sub>f</sub>** (5:5 – EtOAc:Hex) = 0.1

**IR** (*neat*): 2928, 2859, 1650, 1608, 1508, 1462, 1247, 1183, 726 cm<sup>-1</sup>

**HRMS** (ESI+) *m/z* calculated for C<sub>26</sub>H<sub>29</sub>NO<sub>2</sub> [M+H]<sup>+</sup> 388.2271, found 388.2268.

<sup>1</sup>H NMR (700 MHz, CDCl<sub>3</sub>) for 26

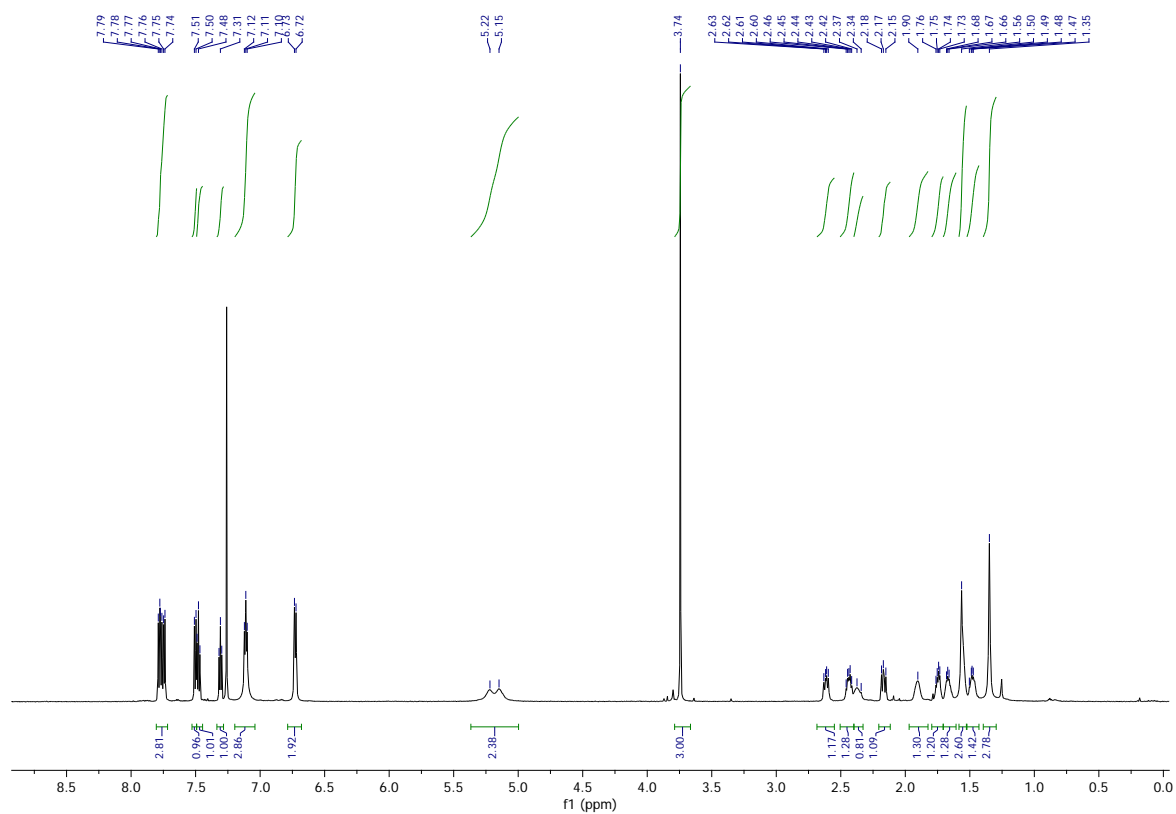

<sup>13</sup>C NMR (176 MHz, CDCl<sub>3</sub>) for 26

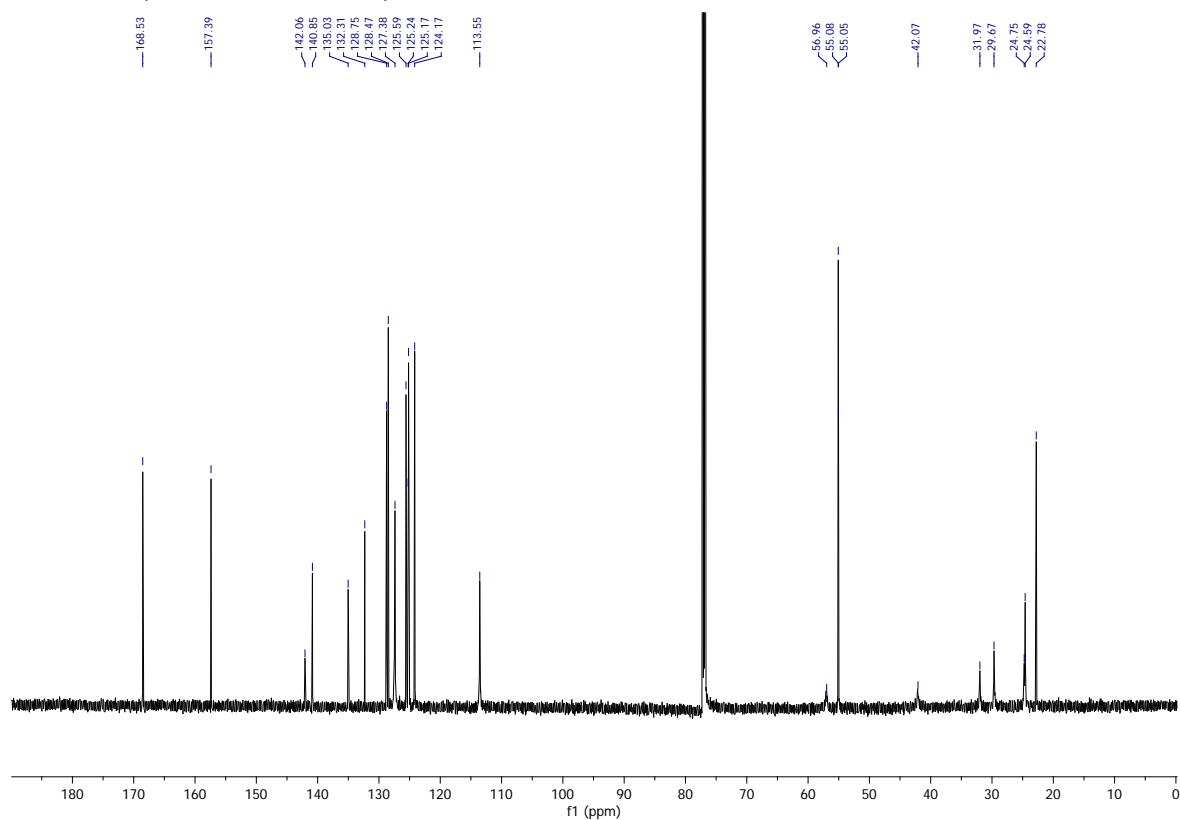

**N-6-methoxy-1,2,3,4-tetrahydro-[1,1'-binaphthalen]-2-yl)acetamide (27)**

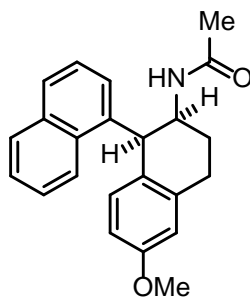

The **General Procedure A** was followed performing the reaction with *N*-(1-naphthylsulfonyl)acetamide (75 mg, 0.3 mmol) and 7-methoxy-1,2-dihydronaphthalene (57.7 mg, 0.36 mmol) and purification by flash column chromatography (SiO<sub>2</sub>, 90:10→30:70 Hex:EtOAc) to furnish the title compound as a light yellow foam (29 mg, 28%).

**<sup>1</sup>H NMR** (700 MHz, CDCl<sub>3</sub>): δ = 8.33 (d, *J* = 7.9 Hz, 1H), 7.87 (d, *J* = 8.1 Hz, 1H), 7.73 (d, *J* = 8.1 Hz, 1H), 7.57 (t, *J* = 7.5 Hz, 1H), 7.51 (t, *J* = 7.4 Hz, 1H), 7.34 (t, *J* = 7.7 Hz, 1H), 6.84 (d, *J* = 6.9 Hz, 1H), 6.78 (d, *J* = 8.5 Hz, 1H), 6.73 (d, *J* = 1.8 Hz, 1H), 6.63 (dd, *J* = 8.5, 2.2 Hz, 1H), 5.38 (d, *J* = 2.5 Hz, 1H), 4.77 (bs, 2H), 3.80 (s, 3H), 3.17 – 2.98 (m, 2H), 1.99 (ddd, *J* = 24.0, 12.0, 5.9 Hz, 1H), 1.74 (dd, *J* = 12.3, 5.9 Hz, 1H), 1.54 (s, 3H) ppm

**<sup>13</sup>C NMR** (176 MHz, CDCl<sub>3</sub>): δ = 169.5 (s), 158.1 (s), 138.6 (s), 137.1 (s), 133.5 (s), 133.3 (s), 131.9 (s), 130.6 (s), 129.7 (s), 128.7 (s), 127.2 (s), 126.1 (s), 125.6 (s), 125.1 (s), 123.7 (s), 113.1 (s), 112.6 (s), 55.2 (s), 48.4 (s), 29.7 (s), 28.8 (s), 24.0 (s), 23.4 (s) ppm

**R<sub>f</sub>** (5:5 – EtOAc:Hex) = 0.1

**IR** (*neat*): 2923, 2851, 1651, 1609, 1499, 1268, 1229, 1038, 907, 726, 647 cm<sup>-1</sup>

**HRMS** (ESI+) *m/z* calculated for C<sub>23</sub>H<sub>23</sub>NO<sub>2</sub> [M+H]<sup>+</sup> 346.1802, found 346.1803.

<sup>1</sup>H NMR (700 MHz, CDCl<sub>3</sub>) for 27

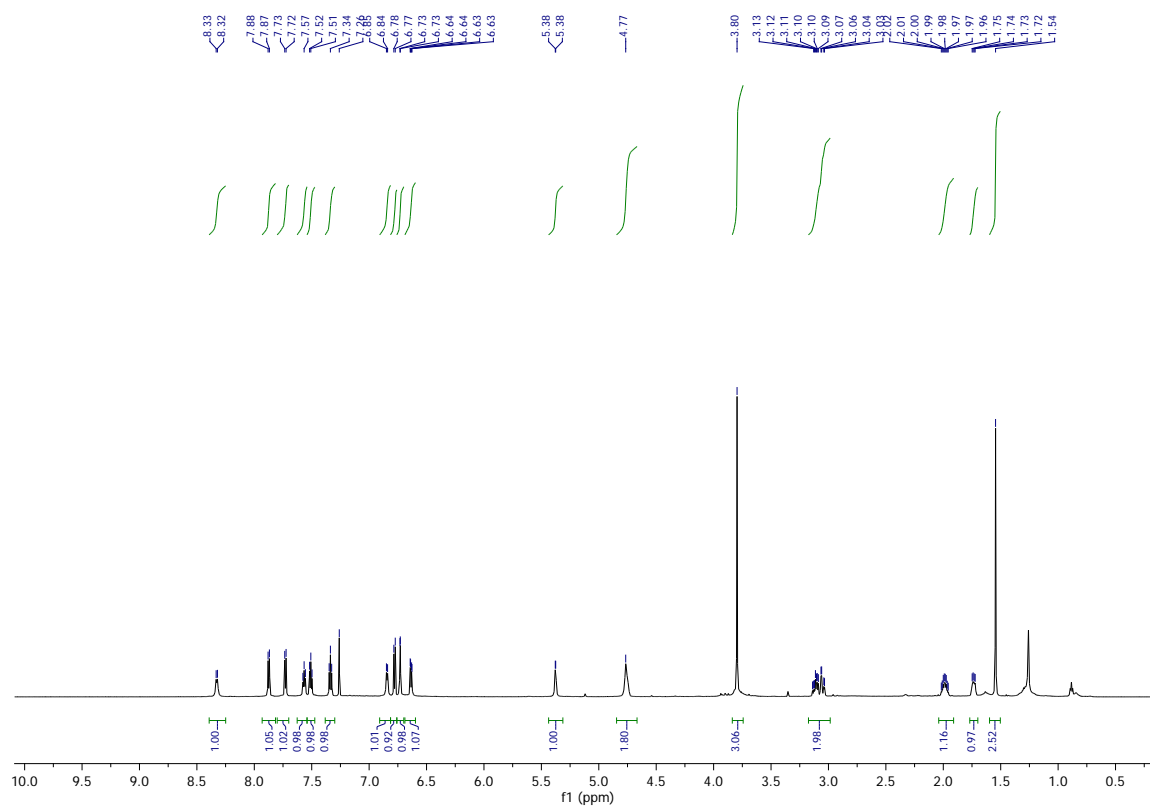

<sup>13</sup>C NMR (176 MHz, CDCl<sub>3</sub>) for 27

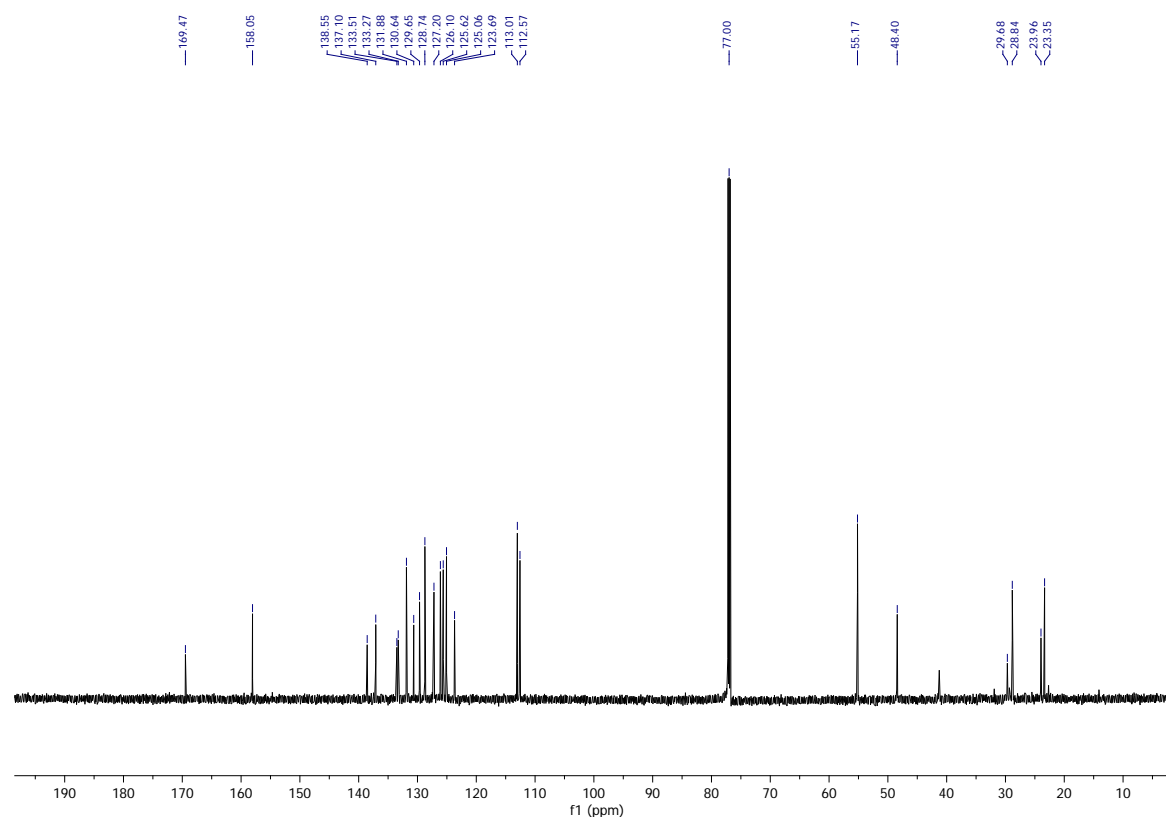

## X-Ray Crystallography Data

Crystallographic data for:

### *N*-1-(5-bromothiophen-2-yl)-1-(4-methoxyphenyl)propan-2-yl)acetamide (**15**)

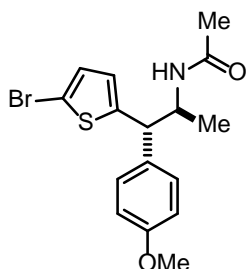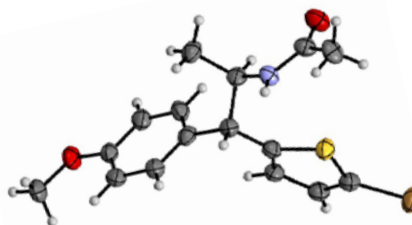

Structural figure of compound **15**, with 50% probability ellipsoids.

#### Accession Number

The structure of **15** has been deposited in the Cambridge Crystallographic Data Center under accession number CCDC: 1572215.

#### Structure Determination

Colorless plates of **15** were grown from by diethyl ether/pentane vapor diffusion at 22 °C. A crystal of dimensions 0.04 x 0.02 x 0.01 mm was mounted on a Rigaku AFC10K Saturn 944+ CCD-based X-ray diffractometer equipped with a low temperature device and Micromax-007HF Cu-target micro-focus rotating anode ( $\lambda = 1.54187 \text{ \AA}$ ) operated at 1.2 kW power (40 kV, 30 mA). The X-ray intensities were measured at 85(1) K with the detector placed at a distance 42.00 mm from the crystal. A total of 2028 images were collected with an oscillation width of 1.0° in  $\omega$ . The exposure times were 15 sec. for the low angle images, 80 sec. for high angle. Rigaku d\*trek images were exported to CrysAlisPro for processing and corrected for absorption. The integration of the data yielded a total of 24869 reflections to a maximum  $2\theta$  value of 138.84° of which 3075 were independent and 2171 were greater than  $2\sigma(I)$ . The final cell constants (Table S4) were based on the xyz centroids of 3709 reflections above  $10\sigma(I)$ . Analysis of the data showed negligible decay during data collection. The structure was solved and refined with the Bruker SHELXTL (version 2016/6) software package (52), using the space group P2(1)/c with  $Z = 4$  for the formula  $C_{16}H_{18}NO_2SBr$ . All non-hydrogen atoms were refined anisotropically with the hydrogen atoms placed in a combination of refined and idealized positions. Full matrix least-squares refinement based on  $F^2$  converged at  $R1 = 0.0599$  and  $wR2 = 0.1512$  [based on  $I > 2\sigma(I)$ ],  $R1 = 0.0894$  and  $wR2 = 0.1732$  for all data (53, 54). Additional details are presented in Table S4. Acknowledgement is made for funding from NSF grant CHE-0840456 for X-ray instrumentation.

**Table S4.** Crystal data and structure refinement.

|                                         |                                                                                                                          |
|-----------------------------------------|--------------------------------------------------------------------------------------------------------------------------|
| <b>Empirical formula</b>                | C16 H18 Br N O2 S                                                                                                        |
| <b>Formula weight</b>                   | 368.28                                                                                                                   |
| <b>Temperature</b>                      | 85(2) K                                                                                                                  |
| <b>Wavelength</b>                       | 1.54184 Å                                                                                                                |
| <b>Crystal system, space group</b>      | Monoclinic, P2(1)/c                                                                                                      |
| <b>Unit cell dimensions</b>             | a = 16.2401(10) Å    alpha = 90 deg.<br>b = 10.9158(5) Å    beta = 101.798(7) deg.<br>c = 9.5079(6) Å    gamma = 90 deg. |
| <b>Volume</b>                           | 1649.89(17) Å <sup>3</sup>                                                                                               |
| <b>Z, Calculated density</b>            | 4, 1.483 Mg/m <sup>3</sup>                                                                                               |
| <b>Absorption coefficient</b>           | 4.607 mm <sup>-1</sup>                                                                                                   |
| <b>F(000)</b>                           | 752                                                                                                                      |
| <b>Crystal size</b>                     | 0.040 x 0.020 x 0.010 mm                                                                                                 |
| <b>Theta range for data collection</b>  | 2.780 to 69.421 deg.                                                                                                     |
| <b>Limiting indices</b>                 | -19<=h<=19, -13<=k<=13, -11<=l<=11                                                                                       |
| <b>Reflections collected / unique</b>   | 24869 / 3075 [R(int) = 0.1138]                                                                                           |
| <b>Completeness to theta</b>            | = 67.684    99.9 %                                                                                                       |
| <b>Absorption correction</b>            | Semi-empirical from equivalents                                                                                          |
| <b>Max. and min. transmission</b>       | 1.00000 and 0.81698                                                                                                      |
| <b>Refinement method</b>                | Full-matrix least-squares on F <sup>2</sup>                                                                              |
| <b>Data / restraints / parameters</b>   | 3075 / 0 / 197                                                                                                           |
| <b>Goodness-of-fit on F<sup>2</sup></b> | 1.042                                                                                                                    |
| <b>Final R indices [I&gt;2sigma(I)]</b> | R1 = 0.0599, wR2 = 0.1512                                                                                                |
| <b>R indices (all data)</b>             | R1 = 0.0894, wR2 = 0.1732                                                                                                |
| <b>Extinction coefficient</b>           | n/a                                                                                                                      |
| <b>Largest diff. peak and hole</b>      | 1.452 and -0.856 e.Å <sup>-3</sup>                                                                                       |

### **N-(2-(4-methoxyphenyl)-2-(naphthalen-1-yl)cyclopentyl)acetamide (23)**

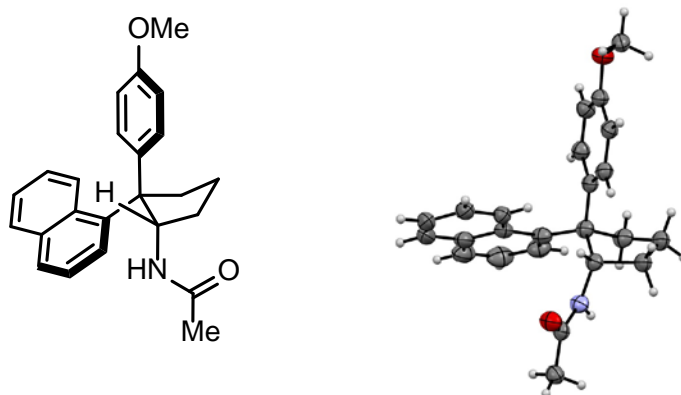

Structural figure of compound **23**, with 50% probability ellipsoids

#### Accession Number

The structure of **23** has been deposited in the Cambridge Crystallographic Data Center under accession number CCDC: 1572214.

#### Structure Determination

Colorless blocks of **23** were grown by vapor diffusion of diethyl ether into a pentane solution of the compound at 22 ° C. A crystal of dimensions 0.10 x 0.10 x 0.09 mm was mounted on a Rigaku AFC10K Saturn 944+ CCD-based X-ray diffractometer equipped with a low temperature device and Micromax-007HF Cu-target micro-focus rotating anode ( $\lambda = 1.54187$  Å) operated at 1.2 kW power (40 kV, 30 mA). The X-ray intensities were measured at 85(1) K with the detector placed at a distance 42.00 mm from the crystal. A total of 2028 images were collected with an oscillation width of 1.0° in  $\omega$ . The exposure times were 1 sec. for the low angle images, 4 sec. for high angle. Rigaku d\*trek images were exported to CrysAlisPro for processing and corrected for absorption. The integration of the data yielded a total of 28115 reflections to a maximum  $2\theta$  value of 138.62° of which 6933 were independent and 5766 were greater than  $2\sigma(I)$ . The final cell constants (Table S5) were based on the xyz centroids of 8542 reflections above  $10\sigma(I)$ . Analysis of the data showed negligible decay during data collection. The structure was solved and refined with the Bruker SHELXTL (version 2016/6) software package (52), using the space group P1bar with  $Z = 4$  for the formula  $C_{24}H_{25}NO_2$ . All non-hydrogen atoms were refined anisotropically with the hydrogen atoms placed in a combination of refined and idealized positions. Full matrix least-squares refinement based on  $F^2$  converged at  $R1 = 0.0537$  and  $wR2 = 0.1504$  [based on  $I > 2\sigma(I)$ ],  $R1 = 0.0634$  and  $wR2 = 0.1646$  for all data (53, 54). Additional details are presented in Table S5. Acknowledgement is made for funding from NSF grant CHE-0840456 for X-ray instrumentation.



**Table S5.** Crystal data and structure refinement for **23**.

|                                         |                                                                                                                                      |
|-----------------------------------------|--------------------------------------------------------------------------------------------------------------------------------------|
| <b>Empirical formula</b>                | C <sub>24</sub> H <sub>25</sub> N O <sub>2</sub>                                                                                     |
| <b>Formula weight</b>                   | 359.45                                                                                                                               |
| <b>Temperature</b>                      | 85(2) K                                                                                                                              |
| <b>Wavelength</b>                       | 1.54184 Å                                                                                                                            |
| <b>Crystal system, space group</b>      | Triclinic, P-1                                                                                                                       |
| <b>Unit cell dimensions</b>             | a = 9.3165(6) Å    alpha = 88.002(3) deg.<br>b = 12.6453(6) Å    beta = 76.578(4) deg.<br>c = 16.9508(5) Å    gamma = 83.003(5) deg. |
| <b>Volume</b>                           | 1927.92(17) Å <sup>3</sup>                                                                                                           |
| <b>Z, Calculated density</b>            | 4, 1.238 Mg/m <sup>3</sup>                                                                                                           |
| <b>Absorption coefficient</b>           | 0.613 mm <sup>-1</sup>                                                                                                               |
| <b>F(000)</b>                           | 768                                                                                                                                  |
| <b>Crystal size</b>                     | 0.100 x 0.100 x 0.090 mm                                                                                                             |
| <b>Theta range for data collection</b>  | 2.680 to 69.309 deg.                                                                                                                 |
| <b>Limiting indices</b>                 | -11 ≤ h ≤ 11, -15 ≤ k ≤ 15, -20 ≤ l ≤ 20                                                                                             |
| <b>Reflections collected / unique</b>   | 28115 / 6933 [R(int) = 0.0461]                                                                                                       |
| <b>Completeness to theta</b>            | = 67.684    97.5 %                                                                                                                   |
| <b>Absorption correction</b>            | Semi-empirical from equivalents                                                                                                      |
| <b>Max. and min. transmission</b>       | 1.00000 and 0.76174                                                                                                                  |
| <b>Refinement method</b>                | Full-matrix least-squares on F <sup>2</sup>                                                                                          |
| <b>Data / restraints / parameters</b>   | 6933 / 0 / 500                                                                                                                       |
| <b>Goodness-of-fit on F<sup>2</sup></b> | 1.046                                                                                                                                |
| <b>Final R indices [I &gt; 2σ(I)]</b>   | R1 = 0.0537, wR2 = 0.1504                                                                                                            |
| <b>R indices (all data)</b>             | R1 = 0.0634, wR2 = 0.1646                                                                                                            |
| <b>Extinction coefficient</b>           | 0.0040(5)                                                                                                                            |
| <b>Largest diff. peak and hole</b>      | 0.273 and -0.248 e.Å <sup>-3</sup>                                                                                                   |

## References

1. J. W. Dalley, B. J. Everitt, Dopamine receptors in the learning, memory and drug reward circuitry. *Semin. Cell Dev. Biol.* **20**, 403-410 (1980).
2. A. Zhang, J. L. Neumeier, R. J. Baldessarini, Recent progress in development of dopamine receptor subtype-selective agents: potential therapeutics for neurological and psychiatric disorders. *Chem. Rev.* **107**, 274-302 (2007).
3. National Institute on Drug Abuse. Effective Treatments for Opioid Addiction. <https://www.drugabuse.gov/publications/effective-treatments-opioid-addiction/effective-treatments-opioid-addiction>. (accessed May 17, 2018)
4. V. Spahn, G. Del Vecchio, D. Labuz, A. Rodriguez-Gaztelumendi, N. Massaly, J. Temp, V. Durmaz, P. Sabri, M. Reidelbach, H. Machelska, M. Weber, C.A. Stein, A nontoxic pain killer designed by modeling of pathological receptor conformations. *Science* **355**, 966-969 (2017).
5. H. Ding, P. W. Czoty, N. Kiguchi, G. Cami-Kobeci, D. D. Sukhtankar, M. A. Nader, S. M. Husbands, M-C. Ko, A novel orvinol analog, BU08028, as a safe opioid analgesic without abuse liability in primates. *PNAS* **113**, E5511-E5518 (2016).
6. D. M. Schultz, J. P. Wolfe, Recent developments in palladium-catalyzed alkene aminoarylation reactions for the synthesis of nitrogen heterocycles. *Synthesis* **44**, 351-361 (2012).
7. Z. Liu, Y. Wang, Z. Wang, T. Zeng, P. Liu, K. M. Engle, Catalytic intermolecular carboamination of unactivated alkenes via directed aminopalladation. *J. Am. Chem. Soc.* **139**, 11261-11270 (2017).

8. S. R. Chemler, The enantioselective intramolecular aminative functionalization of unactivated alkenes, dienes, allenes and alkynes for the synthesis of chiral nitrogen heterocycles. *Org. Biomol. Chem.* **7**, 3009-3019 (2009).
9. D. Wang, L. Wu, F. Wang, X. Wan, P. Chen, Z. Lin, G. Liu, Asymmetric copper-catalyzed intermolecular aminoarylation of styrenes: efficient access to optical 2,2-diarylethylamines. *J. Am. Chem. Soc.* **139**, 6811-6814 (2017).
10. C.E. Sleet, U.K. Tambar, Copper-catalyzed aminothiolation of 1,3-dienes *via* a dihydrothiazine intermediate. *Angew. Chem. Int. Ed.* **56**, 5536-5540 (2017).
11. H-B. Yang, S. R. Pathipati, N. Selander, Nickel-catalyzed 1,2-aminoarylation of oxime ester-tethered alkenes with boronic acids. *ACS Catal.* **12**, 8441-8445 (2017).
12. S. Z. Tasker, T. F. Jamison, Highly regioselective indoline synthesis under nickel/photoredox dual catalysis. *J. Am. Chem. Soc.* **137**, 9531-9534 (2015).
13. E. Tkatchouk, N. P. Mankad, D. Benitez, W. A. Goddard III, F. D. Toste, Two metals are better than one in the gold catalyzed oxidative heteroarylation of alkenes. *J. Am. Chem. Soc.* **133**, 14293-14300 (2011).
14. T. E. Müller, M. Beller, Metal-Initiated Amination of Alkenes and Alkynes. *Chem. Rev.* **98**, 675-703 (1998).
15. T. Piou, T. Rovis, Rhodium-catalysed *syn*-carboamination of alkenes via a transient directing group. *Nature* **527**, 86-90 (2015).
16. S. Kindt, M.R. Heinrich, Recent advances in Meerwein arylation chemistry. *Synthesis* **48**, 1597-1606 (2016).

17. A.J. Musacchio, B.C. Lainhart, X. Zhang, S.G. Naguib, T.C. Sherwood, R.R. Knowles, Catalytic intermolecular hydroaminations of unactivated olefins with secondary alkyl amines. *Science* **355**, 727-730 (2017).
18. A.J. Musacchio, Q.L. Nguyen, G.H. Beard, R.R. Knowles, Catalytic olefin hydroamination with aminium radical cations: a photoredox method for direct C–N bond formation. *J. Am. Chem. Soc.* **136**, 12217-12220 (2014).
19. Q. Zhu, D.E. Graff, R.R. Knowles, Intermolecular *anti*-Markovnikov hydroamination of unactivated alkenes with sulfonamides enabled by proton-coupled electron transfer. *J. Am. Chem. Soc.* **140**, 741-747 (2018).
20. G.J. Choi, R.R. Knowles, Catalytic alkene carboaminations enabled by oxidative proton-coupled electron transfer. *J. Am. Chem. Soc.* **137**, 9226-9229 (2015).
21. D.C. Miller, G.J. Choi, S.H. Orbe, R.R. Knowles, Catalytic olefin hydroamidation enabled by proton-coupled electron transfer. *J. Am. Chem. Soc.* **137**, 13492-13495 (2015).
22. K.A. Margrey, D.A. Nicewicz, A general approach to catalytic alkene *anti*-Markovnikov hydrofunctionalization reactions *via* acridinium photoredox catalysis. *Acc. Chem. Res.* **49**, 1997-2006 (2016).
23. T. M. Nguyen, N. Manohar, D. A. Nicewicz, *Anti*-Markovnikov hydroamination of alkenes catalyzed by a two-component organic photoredox system: direct access to phenethylamine derivatives. *Angew. Chem. Int. Ed.* **53**, 6198-6120 (2014).

24. N. J. Gesmundo, J-M. M. Grandjean, D. A. Nicewicz, Amide and amine nucleophiles in polar radical crossover cycloadditions: synthesis of  $\gamma$ -lactams and pyrrolidines. *Org. Lett.* **17**, 1316-1319 (2015).
25. S. Z. Zard, Recent progress in the generation and use of nitrogen-centered radicals. *Chem Soc. Rev.* **37**, 1603-1618 (2008)].
26. K. Plesniak, A. Zarecki, J. Wicha, The Smiles rearrangement and the Julia-Kocienski olefination reaction, *Top. Curr. Chem.* **275**, 163-250 (2007).
27. W. B. Motherwell, A. M. K. Pennell, A novel route to biaryls *via* intramolecular free radical *ipso*-substitution reactions. *J. Chem. Soc. Chem. Commun.* **1991**, 877-879.
28. C. M. Holden, M. F. Greaney, Modern aspects of the Smiles rearrangement. *Chem Eur J.* **23**, 8992-9008 (2017).
29. A. R. P. Henderson, J. R. Kosowan, T. E. Wood, The Truce-Smiles rearrangement and related reactions: a review. *Can. J. Chem.* **95**, 483-504 (2017).
30. T. J. Snape, A truce on the Smiles rearrangement: revisiting an old reaction – the Truce-Smiles rearrangement. *Chem. Soc. Rev.* **37**, 2452-2458 (2008).
31. I. Allart-Simon, S. Gérard, J. Sapi, Radical Smiles rearrangement: An update. *Molecules* **21**, 878-889 (2016).
32. J. J. Douglas, H. Albright, M. J. Sevrin, K. P. Cole, C. R. J. Stephenson, A visible-light-mediated radical Smiles rearrangement and its application to the synthesis of a difluorosubstituted spirocyclic ORL-1 antagonist. *Angew. Chem. Int. Ed.* **54** 14898-14902 (2015).

33. J. J. Douglas, M. J. Sevrin, K. P. Cole, C. R. J. Stephenson, Preparative scale demonstration and mechanistic investigation of a visible light-mediated radical Smiles rearrangement. *Org. Process Res. Dev.* **20**, 1148-1155 (2016).
34. P. T. G. Rabet, S. Boyd, M. F. Greaney, Metal-free intermolecular aminoarylation of alkynes. *Angew. Chem. Int. Ed.* **56**, 4183-4186 (2017).
35. L. J. Johnston, N. P. Schepp, Reactivities of radical cations: characterization of styrene radical cations and measurements of their reactivity toward nucleophiles. *J. Am. Chem. Soc.* **115**, 6564-6571 (1993).
36. N. P. Schepp, L. J. Johnston, Reactivity of radical cations. Effect of radical cation and alkene structure on the absolute rate constants of radical cation mediated cycloaddition reactions. *J. Am. Chem. Soc.* **118**, 2872-2881 (1996).
37. H-C. Xu, K.D. Moeller, Intramolecular anodic olefin coupling reactions: the use of a nitrogen trapping group. *J. Am. Chem. Soc.* **130**, 13542-13543 (2008).
38. Z-M. Chen, X-M. Zhang, Y-Q. Tu, Radical aryl migration reactions and synthetic applications. *Chem. Soc. Rev.* **44**, 5520-5245 (2015).
39. H. G. Roth, N. A. Romero, D. A. Nicewicz, Experimental and calculated electrochemical potentials of common organic molecules for applications to single electron redox chemistry. *Synlett* **27**, 714-723. (2016).
40. G. J. Choi, Z. Zhu, D. C. Miller, C. J. Gu, R. R. Knowles, Catalytic alkylation of remote C-H bonds enabled by proton-coupled electron transfer. *Nature* **539**, 268-271 (2016).

41. C. K. Prier, D. A. Rankic, D. W. C. MacMillan, Visible light photoredox catalysis with transition metal complexes: applications in organic synthesis. *Chem. Rev.* **113**, 5322-5363 (2013).
42. S. Fukuzumi, K. Ohkubo, T. Suenobu, K. Kato, M. Fujitsuka, O. Ito, Photoalkylation of 10-alkylacridinium ion via a charge-shift type of photoinduced electron transfer controlled by solvent polarity. *J. Am. Chem. Soc.* **123**, 8459-8467 (2001).
43. F. D. Lewis, M. Kojima, Photodimerization of singlet *trans*- and *cis*-anethole. Concerted or stepwise? *J. Am. Chem. Soc.* **110**, 8660-8664 (1988).
44. M. S. Lowry, J. I. Goldsmith, J. D. Slinker, R. Rohl, R.A. Pascal, G.G. Malliaras, S. Bernhard, Single-layer electroluminescent devices and photoinduced hydrogen production from an ionic Iridium (III) complex. *Chem. Mater.* **17**, 5712-5719 (2005).
45. N. A. Romero, D. A. Nicewicz, Organic Photoredox Catalysis. *Chem Rev.* **116**, 10075-10166 (2016).
46. T. M. Monos, A. C. Sun, R. C. McAtee, J. J. Devery III, C. R. J. Stephenson, Microwave-assisted synthesis of heteroleptic Ir(III)<sup>+</sup> polypyridyl complexes. *J. Org. Chem.* **81**, 6988-6994 (2016).
47. T. R. Blum, Y. Zhu, S. A. Nordeen, T. P. Yoon, Photocatalytic synthesis of dihydrobenzofurans by oxidative [3+2] cycloaddition of phenols. *Angew. Chem. Int.* **53**, 11056-11059 (2014).
48. G. Vassilikogiannakis, M. Hatzimarinaki, M. Orfanopoulos, Mechanism of the [2+2] photocycloaddition of fullerene C<sub>60</sub> with styrenes. *J. Org. Chem.* **65**, 8180-8187 (2000).

49. J. Tallineau, G. Bashiardes, J-M. Coustard, F. Lecourneau, A one-pot preparation of aryl- and heteroarylcycloalkenes: application to the total synthesis of ( $\pm$ )-Laurokamurene B. *Synlett* **17**, 2761-2764 (2009).
50. K. T. Tarantino, P. Liu, R. R. Knowles, Catalytic ketyl-olefin cyclizations enabled by proton-coupled electron transfer. *J. Am. Chem. Soc.* **135** 10022-10025 (2013).
51. P. B. Hopkins, P. L. Fuchs, Chlorosulfonylation-dehydrochlorination reactions. New and improved methodology for the synthesis of unsaturated aryl sulfides and aryl sulfones. *J. Org. Chem.* **43**, 1208-1217 (1978).
52. G.M. Sheldrick. Crystal structure refinement with SHELXL. *Acta Cryst.* C71, 3-8 (2015).
53. CrystalClear Expert 2.0 r16, Rigaku Americas and Rigaku Corporation (2014), Rigaku Americas, 9009, TX, USA 77381-5209, Rigaku Tokyo, 196-8666, Japan.
54. CrysAlisPro 1.171.38.41 (Rigaku Oxford Diffraction, 2015).
